# Supplementary material
Source: HighWire-hosted journal article supplement (https://bmjopen.bmj.com/content/12/8/e061040)
Supplement: inline-supplementary-material-1 [file inline-supplementary-material-1.xls]

## Sheet: uniq10-15
Storage	porB	tbpB	ST	porB_class	DoC	Sex	Loc Cat	Spec category	DGI	age	age cat	Postcode	PubMLST ID	ENA Accession
NgBox01/09	301	29	359	PIB	2010-01-04	M	South	Oropharangeal	0	41	≥30	4216
NgBox01/10	1840	29	3042	PIA	2010-01-04	M	North	Genital	0	24	<30	4810
NgBox01/11	2354	4	6866	PIB	2010-01-09	F	South	Genital	0	19	<30	4214
NgBox01/12	908	110	1407	PIB	2010-01-05	M	South	Genital	0	33	≥30	4011
NgBox01/13	1914	110	3158	PIB	2010-01-07	M	South	Genital	0	26	<30	4501
NgBox01/14	4097	4	6877	PIB	2010-01-07	M	South	Anorectal	0	45	≥30	4151
NgBox01/15	2280	1329	6863	PIB	2010-01-05	F	North	Genital	0	20	<30	4870
NgBox01/16	4098	349	6878	PIB	2010-01-04	M	North	Genital	0	19	<30	4887
NgBox01/17	4099	349	6879	PIB	2010-01-08	M		Genital	0	17	<30	4700
NgBox01/18	262	1332	6880	PIB	2010-01-04	M	North	Genital	0	17	<30	4810
NgBox01/19	147	197	1214	PIA	2010-01-06	M	North	Genital	0	19	<30	4810
NgBox01/20	847	29	1313	PIB	2010-01-07	M	South	Genital	0	19	<30	4215
NgBox01/22	262	1332	6880	PIB	2010-01-05	M	North	Genital	0	24	<30	4817
NgBox01/23	262	1332	6880	PIB	2010-01-04	F	South	Genital	0	23	<30	4280
NgBox01/24	263	583	6881	PIB	2010-01-05	F	South	Genital	0	20	<30	4218
NgBox01/25	4	28	6882	PIB	2010-01-08	M	South	Oropharangeal	0	37	≥30	4066
NgBox01/26	4100	294	6883	PIB	2010-01-11	M	South	Genital	0	30	≥30	4128
NgBox01/27	4101	1330	6876	PIA	2010-01-08	M	North	Genital	0	24	<30	4875
NgBox01/28	227	26	190	PIB	2010-01-13	F	South	Genital	0	22	<30	4556
NgBox01/29	702	355	6884	PIB	2010-01-12	M	South	Genital	0	45	≥30	4121
NgBox01/30	227	26	190	PIB	2010-01-12	F	South	Genital	0	25	<30	4223
NgBox01/31	4103	33	6885	PIB	2010-01-12	F	South	Oropharangeal	0	23	<30	4012
NgBox01/32	2280	1329	6863	PIB	2010-01-11	M	North	Genital	0	21	<30	4870
NgBox01/33	227	26	190	PIB	2010-01-14	M	South	Genital	0	18	<30	4228
NgBox01/34	4104	1334	6886	PIA	2010-01-14	M	North	Genital	0	30	≥30	4869	52753	ERS11906291
NgBox01/35	147	197	1214	PIA	2010-01-13	F	North	Genital	0	19	<30	4810
NgBox01/36	4105	736	6887	PIA	2010-01-14	M	South	Genital	0	17	<30	4211
NgBox01/37	4	4	225	PIB	2010-01-15	M	South	Anorectal	0	30	≥30	4006
NgBox01/38	1891	4	3140	PIB	2010-01-15	M	South	Genital	0	37	≥30	4000
NgBox01/39	14	33	21	PIB	2010-01-15	M	South	Genital	0	23	<30	4000
NgBox01/40	2280	1329	6863	PIB	2010-01-13	F	North	Genital	0	34	≥30	4871
NgBox01/41	1840	29	3042	PIA	2010-01-12	F	North	Genital	0	20	<30	4810
NgBox01/42	4101	1330	6876	PIA	2010-01-16	F	North	Genital	0	15	<30	4870
NgBox01/43	4106	349	6888	PIB	2010-01-14	M	South	Genital	0	19	<30	4053
NgBox01/44	2280	1329	6863	PIB	2010-01-19	M	North	Genital	0	74	≥30	4869
NgBox01/45	262	1332	6880	PIB	2010-01-16	M	South	Genital	0	25	<30	4012
NgBox01/46	4	28	6882	PIB	2010-01-20	M	South	Genital	0	39	≥30	4152
NgBox01/47	4	28	6882	PIB	2010-01-20	M	South	Genital	0	28	<30	4005
NgBox01/48	4107	110	6889	PIB	2010-01-21	M	South	Anorectal	0	20	<30	4171
NgBox01/49	1582	28	6890	PIB	2010-01-20	F	South	Genital	0	17	<30	4215
NgBox01/50	4108	1330	6891	PIA	2010-01-22	M	North	Genital	0	18	<30	4870
NgBox01/51	4106	349	6888	PIB	2010-01-21	M	South	Genital	0	24	<30	4169
NgBox01/52	4109	23	6892	PIA	2010-01-31	M		Genital	0	69	≥30	4660
NgBox01/53	242	28	6893	PIB	2010-01-30	F	South	Genital	0	47	≥30	4069
NgBox01/54	1907	4	3150	PIB	2010-01-24	M		Genital	0	22	<30	2488
NgBox01/55	4110	33	6894	PIB	2010-01-27	M	South	Genital	0	23	<30	4030
NgBox01/56	4111	21	6895	PIB	2010-01-25	M	North	Genital	0	51	≥30	4870
NgBox01/57	4099	349	6879	PIB	2010-01-27	F	North	Genital	0	19	<30	4821
NgBox01/58	4112	27	6896	PIA	2010-01-27	F	North	Genital	0	22	<30	4871
NgBox01/59	4101	1330	6876	PIA	2010-01-29	M	North	Genital	0	15	<30	4865
NgBox01/60	1840	29	3042	PIA	2010-02-02	F	North	Genital	0	20	<30	4810
NgBox01/61	1891	4	3140	PIB	2010-02-05	M	South	Genital	0	23	<30	4573
NgBox01/62	2280	1329	6863	PIB	2010-02-03	F	North	Genital	0	19	<30	4875
NgBox01/63	4101	1330	6876	PIA	2010-02-10	M	North	Genital	0	18	<30	4825
NgBox01/64	2932	263	4845	PIB	2010-02-08	M		Anorectal	0	30	≥30	4740
NgBox01/65	1808	29	2992	PIB	2010-04-09	M	North	Oropharangeal	0	22	<30	4810
NgBox01/66	697	98	6897	PIA	2010-04-12	F	South	Genital	0	20	<30	4209
NgBox01/67	61	27	356	PIB	2010-04-12	F	South	Genital	0	21	<30	4207
NgBox01/69	997	137	1582	PIB	2010-04-12	M	South	Oropharangeal	0	23	<30	4161
NgBox01/70	4101	1330	6876	PIA	2010-04-14	F	North	Genital	0	20	<30	4870
NgBox01/71	4101	1330	6876	PIA	2010-04-15	M	North	Genital	0	17	<30	4860
NgBox01/72	3003	110	4951	PIB	2010-04-15	M	South	Genital	0	26	<30	4005
NgBox01/73	4101	1330	6876	PIA	2010-04-14	M	North	Genital	0	29	<30	4875
NgBox01/74	105	3	4768	PIB	2010-04-15	F	South	Genital	0	22	<30	4209
NgBox01/75	262	1332	6880	PIB	2010-04-16	M	South	Genital	0	21	<30	4059
NgBox01/77	4101	1330	6876	PIA	2010-04-19	M	North	Genital	0	17	<30	4824
NgBox01/78	227	26	190	PIB	2010-04-22	M	South	Genital	0	19	<30	4220
NgBox01/79	1808	29	2992	PIB	2010-04-16	M	North	Anorectal	0	36	≥30	4810
NgBox01/80	4101	1330	6876	PIA	2010-04-21	M	North	Genital	0	24	<30	4870
NgBox01/81	4098	349	6878	PIB	2010-04-22	M	North	Genital	0	25	<30	4870
NgBox02/01	193	27	6898	PIB	2010-04-22	M	South	Genital	0	24	<30	4000
NgBox02/02	4099	349	6879	PIB	2010-04-18	F		Genital	0	21	<30	4650
NgBox02/03	2280	1329	6863	PIB	2010-04-20	M	North	Genital	0	16	<30	4870
NgBox02/04	407	1331	6865	PIA	2010-04-19	M	North	Genital	0	18	<30	4870
NgBox02/05	4117	110	6899	PIB	2010-04-23	M	South	Genital	0	26	<30	4000
NgBox02/06	543	29	1288	PIB	2010-04-24	M	North	Genital	0	41	≥30	4870
NgBox02/07	250	4	323	PIB	2010-04-26	M	South	Genital	0	37	≥30	4309
NgBox02/08	463	27	697	PIB	2010-05-04	M	South	Genital	0	20	<30	4101
NgBox02/09	847	29	1313	PIB	2010-04-28	M	South	Genital	0	18	<30	4215
NgBox02/10	463	27	697	PIB	2010-05-12	F	North	Genital	0	16	<30	4870
NgBox02/11	4101	1330	6876	PIA	2010-05-11	M	North	Other	0	18	<30	4870
NgBox02/12	4101	1330	6876	PIA	2010-05-13	F	North	Genital	0	22	<30	4876
NgBox02/13	4101	1330	6876	PIA	2010-05-14	F	North	Genital	0	18	<30	4875
NgBox02/14	4101	1330	6876	PIA	2010-05-10	M	North	Genital	0	27	<30	4868
NgBox02/16	4123	110	6925	PIB	2010-02-23	F	South	Genital	0	41	≥30	4011
NgBox02/17	262	1332	6880	PIB	2010-02-22	M	South	Genital	0	28	<30	4158
NgBox02/18	4104	1334	6886	PIA	2010-02-22	F	North	Invasive	1	25	<30	4868
NgBox02/19	274	21	395	PIB	2010-02-23	M	South	Anorectal	0	19	<30	4000
NgBox02/20	1808	29	2992	PIB	2010-02-25	M	South	Genital	0	36	≥30	4006
NgBox02/21	53	21	147	PIB	2010-02-25	M	South	Oropharangeal	0	25	<30	4215
NgBox02/22	3003	110	4951	PIB	2010-02-25	M	South	Genital	0	23	<30	4215
NgBox02/23	4112	27	6896	PIA	2010-03-01	F	South	Genital	0	19	<30	4212
NgBox02/24	227	26	190	PIB	2010-03-02	F	South	Genital	0	28	<30	4226
NgBox02/25	908	110	1407	PIB	2010-03-05	M		Other	0	23	<30	4655
NgBox02/26	4101	1330	6876	PIA	2010-03-02	M	North	Genital	0	34	≥30	4870
NgBox02/28	4101	1330	6876	PIA	2010-03-02	M	North	Genital	0	20	<30	4810
NgBox02/29	1808	29	2992	PIB	2010-03-04	M	South	Genital	0	41	≥30	4270
NgBox02/30	4124	372	6926	PIB	2010-03-04	M	South	Genital	0	27	<30	4000
NgBox02/31	4101	1330	6876	PIA	2010-03-10	M	South	Genital	0	19	<30	4030
NgBox02/32	2280	1329	6863	PIB	2010-03-09	M		Genital	0	18	<30	4670
NgBox02/33	4128	21	6927	PIB	2010-03-08	M	North	Genital	0	22	<30	4890
NgBox02/34	4104	1334	6886	PIA	2010-03-09	F	North	Genital	0	23	<30	4870
NgBox02/35	4101	1330	6876	PIA	2010-03-12	M	North	Genital	0	33	≥30	4870
NgBox02/36	4104	1334	6886	PIA	2010-03-12	F	North	Genital	0	21	<30	4870
NgBox02/37	697	295	1100	PIA	2010-03-11	M	South	Genital	0	19	<30	4000
NgBox02/39	4129	4	6928	PIB	2010-03-17	M	South	Genital	0	23	<30	4000
NgBox02/40	847	29	1313	PIB	2010-03-15	M	South	Genital	0	36	≥30	4304
NgBox02/41	4	28	6882	PIB	2010-03-19	M		Anorectal	0	34	≥30	4655
NgBox02/42	1808	29	2992	PIB	2010-03-23	M	South	Genital	0	21	<30	4011
NgBox02/43	4104	1334	6886	PIA	2010-03-16	M	North	Genital	0	19	<30	4870
NgBox02/44	4130	137	6929	PIB	2010-03-19	M		Genital	0	54	≥30	2323
NgBox02/45	90	21	436	PIA	2010-03-18	F	South	Genital	0	57	≥30	4567
NgBox02/46	4101	1330	6876	PIA	2010-03-19	F	North	Genital	0	19	<30	4871
NgBox02/47	2280	1329	6863	PIB	2010-03-22	M	North	Genital	0	34	≥30	4890
NgBox02/48	182	29	2018	PIB	2010-03-17	M	South	Genital	0	39	≥30	4118
NgBox02/49	4131	33	6930	PIB	2010-03-22	M	South	Anorectal	0	20	<30	4215
NgBox02/50	4131	33	6930	PIB	2010-03-23	M	South	Anorectal	0	29	<30	4215
NgBox02/51	2280	1329	6863	PIB	2010-03-22	M	North	Genital	0	25	<30	4870
NgBox02/52	262	1332	6880	PIB	2010-03-22	M	North	Anorectal	0	28	<30	4810
NgBox02/53	4101	1330	6876	PIA	2010-03-24	M	North	Genital	0	27	<30	4875
NgBox02/54	1903	110	3149	PIB	2010-03-24	M	South	Anorectal	0	34	≥30	4006
NgBox02/56	851	1007	6931	PIB	2010-03-23	M	South	Genital	0	44	≥30	4078
NgBox02/57	4101	1330	6876	PIA	2010-03-26	F	North	Genital	0	16	<30	4883
NgBox02/59	182	29	2018	PIB	2010-04-01	F	South	Genital	0	18	<30	4305
NgBox02/60	908	110	1407	PIB	2010-03-29	M	South	Genital	0	37	≥30	4006
NgBox02/61	182	29	2018	PIB	2010-03-22	F	South	Genital	0	22	<30	4102
NgBox02/62	1808	29	2992	PIB	2010-04-01	F	South	Genital	0	90	≥30	4005
NgBox02/63	4101	1330	6876	PIA	2010-03-29	F	North	Genital	0	22	<30	4873
NgBox02/64	1050	334	6932	PIB	2010-04-01	M		Genital	0	39	≥30	4740
NgBox02/65	2280	1329	6863	PIB	2010-04-01	M	North	Genital	0	18	<30	4870
NgBox02/66	4101	1330	6876	PIA	2010-03-29	F	North	Genital	0	28	<30	4876
NgBox02/67	4110	33	6894	PIB	2010-04-01	M	South	Oropharangeal	0	38	≥30	4006
NgBox02/68	103	1341	6933	PIA	2010-04-07	F	South	Genital	0	20	<30	4019
NgBox02/69	263	583	6881	PIB	2010-04-06	F	South	Genital	0	21	<30	4214
NgBox02/70	2073	110	3422	PIB	2010-04-07	M	South	Genital	0	21	<30	4171
NgBox02/71	2590	29	4215	PIA	2010-04-06	M	South	Genital	0	20	<30	4000
NgBox02/72	1808	29	2992	PIB	2010-04-06	M	South	Other	0	25	<30	4005
NgBox02/74	3003	110	4951	PIB	2010-04-06	M	South	Anorectal	0	23	<30	4215
NgBox02/76	4101	1330	6876	PIA	2010-04-07	M	North	Genital	0	20	<30	4825
NgBox02/77	105	3	4768	PIB	2010-04-09	F	South	Genital	0	21	<30	4154
NgBox02/78	301	29	359	PIB	2010-04-09	M	South	Genital	0	27	<30	4000
NgBox02/79	4101	1330	6876	PIA	2010-04-07	M	North	Genital	0	25	<30	4817
NgBox02/80	908	110	1407	PIB	2010-05-17	M	South	Oropharangeal	0	25	<30	4215
NgBox02/81	14	33	21	PIB	2010-05-14	M	South	Oropharangeal	0	20	<30	4034
NgBox03/02	1785	110	2958	PIB	2010-05-24	M	South	Genital	0	21	<30	4109
NgBox03/03	1808	29	2992	PIB	2010-05-24	M	South	Anorectal	0	23	<30	4030
NgBox03/04	904	349	1415	PIB	2010-05-18	F	South	Genital	0	15	<30	4114
NgBox03/05	4143	29	6940	PIB	2010-05-18	M	South	Genital	0	56	≥30	4005
NgBox03/06	908	110	1407	PIB	2010-05-18	M	South	Genital	0	25	<30	4114
NgBox03/07	147	349	7126	PIA	2010-05-20	F		Genital	0	23	<30	4606
NgBox03/08	4101	1330	6876	PIA	2010-05-19	F	North	Genital	0	27	<30	4814
NgBox03/09	105	3	4768	PIB	2010-05-21	M		Genital	0	21	<30	4700
NgBox03/10	1808	29	2992	PIB	2010-05-18	M	South	Genital	0	60	≥30	4005
NgBox03/11	1808	29	2992	PIB	2010-05-18	M	North	Anorectal	0	56	≥30	4870
NgBox03/12	4267	33	7127	PIB	2010-05-19	M	South	Genital	0	23	<30	4116
NgBox03/13	4101	1334	6939	PIA	2010-05-19	F	North	Genital	0	21	<30	4878
NgBox03/14	4104	1334	6886	PIA	2010-05-21	M		Genital	0	21	<30	4670
NgBox03/15	123	1007	7128	PIA	2010-05-21	M		Genital	0	52	≥30	2478
NgBox03/16	4	28	6882	PIB	2010-05-25	M	South	Anorectal	0	28	<30	4215
NgBox03/18	4	4	225	PIB	2010-05-24	M	South	Anorectal	0	21	<30	4170
NgBox03/19	227	26	190	PIB	2010-05-18	M	South	Genital	0	18	<30	4221
NgBox03/21	4268	19	7129	PIB	2010-05-20	F	South	Genital	0	20	<30	4078
NgBox03/22	90	1371	7130	PIA	2010-05-22	M	North	Genital	0	44	≥30	4872
NgBox03/23	90	272	1398	PIA	2010-05-24	M	North	Genital	0	57	≥30	4870
NgBox03/24	4101	1330	6876	PIA	2010-05-29	M	North	Genital	0	20	<30	4815
NgBox03/25	262	1332	6880	PIB	2010-05-26	M	South	Other	0	19	<30	4128
NgBox03/26	904	349	1415	PIB	2010-05-27	F	South	Genital	0	15	<30	4114
NgBox03/27	90	1371	7130	PIA	2010-05-25	F	North	Genital	0	21	<30	4883
NgBox03/28	908	110	1407	PIB	2010-05-25	M	North	Anorectal	0	24	<30	4870
NgBox03/29	2280	1329	6863	PIB	2010-05-25	M	North	Genital	0	24	<30	4874
NgBox03/30	1840	29	3042	PIA	2010-05-27	M	North	Genital	0	20	<30	4850
NgBox03/31	4101	1330	6876	PIA	2010-05-26	F	North	Genital	0	26	<30	4875
NgBox03/33	105	3	4768	PIB	2010-05-27	M	South	Genital	0	27	<30	4215
NgBox03/34	4	137	1739	PIB	2010-05-24	M	South	Oropharangeal	0	22	<30	4169
NgBox03/35	908	110	1407	PIB	2010-05-28	M	South	Genital	0	32	≥30	4215
NgBox03/36	908	110	1407	PIB	2010-05-26	M	South	Genital	0	27	<30	4207
NgBox03/37	4142	26	7125	PIB	2010-05-27	M	South	Anorectal	0	37	≥30	4005
NgBox03/38	53	21	147	PIB	2010-05-26	M	South	Oropharangeal	0	32	≥30	4000
NgBox03/39	1840	29	3042	PIA	2010-05-31	M	North	Genital	0	19	<30	4871
NgBox03/40	1808	29	2992	PIB	2010-06-04	F		Genital	0	54	≥30	2478
NgBox03/41	4143	29	6940	PIB	2010-05-26	M	South	Anorectal	0	27	<30	4005
NgBox03/42	227	26	190	PIB	2010-05-28	F	South	Genital	0	23	<30	4000
NgBox03/43	2280	1329	6863	PIB	2010-05-31	F	North	Genital	0	37	≥30	4875
NgBox03/44	4144	186	6941	PIB	2010-05-31	M	South	Genital	0	26	<30	4000
NgBox03/45	1785	110	2958	PIB	2010-06-02	M	South	Genital	0	26	<30	4128
NgBox03/46	904	349	1415	PIB	2010-06-03	M	South	Genital	0	32	≥30	4031
NgBox03/47	53	21	147	PIB	2010-06-03	M	South	Genital	0	25	<30	4215
NgBox03/48	4145	1330	6942	PIA	2010-05-31	M	North	Genital	0	28	<30	4811
NgBox03/49	4146	1344	6943	PIB	2010-05-31	F	North	Genital	0	20	<30	4810
NgBox03/50	4147	1329	6944	PIB	2010-05-31	M	North	Other	0	25	<30	4875
NgBox03/51	4101	1330	6876	PIA	2010-06-03	M	North	Genital	0	23	<30	4825
NgBox03/52	147	1345	6945	PIA	2010-06-03	M	North	Genital	0	21	<30	4825
NgBox03/53	4099	349	6879	PIB	2010-05-27	F		Genital	0	18	<30	4605
NgBox03/54	193	27	6898	PIB	2010-06-01	M	South	Genital	0	24	<30	4000
NgBox03/55	4101	1330	6876	PIA	2010-06-08	F	North	Genital	0	15	<30	4871
NgBox03/56	4143	29	6940	PIB	2010-06-04	M	South	Genital	0	23	<30	4123
NgBox03/57	1853	272	4464	PIB	2010-06-04	M	South	Genital	0	22	<30	4510
NgBox03/58	4101	1334	6939	PIA	2010-06-01	M	North	Genital	0	23	<30	4868
NgBox03/59	4101	1330	6876	PIA	2010-06-07	M	North	Genital	0	24	<30	4878
NgBox03/60	53	21	147	PIB	2010-06-09	M	South	Genital	0	20	<30	4178
NgBox03/61	1808	29	2992	PIB	2010-06-12	M	South	Genital	0	30	≥30	4011
NgBox03/62	997	60	6696	PIB	2010-06-07	F	North	Genital	0	38	≥30	4825
NgBox03/63	130	75	7133	PIB	2010-06-09	M	South	Genital	0	26	<30	4152
NgBox03/64	227	26	190	PIB	2010-06-09	F	South	Genital	0	18	<30	4157
NgBox03/65	997	137	1582	PIB	2010-06-08	F	South	Genital	0	40	≥30	4551
NgBox03/66	543	29	1288	PIB	2010-06-06	M	North	Genital	0	18	<30	4870
NgBox03/67	263	583	6881	PIB	2010-06-09	M	South	Genital	0	25	<30	4113
NgBox03/68	997	137	1582	PIB	2010-06-04	M	South	Genital	0	23	<30	4000
NgBox03/69	543	29	1288	PIB	2010-06-12	F	North	Genital	0	18	<30	4870
NgBox03/70	193	27	6898	PIB	2010-06-11	F	South	Genital	0	24	<30	4034
NgBox03/71	908	110	1407	PIB	2010-06-08	M	South	Anorectal	0	28	<30	4000
NgBox03/72	4101	1330	6876	PIA	2010-06-09	M	North	Eye	0	16	<30	4810
NgBox03/73	4269	137	7131	PIB	2010-06-07	M	North	Oropharangeal	0	58	≥30	4870
NgBox03/74	4101	1330	6876	PIA	2010-06-04	M	North	Genital	0	23	<30	4875
NgBox03/75	4270	129	7132	PIB	2010-06-08	M	South	Genital	0	41	≥30	4114
NgBox03/76	130	75	7133	PIB	2010-06-13	F	South	Other	0	24	<30	4300
NgBox03/77	4271	386	7134	PIA	2010-06-16	M	South	Genital	0	61	≥30	4225
NgBox03/78	158	29	3929	PIB	2010-06-15	M	South	Genital	0	36	≥30	4074
NgBox03/79	158	29	3929	PIB	2010-06-15	F	South	Genital	0	33	≥30	4074
NgBox03/80	14	33	21	PIB	2010-06-11	M	South	Genital	0	22	<30	4005
NgBox03/81	262	1332	6880	PIB	2010-06-10	M	South	Genital	0	27	<30	4000
NgBox04/01	1808	29	2992	PIB	2010-06-15	M	South	Other	0	30	≥30	4077
NgBox04/02	4099	349	6879	PIB	2010-06-09	M	North	Genital	0	16	<30	4816
NgBox04/03	1808	29	2992	PIB	2010-06-15	M	South	Anorectal	0	23	<30	4215
NgBox04/04	4272	1372	7135	PIA	2010-06-16	M	North	Genital	0	55	≥30	4824
NgBox04/05	251	136	368	PIA	2010-06-16	M		Genital	0	39	≥30	4737
NgBox04/06	105	3	4768	PIB	2010-06-16	M		Genital	0	23	<30	4701
NgBox04/07	463	27	697	PIB	2010-06-15	F	South	Genital	0	19	<30	4000
NgBox04/09	4101	1330	6876	PIA	2010-06-17	M	North	Genital	0	26	<30	4870
NgBox04/10	4104	1334	6886	PIA	2010-06-17	F	North	Genital	0	17	<30	4870
NgBox04/11	2280	1329	6863	PIB	2010-06-17	M	North	Genital	0	17	<30	4874
NgBox04/12	4274	1329	7137	PIB	2010-06-17	F	North	Genital	0	17	<30	4874
NgBox04/13	4104	1334	6886	PIA	2010-06-16	F	North	Invasive	1	16	<30	4895
NgBox04/15	4101	1330	6876	PIA	2010-06-18	F	North	Genital	0	27	<30	4870
NgBox04/16	4101	1330	6876	PIA	2010-06-18	M	North	Genital	0	28	<30	4870
NgBox04/17	4101	1330	6876	PIA	2010-06-18	M	North	Genital	0	21	<30	4810
NgBox04/18	4101	1330	6876	PIA	2010-06-18	F	North	Genital	0	22	<30	4810
NgBox04/20	4275	1373	7138	PIB	2010-06-28	F		Genital	0	22	<30	2480
NgBox04/21	4104	1334	6886	PIA	2010-06-28	M	North	Genital	0	25	<30	4812
NgBox04/22	1808	29	2992	PIB	2010-06-22	M	South	Anorectal	0	24	<30	4005
NgBox04/23	908	110	1407	PIB	2010-06-23	M	South	Anorectal	0	23	<30	4215
NgBox04/24	301	29	359	PIB	2010-06-22	M		Genital	0	44	≥30	2484
NgBox04/25	4101	1330	6876	PIA	2010-06-21	F	North	Genital	0	15	<30	4816
NgBox04/27	4101	1330	6876	PIA	2010-06-23	M	North	Genital	0	27	<30	4881
NgBox04/28	2280	1329	6863	PIB	2010-06-22	M	North	Genital	0	29	<30	4870
NgBox04/29	4101	1330	6876	PIA	2010-06-23	M	North	Genital	0	35	≥30	4815
NgBox04/30	463	27	697	PIB	2010-06-22	F	South	Genital	0	19	<30	4075
NgBox04/31	997	58	3750	PIB	2010-06-24	M	South	Genital	0	52	≥30	4159
NgBox04/32	4284	1376	7168	PIA	2010-06-25	M	South	Genital	0	20	<30	4207
NgBox04/33	847	29	1313	PIB	2010-06-25	M	South	Genital	0	48	≥30	4151
NgBox04/34	4285	294	7169	PIB	2010-06-26	M		Genital	0	25	<30	2000
NgBox04/35	488	1377	7170	PIB	2010-06-25	F	South	Genital	0	39	≥30	4507
NgBox04/36	4143	29	6940	PIB	2010-06-18	M	South	Oropharangeal	0	27	<30	4000
NgBox04/37	4101	1330	6876	PIA	2010-06-24	F	North	Genital	0	18	<30	4871
NgBox04/38	4286	28	7171	PIB	2010-06-28	M	South	Anorectal	0	25	<30	4059
NgBox04/39	1808	29	2992	PIB	2010-06-24	M	South	Anorectal	0	28	<30	4000
NgBox04/40	14	33	21	PIB	2010-06-25	M	South	Genital	0	19	<30	4109
NgBox04/41	4101	1330	6876	PIA	2010-06-28	M	North	Genital	0	33	≥30	4810
NgBox04/42	227	26	190	PIB	2010-06-29	M	South	Genital	0	24	<30	4211
NgBox04/43	301	29	359	PIB	2010-06-30	F	South	Genital	0	44	≥30	4017
NgBox04/44	407	1331	6865	PIA	2010-06-29	F	North	Genital	0	20	<30	4870
NgBox04/45	263	583	6881	PIB	2010-07-01	M	South	Genital	0	20	<30	4032
NgBox04/46	14	74	7172	PIB	2010-07-01	M	South	Genital	0	21	<30	4030
NgBox04/47	250	4	323	PIB	2010-07-02	M	South	Genital	0	18	<30	4215
NgBox04/48	1808	29	2992	PIB	2010-06-28	M	North	Oropharangeal	0	24	<30	4810
NgBox04/49	4290	903	7173	PIB	2010-06-29	M	South	Genital	0	38	≥30	4504
NgBox04/50	4291	135	7174	PIB	2010-07-01	F		Genital	0	22	<30	O/S
NgBox04/51	785	60	3611	PIB	2010-07-05	M	South	Genital	0	25	<30	4169
NgBox04/52	4292	35	7175	PIB	2010-07-10	F	South	Genital	0	24	<30	4500
NgBox04/53	14	33	21	PIB	2010-07-05	M	South	Anorectal	0	32	≥30	4119
NgBox04/54	4293	33	7176	PIB	2010-07-07	M	South	Genital	0	21	<30	4051
NgBox04/55	4	28	6882	PIB	2010-07-07	M	South	Anorectal	0	46	≥30	4011
NgBox04/56	402	58	7177	PIA	2010-07-07	M	South	Genital	0	21	<30	4014
NgBox04/57	4294	6	7178	PIB	2010-06-24	F	South	Genital	0	15	<30	4114
NgBox04/58	4112	1284	7179	PIA	2010-06-30	M	North	Genital	0	19	<30	4874
NgBox04/59	4101	1330	6876	PIA	2010-07-07	F	North	Genital	0	15	<30	4875
NgBox04/60	4295	108	7180	PIB	2010-07-04	F	South	Genital	0	34	≥30	4217
NgBox04/61	14	33	21	PIB	2010-07-07	M	South	Genital	0	28	<30	4123
NgBox04/62	301	29	359	PIB	2010-07-06	M	North	Genital	0	34	≥30	4814
NgBox04/63	4101	1330	6876	PIA	2010-07-06	M	North	Genital	0	19	<30	4870
NgBox04/64	4143	29	6940	PIB	2010-07-08	M	South	Genital	0	25	<30	4000
NgBox04/65	4101	1330	6876	PIA	2010-07-09	M	North	Genital	0	27	<30	4876
NgBox04/66	262	1332	6880	PIB	2010-07-13	M	South	Anorectal	0	28	<30	4031
NgBox04/67	1808	29	2992	PIB	2010-07-15	F	South	Genital	0	53	≥30	4350
NgBox04/68	4274	1329	7137	PIB	2010-07-13	M	North	Genital	0	50	≥30	4874
NgBox04/69	1808	29	2992	PIB	2010-07-19	F		Genital	0	42	≥30	2477
NgBox04/70	697	295	1100	PIA	2010-07-14	M	South	Genital	0	27	<30	4101
NgBox04/71	4101	1330	6876	PIA	2010-07-13	M	North	Genital	0	16	<30	4865
NgBox04/72	4104	1334	6886	PIA	2010-07-16	M	South	Genital	0	17	<30	4068
NgBox04/73	922	355	1431	PIB	2010-07-15	M	South	Genital	0	50	≥30	4000
NgBox04/74	908	110	1407	PIB	2010-07-16	F	South	Genital	0	49	≥30	4129
NgBox04/75	1449	29	3288	PIB	2010-07-15	M	South	Other	0	19	<30	4131
NgBox04/76	4147	1329	6944	PIB	2010-07-13	M	North	Genital	0	19	<30	4875
NgBox04/77	2280	1329	6863	PIB	2010-07-14	F	North	Genital	0	16	<30	4870
NgBox04/78	4098	1329	7181	PIB	2010-07-15	M	North	Genital	0	25	<30	4825
NgBox04/79	2280	1329	6863	PIB	2010-07-14	M	North	Genital	0	17	<30	4875
NgBox04/81	847	29	1313	PIB	2010-07-13	M	South	Oropharangeal	0	22	<30	4000
NgBox05/02	847	29	1313	PIB	2010-07-16	M	South	Anorectal	0	24	<30	4068
NgBox05/05	4297	33	7182	PIB	2010-07-21	M	South	Anorectal	0	36	≥30	4215
NgBox05/06	861	495	4232	PIB	2010-07-21	M	South	Genital	0	22	<30	4215
NgBox05/07	263	583	6881	PIB	2010-07-22	F	South	Genital	0	19	<30	4503
NgBox05/08	908	110	1407	PIB	2010-07-21	M		Anorectal	0	23	<30	4740
NgBox05/09	4101	1334	6939	PIA	2010-07-21	M	North	Genital	0	18	<30	4875
NgBox05/10	2280	1329	6863	PIB	2010-07-21	F	North	Genital	0	23	<30	4875
NgBox05/11	182	29	2018	PIB	2010-07-23	F	South	Genital	0	18	<30	4207
NgBox05/12	908	110	1407	PIB	2010-07-19	F	South	Genital	0	58	≥30	4217
NgBox05/13	908	110	1407	PIB	2010-07-21	M	South	Genital	0	19	<30	4000
NgBox05/14	4104	1334	6886	PIA	2010-07-19	F	North	Genital	0	25	<30	4868
NgBox05/15	812	1378	7183	PIB	2010-07-22	M	South	Genital	0	60	≥30	4212
NgBox05/16	908	110	1407	PIB	2010-07-14	M	North	Genital	0	22	<30	4810
NgBox05/17	4298	21	7184	PIA	2010-07-27	M	South	Genital	0	51	≥30	4020
NgBox05/18	3283	1129	5411	PIB	2010-07-27	M	South	Genital	0	26	<30	4109
NgBox05/19	4101	1330	6876	PIA	2010-07-27	F	North	Genital	0	38	≥30	4815
NgBox05/20	4101	1330	6876	PIA	2010-07-26	M	North	Genital	0	34	≥30	4870
NgBox05/21	4099	349	6879	PIB	2010-07-28	F	North	Genital	0	15	<30	4816
NgBox05/22	4099	349	6879	PIB	2010-07-27	M	North	Genital	0	30	≥30	4810
NgBox05/23	997	1379	7185	PIB	2010-07-30	M	South	Genital	0	45	≥30	4101
NgBox05/24	2280	1329	6863	PIB	2010-07-29	M	North	Genital	0	27	<30	4875
NgBox05/25	4101	1330	6876	PIA	2010-07-28	M	North	Genital	0	16	<30	4875
NgBox05/26	4299	98	7186	PIB	2010-08-03	M	South	Genital	0	47	≥30	4078
NgBox05/27	543	110	1405	PIB	2010-08-03	M	South	Genital	0	45	≥30	4114
NgBox05/28	4	4	225	PIB	2010-08-04	M	South	Anorectal	0	17	<30	4215
NgBox05/29	543	110	1405	PIB	2010-08-04	M	North	Other	0	29	<30	4871
NgBox05/30	4099	349	6879	PIB	2010-08-02	M	South	Genital	0	32	≥30	4018
NgBox05/31	4300	110	7187	PIB	2010-08-04	M	South	Genital	0	36	≥30	4000
NgBox05/32	182	29	2018	PIB	2010-08-02	M	South	Genital	0	21	<30	4106
NgBox05/33	301	29	359	PIB	2010-08-04	M		Anorectal	0	33	≥30	4740
NgBox05/34	4101	1330	6876	PIA	2010-08-02	M		Genital	0	18	<30	870
NgBox05/35	1808	29	2992	PIB	2010-08-06	M	South	Genital	0	26	<30	4000
NgBox05/36	103	835	7188	PIA	2010-08-05	F	North	Genital	0	33	≥30	4868
NgBox05/37	4101	1330	6876	PIA	2010-08-04	M	North	Genital	0	25	<30	4870
NgBox05/38	30	35	40	PIB	2010-08-03	M	South	Genital	0	22	<30	4122
NgBox05/39	2280	1329	6863	PIB	2010-08-03	F	North	Genital	0	19	<30	4876
NgBox05/40	227	26	190	PIB	2010-08-07	M	South	Genital	0	17	<30	4218
NgBox05/41	4301	1178	7189	PIA	2010-08-05	M	North	Genital	0	18	<30	4870
NgBox05/42	4101	1330	6876	PIA	2010-08-02	M	North	Genital	0	28	<30	4869
NgBox05/43	4302	1334	7190	PIA	2010-08-02	M	North	Genital	0	26	<30	4870
NgBox05/44	3141	444	5183	PIB	2010-08-06	M	South	Genital	0	26	<30	4215
NgBox05/45	14	33	21	PIB	2010-08-05	M	South	Genital	0	19	<30	4000
NgBox05/46	4450	186	7679	PIB	2010-08-05	F	South	Genital	0	53	≥30	4219
NgBox05/47	2280	1329	6863	PIB	2010-08-11	M	South	Genital	0	16	<30	4305
NgBox05/49	904	349	1415	PIB	2010-08-13	F	North	Genital	0	20	<30	4815
NgBox05/50	4101	1330	6876	PIA	2010-08-09	M	North	Genital	0	24	<30	4875
NgBox05/51	4	4	225	PIB	2010-08-09	M	South	Genital	0	18	<30	4000
NgBox05/52	4267	33	7127	PIB	2010-08-09	F	South	Genital	0	18	<30	4502
NgBox05/53	4101	1330	6876	PIA	2010-08-10	M	North	Genital	0	18	<30	4874
NgBox05/54	4104	1334	6886	PIA	2010-08-12	M	North	Genital	0	30	≥30	4875
NgBox05/55	4099	349	6879	PIB	2010-08-09	M		Other	0	22	<30	4700
NgBox05/56	4143	29	6940	PIB	2010-08-06	M	North	Anorectal	0	64	≥30	4810
NgBox05/58	182	29	2018	PIB	2010-08-11	M	South	Genital	0	55	≥30	4074
NgBox05/59	4101	1330	6876	PIA	2010-08-12	F	North	Genital	0	17	<30	4876
NgBox05/60	4609	334	7673	PIB	2010-08-11	M	North	Genital	0	26	<30	4810
NgBox05/61	4098	349	6878	PIB	2010-08-10	M		Genital	0	19	<30	4740
NgBox05/62	4143	29	6940	PIB	2010-08-12	M	South	Anorectal	0	26	<30	4007
NgBox05/64	908	110	1407	PIB	2010-08-12	M	South	Anorectal	0	37	≥30	4019
NgBox05/65	4101	1330	6876	PIA	2010-08-16	F	North	Genital	0	19	<30	4870
NgBox05/66	4099	349	6879	PIB	2010-08-13	M		Genital	0	14	<30	4700
NgBox05/67	908	110	1407	PIB	2010-08-14	M	South	Genital	0	24	<30	4060
NgBox05/68	4101	1329	7209	PIA	2010-08-18	M	North	Genital	0	67	≥30	4814
NgBox05/69	103	1444	7680	PIA	2010-08-18	F	South	Genital	0	48	≥30	4211
NgBox05/70	2280	1329	6863	PIB	2010-08-16	F	North	Genital	0	25	<30	4875
NgBox05/71	4101	1330	6876	PIA	2010-08-16	M	North	Genital	0	21	<30	4875
NgBox05/72	847	29	1313	PIB	2010-08-16	M	South	Genital	0	30	≥30	4012
NgBox05/73	19	25	5268	PIB	2010-08-16	M	South	Genital	0	25	<30	4000
NgBox05/74	908	110	1407	PIB	2010-08-16	M	South	Genital	0	26	<30	4171
NgBox05/76	4112	1284	7179	PIA	2010-08-17	M	North	Genital	0	18	<30	4860
NgBox05/77	4101	1330	6876	PIA	2010-08-19	M	North	Genital	0	30	≥30	4870
NgBox05/78	4104	1334	6886	PIA	2010-08-17	M	North	Genital	0	17	<30	4870
NgBox05/79	4101	1330	6876	PIA	2010-05-06	F	North	Genital	0	15	<30	4810
NgBox05/80	908	110	1407	PIB	2010-05-10	M	South	Genital	0	44	≥30	4217
NgBox05/81	4099	349	6879	PIB	2010-04-21	M	North	Genital	0	16	<30	4811
NgBox06/01	14	28	7815	PIB	2010-05-10	M	South	Genital	0	22	<30	4020
NgBox06/02	4612	1329	7816	PIB	2010-05-05	M	North	Genital	0	24	<30	4875
NgBox06/03	4101	1330	6876	PIA	2010-05-07	M	North	Other	0	23	<30	4875
NgBox06/04	227	26	190	PIB	2010-05-07	F	South	Genital	0	21	<30	4558
NgBox06/05	3059	29	5049	PIB	2010-05-06	M	South	Genital	0	20	<30	4020
NgBox06/06	463	27	697	PIB	2010-05-07	M	South	Genital	0	18	<30	4034
NgBox06/07	4613	1329	7817	PIB	2010-05-10	M	North	Genital	0	34	≥30	4870
NgBox06/08	193	27	6898	PIB	2010-05-12	M	South	Genital	0	28	<30	4120
NgBox06/10	908	110	1407	PIB	2010-05-13	M	South	Oropharangeal	0	37	≥30	4005
NgBox06/11	263	583	6881	PIB	2010-05-13	M	South	Oropharangeal	0	37	≥30	4005
NgBox06/12	908	110	1407	PIB	2010-01-21	M	South	Anorectal	0	20	<30	4171
NgBox06/13	463	27	697	PIB	2010-01-20	M	South	Genital	0	19	<30	4101
NgBox06/15	2280	1329	6863	PIB	2010-01-29	F		Genital	0	36	≥30	4740
NgBox06/16	4101	1330	6876	PIA	2010-01-19	M	North	Genital	0	16	<30	4870
NgBox06/17	2280	1329	6863	PIB	2010-01-25	F	North	Genital	0	17	<30	4870
NgBox06/18	407	1331	6865	PIA	2010-01-25	F	North	Genital	0	15	<30	4870
NgBox06/19	103	350	7818	PIA	2010-01-29	M	South	Genital	0	29	<30	4215
NgBox06/20	4101	1330	6876	PIA	2010-01-28	F	North	Genital	0	17	<30	4875
NgBox06/21	4128	21	6927	PIB	2010-01-27	M	North	Genital	0	23	<30	4890
NgBox06/22	908	110	1407	PIB	2010-01-29	M	South	Oropharangeal	0	20	<30	4005
NgBox06/23	2280	1329	6863	PIB	2010-01-27	M	North	Genital	0	15	<30	4876
NgBox06/24	227	26	190	PIB	2010-02-02	M	South	Genital	0	25	<30	4215
NgBox06/25	4614	1332	7819	PIB	2010-02-05	M	South	Anorectal	0	26	<30	4350
NgBox06/26	908	110	1407	PIB	2010-02-04	M	South	Genital	0	38	≥30	4210
NgBox06/27	105	3	4768	PIB	2010-02-03	F	South	Genital	0	17	<30	4214
NgBox06/28	4101	1330	6876	PIA	2010-02-03	M	North	Genital	0	17	<30	4825
NgBox06/29	262	1332	6880	PIB	2010-02-02	M	South	Anorectal	0	34	≥30	4000
NgBox06/31	95	349	7820	PIB	2010-02-02	M	North	Genital	0	23	<30	4868
NgBox06/32	2280	1329	6863	PIB	2010-02-02	F		Genital	0	28	<30	4701
NgBox06/33	1808	29	2992	PIB	2010-02-04	M	South	Genital	0	24	<30	4078
NgBox06/35	262	1332	6880	PIB	2010-02-08	M	South	Genital	0	28	<30	4030
NgBox06/36	105	3	4768	PIB	2010-02-04	F		Genital	0	19	<30	O/S
NgBox06/37	2280	1329	6863	PIB	2010-02-01	M	North	Genital	0	17	<30	4875
NgBox06/39	2280	1329	6863	PIB	2010-02-01	F	North	Genital	0	17	<30	4875
NgBox06/40	2280	1329	6863	PIB	2010-02-08	M	North	Genital	0	31	≥30	4878
NgBox06/41	1907	4	3150	PIB	2010-02-08	M	South	Genital	0	27	<30	4215
NgBox06/42	1808	29	2992	PIB	2010-02-04	M	South	Anorectal	0	18	<30	4560
NgBox06/43	4101	1330	6876	PIA	2010-02-11	M	North	Genital	0	17	<30	4870
NgBox06/44	1457	4	7821	PIB	2010-02-12	M	South	Other	0	25	<30	4000
NgBox06/45	407	1331	6865	PIA	2010-02-12	F	North	Invasive	1	20	<30	4868
NgBox06/46	4101	1330	6876	PIA	2010-02-12	M	North	Genital	0	24	<30	4871
NgBox06/47	787	33	7822	PIB	2010-02-10	M	South	Genital	0	39	≥30	4129
NgBox06/48	263	1470	7823	PIB	2010-02-14	M	South	Genital	0	20	<30	4118
NgBox06/49	263	26	384	PIB	2010-02-16	M	South	Genital	0	24	<30	4215
NgBox06/50	250	4	323	PIB	2010-02-15	F	South	Genital	0	23	<30	4218
NgBox06/51	908	110	1407	PIB	2010-02-18	M	South	Genital	0	23	<30	4215
NgBox06/52	262	1332	6880	PIB	2010-02-16	M	South	Genital	0	37	≥30	4170
NgBox06/53	4106	349	6888	PIB	2010-02-16	M	South	Genital	0	24	<30	4017
NgBox06/54	908	110	1407	PIB	2010-02-22	M	South	Genital	0	39	≥30	4225
NgBox06/55	4101	1329	7209	PIA	2010-02-16	M	North	Genital	0	20	<30	4816
NgBox06/56	4099	349	6879	PIB	2010-02-11	F		Genital	0	18	<30	4605
NgBox06/57	2078	110	3431	PIB	2010-02-12	M	South	Anorectal	0	22	<30	4059
NgBox06/58	2280	1329	6863	PIB	2010-02-17	M	North	Genital	0	33	≥30	4870
NgBox06/59	4101	1330	6876	PIA	2010-02-16	F	North	Genital	0	30	≥30	4870
NgBox06/60	4335	1393	7262	PIB	2010-02-17	M	South	Genital	0	20	<30	4503
NgBox06/61	2280	1329	6863	PIB	2010-02-16	M	North	Genital	0	27	<30	4870
NgBox06/62	2280	1329	6863	PIB	2010-02-19	M		Genital	0	18	<30	4670
NgBox06/63	4	4	225	PIB	2010-02-19	M	South	Genital	0	24	<30	4301
NgBox06/64	4101	1330	6876	PIA	2010-02-19	F	North	Genital	0	15	<30	4878
NgBox06/65	4101	1330	6876	PIA	2010-02-18	F	North	Genital	0	30	≥30	4870
NgBox06/67	4101	1330	6876	PIA	2010-02-18	F	North	Genital	0	16	<30	4870
NgBox06/68	908	110	1407	PIB	2010-02-15	M	South	Oropharangeal	0	18	<30	4018
NgBox06/69	262	1332	6880	PIB	2010-02-18	M	South	Anorectal	0	26	<30	4000
NgBox06/70	1840	29	3042	PIA	2010-03-29	F	North	Genital	0	21	<30	4825
NgBox06/71	4263	1394	7263	PIA	2010-03-31	M		Genital	0	30	≥30	4700
NgBox06/74	2280	1329	6863	PIB	2010-04-06	F	North	Invasive	1	21	<30	4875
NgBox06/75	4	28	6882	PIB	2010-04-12	M	South	Anorectal	0	26	<30	4151
NgBox06/76	4101	1330	6876	PIA	2010-04-15	M	North	Genital	0	21	<30	4876
NgBox06/77	908	110	1407	PIB	2010-04-13	M	South	Oropharangeal	0	39	≥30	4065
NgBox06/78	4	4	225	PIB	2010-04-24	F	South	Other	0	19	<30	4103
NgBox06/79	908	110	1407	PIB	2010-04-21	M	South	Genital	0	21	<30	4109
NgBox06/80	3059	29	5049	PIB	2010-04-20	M	South	Genital	0	34	≥30	4169
NgBox06/81	4101	1330	6876	PIA	2010-04-21	F	North	Genital	0	28	<30	4870
NgBox07/01	904	349	1415	PIB	2010-04-23	M	South	Other	0	19	<30	4124
NgBox07/02	1808	29	2992	PIB	2010-04-23	M	South	Anorectal	0	36	≥30	4000
NgBox07/03	3059	29	5049	PIB	2010-04-26	M	South	Genital	0	23	<30	4510
NgBox07/04	4101	1334	6939	PIA	2010-04-26	M	North	Genital	0	15	<30	4870
NgBox07/05	4104	1334	6886	PIA	2010-04-28	M	North	Eye	0	16	<30	4870
NgBox07/06	4274	1329	7137	PIB	2010-04-27	M	North	Genital	0	15	<30	4875
NgBox07/07	4101	1330	6876	PIA	2010-04-28	M	North	Genital	0	20	<30	4875
NgBox07/08	4101	1330	6876	PIA	2010-04-26	F	North	Genital	0	15	<30	4825
NgBox07/10	4337	1332	7264	PIB	2010-04-27	M	South	Genital	0	32	≥30	4103
NgBox07/11	847	29	1313	PIB	2010-04-30	M	South	Genital	0	29	<30	4169
NgBox07/12	908	110	1407	PIB	2010-05-06	M	South	Genital	0	41	≥30	4170
NgBox07/13	4101	1330	6876	PIA	2010-04-28	M	North	Eye	0	15	<30	4850
NgBox07/15	4274	1329	7137	PIB	2010-04-28	F	North	Genital	0	14	<30	4871
NgBox07/16	14	33	21	PIB	2010-04-28	M	South	Genital	0	28	<30	4209
NgBox07/17	4101	1330	6876	PIA	2010-04-30	F	North	Genital	0	33	≥30	4825
NgBox07/19	53	21	147	PIB	2010-05-07	M	South	Other	0	38	≥30	4034
NgBox07/20	4101	1329	7209	PIA	2010-04-29	F	North	Genital	0	22	<30	4816
NgBox07/21	227	26	190	PIB	2010-05-06	F	South	Genital	0	19	<30	4211
NgBox07/22	4099	349	6879	PIB	2010-04-27	M		Genital	0	17	<30	4605
NgBox07/23	997	137	1582	PIB	2010-05-05	M	North	Genital	0	47	≥30	4870
NgBox07/24	4	4	225	PIB	2010-05-13	M	South	Other	0	20	<30	4121
NgBox07/25	4099	349	6879	PIB	2010-05-07	M	North	Genital	0	18	<30	4816
NgBox07/26	1808	29	2992	PIB	2010-05-10	M	South	Anorectal	0	37	≥30	4215
NgBox07/27	4143	29	6940	PIB	2010-09-20	M	South	Oropharangeal	0	45	≥30	4006
NgBox07/28	4143	29	6940	PIB	2010-09-20	M	South	Genital	0	45	≥30	4006
NgBox07/29	904	349	1415	PIB	2010-09-21	M	North	Genital	0	43	≥30	4815
NgBox07/30	4101	1330	6876	PIA	2010-09-23	F	North	Genital	0	16	<30	4876
NgBox07/31	952	334	3873	PIB	2010-09-25	M	North	Genital	0	21	<30	4850
NgBox07/32	908	110	1407	PIB	2010-09-20	M	South	Genital	0	30	≥30	4000
NgBox07/33	182	29	2018	PIB	2010-09-24	M	South	Genital	0	37	≥30	4215
NgBox07/35	1840	29	3042	PIA	2010-09-22	M	North	Genital	0	20	<30	4870
NgBox07/36	2280	1329	6863	PIB	2010-09-23	M	North	Genital	0	14	<30	4870
NgBox07/37	4101	1330	6876	PIA	2010-09-28	F	North	Genital	0	30	≥30	4860
NgBox07/38	262	1332	6880	PIB	2010-09-22	M		Genital	0	20	<30	2477
NgBox07/39	4	28	6882	PIB	2010-09-24	M	South	Anorectal	0	30	≥30	4006
NgBox07/40	4101	1330	6876	PIA	2010-09-21	F	North	Genital	0	20	<30	4871
NgBox07/41	1840	29	3042	PIA	2010-09-24	F		Genital	0	29	<30	4700
NgBox07/42	4292	35	7175	PIB	2010-09-27	M	South	Genital	0	20	<30	4132
NgBox07/43	4292	35	7175	PIB	2010-09-26	F	South	Genital	0	16	<30	4300
NgBox07/44	904	349	1415	PIB	2010-09-27	M	North	Genital	0	31	≥30	4817
NgBox07/45	1840	29	3042	PIA	2010-09-27	M	North	Genital	0	20	<30	4825
NgBox07/46	4338	33	7265	PIB	2010-09-22	F	South	Genital	0	29	<30	4109
NgBox07/47	227	26	190	PIB	2010-09-25	F	South	Genital	0	15	<30	4157
NgBox07/48	4099	349	6879	PIB	2010-09-29	M	South	Genital	0	20	<30	4127
NgBox07/49	4339	29	7266	PIB	2010-09-27	M	South	Oropharangeal	0	23	<30	4000
NgBox07/50	4101	1395	7267	PIA	2010-09-28	M	North	Genital	0	26	<30	4825
NgBox07/51	4340	18	7268	PIB	2010-09-27	M	North	Anorectal	0	28	<30	4870
NgBox07/52	922	355	1431	PIB	2010-10-04	F	South	Genital	0	34	≥30	4064
NgBox07/53	147	197	1214	PIA	2010-09-24	F		Genital	0	23	<30	4670
NgBox07/54	182	29	2018	PIB	2010-10-01	M	South	Genital	0	23	<30	4215
NgBox07/55	227	26	190	PIB	2010-09-30	M	South	Genital	0	19	<30	4000
NgBox07/56	227	26	190	PIB	2010-09-30	F	South	Genital	0	18	<30	4000
NgBox07/57	90	29	758	PIA	2010-10-03	M	North	Invasive	1	44	≥30	4825
NgBox07/58	2764	33	7269	PIB	2010-10-07	M	South	Genital	0	44	≥30	4215
NgBox07/59	4143	29	6940	PIB	2010-10-04	M	South	Genital	0	41	≥30	4011
NgBox07/60	847	29	1313	PIB	2010-10-04	M	South	Genital	0	30	≥30	4012
NgBox07/61	182	29	2018	PIB	2010-10-06	M	South	Genital	0	30	≥30	4215
NgBox07/62	904	349	1415	PIB	2010-10-04	M	North	Genital	0	25	<30	4815
NgBox07/63	4101	1330	6876	PIA	2010-09-30	F	North	Genital	0	26	<30	4876
NgBox07/64	4101	1330	6876	PIA	2010-10-01	F	North	Genital	0	20	<30	4870
NgBox07/65	4101	1329	7209	PIA	2010-10-07	F	North	Genital	0	18	<30	4816
NgBox07/66	4292	35	7175	PIB	2010-10-07	F	South	Genital	0	19	<30	4010
NgBox07/67	4101	1334	6939	PIA	2010-10-07	M	South	Genital	0	20	<30	4210
NgBox07/68	4101	1330	6876	PIA	2010-10-05	M	North	Genital	0	29	<30	4876
NgBox07/69	4	28	6882	PIB	2010-10-07	M	South	Anorectal	0	24	<30	4215
NgBox07/71	227	26	190	PIB	2010-10-07	F		Genital	0	18	<30	2471
NgBox07/72	4101	1334	6939	PIA	2010-10-08	F	North	Invasive	1	15	<30	4870
NgBox07/73	847	29	1313	PIB	2010-10-07	M	South	Anorectal	0	20	<30	4034
NgBox07/74	4101	1330	6876	PIA	2010-10-08	F	North	Genital	0	29	<30	4825
NgBox07/75	4341	1329	7270	PIB	2010-10-08	M	South	Genital	0	23	<30	4215
NgBox07/76	4594	26	7641	PIB	2010-10-09	M	North	Genital	0	20	<30	4870
NgBox07/77	4101	1330	6876	PIA	2010-10-08	F	North	Genital	0	25	<30	4870
NgBox07/78	14	33	21	PIB	2010-10-12	M	South	Genital	0	26	<30	4034
NgBox07/79	4595	33	7642	PIB	2010-10-11	M	South	Oropharangeal	0	20	<30	4215
NgBox07/80	4143	29	6940	PIB	2010-10-11	M	South	Genital	0	57	≥30	4064
NgBox07/81	4143	29	6940	PIB	2010-10-08	M	North	Genital	0	18	<30	4870
NgBox08/01	90	29	758	PIA	2010-10-12	F	North	Genital	0	35	≥30	4825
NgBox08/02	30	35	40	PIB	2010-10-12	M	South	Genital	0	27	<30	4000
NgBox08/03	4605	4	7668	PIB	2010-10-10	M	South	Genital	0	30	≥30	4172
NgBox08/04	4	28	6882	PIB	2010-10-19	M	South	Genital	0	25	<30	4074
NgBox08/05	997	1379	7185	PIB	2010-10-16	M	South	Anorectal	0	26	<30	4051
NgBox08/06	908	110	1407	PIB	2010-10-19	M		Anorectal	0	32	≥30	4740
NgBox08/07	4101	1330	6876	PIA	2010-10-13	F		Genital	0	28	<30	4605
NgBox08/08	1840	29	3042	PIA	2010-10-18	F	North	Genital	0	18	<30	4870
NgBox08/09	4101	1330	6876	PIA	2010-10-19	M	North	Genital	0	25	<30	4880
NgBox08/10	904	349	1415	PIB	2010-10-19	M	North	Genital	0	47	≥30	4810
NgBox08/11	4143	29	6940	PIB	2010-10-22	M	South	Anorectal	0	47	≥30	4000
NgBox08/14	847	29	1313	PIB	2010-10-22	M	South	Anorectal	0	29	<30	4066
NgBox08/15	4606	29	7669	PIB	2010-10-20	F	South	Genital	0	60	≥30	4020
NgBox08/17	4101	1330	6876	PIA	2010-10-21	F	North	Genital	0	40	≥30	4870
NgBox08/18	4	28	6882	PIB	2010-10-26	F	South	Genital	0	18	<30	4305
NgBox08/19	263	26	384	PIB	2010-10-27	M	South	Genital	0	22	<30	4061
NgBox08/20	4292	35	7175	PIB	2010-10-21	F	South	Genital	0	18	<30	4122
NgBox08/21	103	94	4994	PIA	2010-10-22	F	South	Genital	0	23	<30	4068
NgBox08/22	4099	349	6879	PIB	2010-10-20	F		Eye	0	0	<30	4605
NgBox08/23	4143	29	6940	PIB	2010-10-25	M	South	Anorectal	0	58	≥30	4006
NgBox08/25	14	33	21	PIB	2010-05-14	M	South	Genital	0	29	<30	4012
NgBox08/26	4101	1330	6876	PIA	2010-05-13	M	North	Genital	0	16	<30	4865
NgBox08/27	263	583	6881	PIB	2010-05-21	M	South	Other	0	21	<30	4500
NgBox08/28	4	4	225	PIB	2010-04-08	F	South	Genital	0	8	<30	4074
NgBox08/29	4	4	225	PIB	2010-12-09	M	South	Genital	0	29	<30	4034
NgBox08/30	847	29	1313	PIB	2010-12-05	M	South	Genital	0	16	<30	4017
NgBox08/31	4101	1330	6876	PIA	2010-12-07	F		Genital	0	20	<30	870
NgBox08/32	1808	29	2992	PIB	2010-12-07	M		Genital	0	51	≥30	4700
NgBox08/33	4101	1438	7671	PIA	2010-12-07	M	North	Genital	0	16	<30	4825
NgBox08/34	4149	1329	6949	PIB	2010-12-09	F	North	Genital	0	19	<30	4870
NgBox08/35	4338	33	7265	PIB	2010-12-08	M	South	Genital	0	28	<30	4022
NgBox08/36	1808	29	2992	PIB	2010-12-09	M	South	Genital	0	18	<30	4350
NgBox08/37	4	4	225	PIB	2010-12-09	M	South	Anorectal	0	27	<30	4000
NgBox08/38	263	26	384	PIB	2010-12-11	M	South	Eye	0	17	<30	4160
NgBox08/39	4101	1330	6876	PIA	2010-12-13	M	North	Genital	0	24	<30	4870
NgBox08/40	4608	349	7672	PIB	2010-12-15	M	South	Genital	0	32	≥30	4124
NgBox08/41	4101	1329	7209	PIA	2010-12-11	F	North	Genital	0	17	<30	4874
NgBox08/42	19	25	5268	PIB	2010-08-22	M	South	Anorectal	0	22	<30	4000
NgBox08/43	4101	1330	6876	PIA	2010-08-19	F	North	Genital	0	29	<30	4875
NgBox08/44	908	110	1407	PIB	2010-08-17	M	South	Anorectal	0	46	≥30	4011
NgBox08/45	4394	1439	7666	PIB	2010-08-24	F	South	Genital	0	17	<30	4127
NgBox08/46	4112	1284	7179	PIA	2010-08-17	F	North	Genital	0	17	<30	4818
NgBox08/47	4099	349	6879	PIB	2010-08-18	M		Genital	0	56	≥30	4700
NgBox08/48	4101	1330	6876	PIA	2010-08-12	F	North	Genital	0	15	<30	4875
NgBox08/49	4101	1330	6876	PIA	2010-08-15	F	North	Genital	0	22	<30	4873
NgBox08/50	4101	1334	6939	PIA	2010-08-17	F	North	Invasive	1	25	<30	4875
NgBox08/51	3361	29	5553	PIB	2010-08-19	M	South	Oropharangeal	0	24	<30	4215
NgBox08/52	4101	1330	6876	PIA	2010-08-19	M	North	Genital	0	22	<30	4870
NgBox08/53	4101	1330	6876	PIA	2010-08-23	F	North	Invasive	1	27	<30	4816
NgBox08/54	14	33	21	PIB	2010-08-20	M	South	Genital	0	27	<30	4000
NgBox08/55	904	349	1415	PIB	2010-08-22	M	South	Eye	0	28	<30	4211
NgBox08/56	227	26	190	PIB	2010-08-24	M	South	Genital	0	19	<30	4211
NgBox08/57	4609	334	7673	PIB	2010-08-18	F	North	Genital	0	29	<30	4810
NgBox08/58	4101	1334	6939	PIA	2010-08-18	F	North	Genital	0	27	<30	4875
NgBox08/59	4101	1330	6876	PIA	2010-08-26	F	North	Genital	0	26	<30	4870
NgBox08/60	4143	29	6940	PIB	2010-08-24	M	South	Genital	0	25	<30	4000
NgBox08/61	2777	29	7674	PIB	2010-08-25	M	South	Oropharangeal	0	23	<30	4000
NgBox08/62	4610	951	7675	PIA	2010-08-24	M		Genital	0	18	<30	O/S
NgBox08/63	1222	6	7676	PIA	2010-08-24	F	South	Genital	0	23	<30	4178
NgBox08/64	182	29	2018	PIB	2010-08-30	M		Genital	0	22	<30	810
NgBox08/65	908	110	1407	PIB	2010-08-30	M	South	Genital	0	34	≥30	4000
NgBox08/66	4101	1334	6939	PIA	2010-08-25	F	North	Genital	0	15	<30	4875
NgBox08/67	4104	1334	6886	PIA	2010-09-02	M	North	Genital	0	18	<30	4815
NgBox08/68	4101	1330	6876	PIA	2010-08-28	F	North	Genital	0	20	<30	4830
NgBox08/69	2280	1329	6863	PIB	2010-08-27	F	North	Genital	0	20	<30	4814
NgBox08/70	227	26	190	PIB	2010-08-31	M	South	Genital	0	21	<30	4215
NgBox08/71	4611	1178	7677	PIA	2010-09-01	M		Genital	0	54	≥30	3161
NgBox08/72	2280	1329	6863	PIB	2010-08-30	M	North	Genital	0	22	<30	4870
NgBox08/73	4292	35	7175	PIB	2010-09-03	F	South	Genital	0	19	<30	4010
NgBox08/74	2280	1329	6863	PIB	2010-09-02	M	North	Genital	0	19	<30	4870
NgBox08/75	4101	1330	6876	PIA	2010-08-30	M		Other	0	20	<30	4701
NgBox08/76	861	495	4232	PIB	2010-09-03	M		Genital	0	22	<30	O/S
NgBox08/77	4292	35	7175	PIB	2010-09-02	M	South	Genital	0	17	<30	4034
NgBox08/78	4302	1334	7190	PIA	2010-09-02	M	North	Genital	0	18	<30	4869
NgBox08/79	4112	1284	7179	PIA	2010-09-01	F	North	Genital	0	19	<30	4878
NgBox08/80	904	349	1415	PIB	2010-09-04	M	South	Genital	0	18	<30	4503
NgBox08/81	1808	29	2992	PIB	2010-09-02	M	South	Oropharangeal	0	40	≥30	4151
NgBox09/01	4101	1330	6876	PIA	2010-09-06	F	North	Genital	0	26	<30	4875
NgBox09/02	103	92	5037	PIA	2010-09-09	M	South	Genital	0	24	<30	4213
NgBox09/03	4101	1442	7678	PIA	2010-09-03	F	North	Genital	0	24	<30	4814
NgBox09/04	4146	1344	6943	PIB	2010-09-06	M	North	Other	0	19	<30	4810
NgBox09/05	217	137	2540	PIB	2010-09-11	M	North	Genital	0	40	≥30	4818
NgBox09/06	4099	349	6879	PIB	2010-09-08	M	South	Genital	0	24	<30	4132
NgBox09/07	4101	1330	6876	PIA	2010-09-06	F	North	Genital	0	25	<30	4880
NgBox09/08	4149	1329	6949	PIB	2010-09-09	M	South	Genital	0	37	≥30	4017
NgBox09/09	90	1210	6746	PIA	2010-09-02	M	South	Genital	0	42	≥30	4171
NgBox09/10	1840	29	3042	PIA	2010-09-06	M		Genital	0	26	<30	4730
NgBox09/11	543	899	4278	PIB	2010-09-07	M	North	Anorectal	0	40	≥30	4871
NgBox09/12	2811	1488	8064	PIB	2010-09-09	F	North	Genital	0	30	≥30	4825
NgBox09/13	4101	1330	6876	PIA	2010-09-07	M	North	Genital	0	17	<30	4870
NgBox09/14	463	27	697	PIB	2010-09-07	F	South	Genital	0	19	<30	4000
NgBox09/15	1840	29	3042	PIA	2010-09-07	F		Genital	0	18	<30	4730
NgBox09/16	1284	135	2035	PIB	2010-09-09	M	South	Genital	0	31	≥30	4000
NgBox09/17	4101	1330	6876	PIA	2010-09-10	F	North	Genital	0	22	<30	4872
NgBox09/18	4101	1330	6876	PIA	2010-09-07	M	North	Genital	0	20	<30	4816
NgBox09/19	96	1178	8065	PIA	2010-09-10	M	South	Genital	0	38	≥30	4013
NgBox09/20	227	26	190	PIB	2010-09-12	F	South	Genital	0	18	<30	4560
NgBox09/21	4533	1329	8066	PIB	2010-09-10	F	North	Genital	0	17	<30	4818
NgBox09/22	262	1332	6880	PIB	2010-09-13	M	South	Genital	0	21	<30	4000
NgBox09/23	4104	1329	6937	PIA	2010-09-13	M	South	Genital	0	21	<30	4000
NgBox09/24	4143	29	6940	PIB	2010-09-10	M	South	Genital	0	27	<30	4103
NgBox09/25	4104	1329	6937	PIA	2010-09-17	M	North	Genital	0	15	<30	4870
NgBox09/26	1222	1478	8067	PIA	2010-09-13	M	South	Genital	0	20	<30	4510
NgBox09/27	96	1488	8068	PIA	2010-09-17	M	South	Genital	0	44	≥30	4215
NgBox09/28	4143	29	6940	PIB	2010-09-13	M	South	Anorectal	0	30	≥30	4128
NgBox09/29	4104	1329	6937	PIA	2010-09-12	F	North	Genital	0	24	<30	4868
NgBox09/30	4104	1334	6886	PIA	2010-09-14	M	North	Genital	0	34	≥30	4874
NgBox09/31	4338	33	7265	PIB	2010-09-16	F	South	Genital	0	30	≥30	4305
NgBox09/32	4143	29	6940	PIB	2010-09-18	M	South	Genital	0	29	<30	4133
NgBox09/33	4143	29	6940	PIB	2010-09-18	M	South	Genital	0	36	≥30	4078
NgBox09/34	4101	1330	6876	PIA	2010-09-14	F	North	Genital	0	21	<30	4875
NgBox09/35	4143	29	6940	PIB	2010-09-16	M	South	Oropharangeal	0	31	≥30	4000
NgBox09/36	1840	29	3042	PIA	2010-09-20	F	North	Genital	0	15	<30	4818
NgBox09/37	14	33	21	PIB	2010-09-21	M	South	Genital	0	40	≥30	4074
NgBox09/38	14	33	21	PIB	2010-09-23	M	South	Anorectal	0	25	<30	4005
NgBox09/39	908	110	1407	PIB	2010-09-22	M	South	Genital	0	41	≥30	4170
NgBox09/42	4	4	225	PIB	2010-10-28	M	South	Anorectal	0	31	≥30	4011
NgBox09/43	14	4	437	PIB	2010-10-25	M	South	Genital	0	30	≥30	4000
NgBox09/44	95	879	8069	PIB	2010-10-27	M	South	Genital	0	56	≥30	4103
NgBox09/45	904	349	1415	PIB	2010-10-27	M	South	Genital	0	20	<30	4034
NgBox09/46	908	110	1407	PIB	2010-10-25	M	North	Oropharangeal	0	39	≥30	4870
NgBox09/47	4101	1330	6876	PIA	2010-11-02	F	North	Genital	0	17	<30	4880
NgBox09/48	1403	1489	8070	PIA	2010-11-02	F	South	Genital	0	49	≥30	4503
NgBox09/49	543	899	4278	PIB	2010-10-26	M	South	Genital	0	63	≥30	4567
NgBox09/50	4112	1284	7179	PIA	2010-10-28	F	North	Genital	0	30	≥30	4870
NgBox09/51	463	27	697	PIB	2010-10-27	F	South	Eye	0	0	<30	4110
NgBox09/52	4143	29	6940	PIB	2010-10-27	M	South	Genital	0	43	≥30	4053
NgBox09/53	904	349	1415	PIB	2010-10-23	M	South	Genital	0	17	<30	4213
NgBox09/54	4143	29	6940	PIB	2010-10-25	M	South	Genital	0	27	<30	4169
NgBox09/55	301	29	359	PIB	2010-10-28	M	North	Anorectal	0	43	≥30	4870
NgBox09/56	1840	29	3042	PIA	2010-10-25	M	North	Genital	0	25	<30	4871
NgBox09/57	301	29	359	PIB	2010-10-26	M	North	Genital	0	18	<30	4810
NgBox09/59	4101	1330	6876	PIA	2010-10-30	M	North	Genital	0	25	<30	4815
NgBox09/60	262	1332	6880	PIB	2010-10-29	M	South	Genital	0	23	<30	4000
NgBox09/61	2280	1329	6863	PIB	2010-10-25	F	North	Genital	0	23	<30	4876
NgBox09/62	182	29	2018	PIB	2010-10-29	F	South	Genital	0	22	<30	4220
NgBox09/63	4143	29	6940	PIB	2010-11-01	M	South	Genital	0	49	≥30	4106
NgBox09/64	2280	1329	6863	PIB	2010-11-02	M	North	Genital	0	30	≥30	4870
NgBox09/65	2280	1329	6863	PIB	2010-10-27	F	North	Genital	0	18	<30	4875
NgBox09/66	4101	1330	6876	PIA	2010-11-01	F	North	Other	0	16	<30	4871
NgBox09/67	904	349	1415	PIB	2010-11-04	M	North	Eye	0	0	<30	4815
NgBox09/68	263	26	384	PIB	2010-11-02	M	South	Genital	0	18	<30	4305
NgBox09/69	4101	1330	6876	PIA	2010-11-01	M	North	Genital	0	18	<30	4850
NgBox09/70	262	1332	6880	PIB	2010-11-02	M	South	Genital	0	27	<30	4000
NgBox09/71	4808	26	8071	PIB	2010-11-04	M	South	Genital	0	22	<30	4000
NgBox09/72	1808	29	2992	PIB	2010-11-05	M		Genital	0	37	≥30	4700
NgBox09/73	4099	349	6879	PIB	2010-11-05	M		Other	0	18	<30	4701
NgBox09/74	4146	1344	6943	PIB	2010-11-15	M	North	Genital	0	23	<30	4810
NgBox09/75	904	349	1415	PIB	2010-11-17	M	North	Genital	0	40	≥30	4812
NgBox09/76	785	98	4849	PIB	2010-11-11	F	North	Genital	0	62	≥30	4870
NgBox09/77	1840	29	3042	PIA	2010-11-19	F	South	Genital	0	24	<30	4215
NgBox09/78	4146	1344	6943	PIB	2010-11-17	F	North	Genital	0	24	<30	4871
NgBox09/79	4	4	225	PIB	2010-11-16	M	North	Oropharangeal	0	21	<30	4870
NgBox09/80	4809	334	8072	PIB	2010-11-16	M	South	Genital	0	49	≥30	4000
NgBox10/01	2280	1329	6863	PIB	2010-11-17	F	North	Genital	0	24	<30	4895
NgBox10/02	785	60	3611	PIB	2010-11-16	M	South	Genital	0	30	≥30	4503
NgBox10/03	4101	1330	6876	PIA	2010-11-16	M	North	Genital	0	17	<30	4810
NgBox10/04	1445	137	2322	PIB	2010-11-10	M	North	Genital	0	21	<30	4870
NgBox10/05	4101	1330	6876	PIA	2010-11-12	M	North	Genital	0	15	<30	4816
NgBox10/06	908	110	1407	PIB	2010-11-11	M	South	Anorectal	0	19	<30	4215
NgBox10/07	4626	197	7699	PIB	2010-11-15	M	North	Genital	0	55	≥30	4879
NgBox10/08	4401	33	7354	PIB	2010-11-17	F	South	Genital	0	44	≥30	4115
NgBox10/09	4627	372	7700	PIA	2010-11-22	M	South	Genital	0	61	≥30	4120
NgBox10/10	4143	29	6940	PIB	2010-11-18	M	South	Genital	0	18	<30	4051
NgBox10/11	4101	1330	6876	PIA	2010-11-06	F	North	Invasive	1	37	≥30	4870
NgBox10/12	847	29	1313	PIB	2010-11-22	M	South	Genital	0	20	<30	4066
NgBox10/14	14	33	21	PIB	2010-11-19	M	South	Genital	0	34	≥30	4055
NgBox10/15	4124	372	6926	PIB	2010-11-18	M	South	Genital	0	30	≥30	4000
NgBox10/16	4143	29	6940	PIB	2010-11-17	M	South	Genital	0	51	≥30	4573
NgBox10/17	4101	1330	6876	PIA	2010-11-09	F	North	Genital	0	18	<30	4870
NgBox10/18	4401	33	7354	PIB	2010-11-13	F	South	Genital	0	2	<30	4306
NgBox10/20	14	4	437	PIB	2010-11-11	M	South	Anorectal	0	44	≥30	4011
NgBox10/21	4101	1330	6876	PIA	2010-11-15	F	North	Genital	0	23	<30	4876
NgBox10/22	4104	1334	6886	PIA	2010-11-17	F	North	Genital	0	22	<30	4816
NgBox10/23	904	349	1415	PIB	2010-11-18	F	North	Genital	0	34	≥30	4814
NgBox10/24	4143	29	6940	PIB	2010-11-15	F	South	Genital	0	33	≥30	4075
NgBox10/25	50	29	64	PIB	2010-11-22	M	South	Genital	0	23	<30	4067
NgBox10/26	4101	1330	6876	PIA	2010-11-06	M	North	Genital	0	31	≥30	4870
NgBox10/27	4101	1334	6939	PIA	2010-11-02	F	North	Genital	0	15	<30	4875
NgBox10/29	4101	1330	6876	PIA	2010-11-08	M	North	Genital	0	18	<30	4870
NgBox10/31	4101	1330	6876	PIA	2010-11-06	F	North	Invasive	1	17	<30	4870
NgBox10/32	543	899	4278	PIB	2010-11-15	F	South	Genital	0	24	<30	4214
NgBox10/33	4149	1329	6949	PIB	2010-11-08	M	North	Genital	0	19	<30	4870
NgBox10/34	4313	29	7213	PIA	2010-11-13	M	North	Genital	0	17	<30	4865
NgBox10/35	4101	1330	6876	PIA	2010-11-08	M		Genital	0	17	<30	4713
NgBox10/36	262	1332	6880	PIB	2010-11-08	M	South	Genital	0	21	<30	4374
NgBox10/37	904	349	1415	PIB	2010-11-10	F	North	Genital	0	27	<30	4812
NgBox10/38	1840	29	3042	PIA	2010-11-05	M	South	Genital	0	24	<30	4214
NgBox10/39	1222	356	7702	PIA	2010-11-21	M		Invasive	1	44	≥30	O/S
NgBox10/40	1808	29	2992	PIB	2010-11-23	M	South	Genital	0	18	<30	4000
NgBox10/41	4101	1330	6876	PIA	2010-11-24	M	North	Genital	0	19	<30	4870
NgBox10/42	4672	1331	8179	PIB	2010-11-27	M	South	Genital	0	38	≥30	4031
NgBox10/43	262	29	4444	PIB	2010-11-23	M	South	Genital	0	27	<30	4000
NgBox10/44	2280	1329	6863	PIB	2010-11-19	M	North	Genital	0	24	<30	4876
NgBox10/45	4101	1330	6876	PIA	2010-11-22	M	North	Genital	0	47	≥30	4816
NgBox10/46	4401	33	7354	PIB	2010-11-24	F	South	Genital	0	21	<30	4127
NgBox10/49	14	33	21	PIB	2010-11-25	M	South	Genital	0	20	<30	4101
NgBox10/50	124	1447	7703	PIB	2010-11-25	M	North	Genital	0	24	<30	4869
NgBox10/51	14	33	21	PIB	2010-11-26	M	South	Oropharangeal	0	26	<30	4064
NgBox10/53	1445	137	2322	PIB	2010-11-23	M	North	Genital	0	23	<30	4810
NgBox10/54	4099	349	6879	PIB	2010-11-25	M	North	Genital	0	17	<30	4816
NgBox10/55	908	110	1407	PIB	2010-11-29	F	South	Genital	0	31	≥30	4120
NgBox10/56	103	1448	7704	PIA	2010-11-30	M	South	Genital	0	39	≥30	4129
NgBox10/57	2011	29	3314	PIB	2010-11-29	M	South	Oropharangeal	0	21	<30	4000
NgBox10/58	847	29	1313	PIB	2010-11-29	M	South	Anorectal	0	21	<30	4000
NgBox10/59	50	29	64	PIB	2010-12-06	M	South	Other	0	24	<30	4054
NgBox10/60	4101	1442	7678	PIA	2010-12-04	F		Genital	0	19	<30	4740
NgBox10/61	4101	1330	6876	PIA	2010-11-29	M	North	Genital	0	19	<30	4825
NgBox10/62	4101	349	7705	PIA	2010-11-30	F	North	Invasive	1	19	<30	4870
NgBox10/63	1808	29	2992	PIB	2010-12-01	M	South	Anorectal	0	61	≥30	4218
NgBox10/64	1808	29	2992	PIB	2010-12-02	M	South	Anorectal	0	19	<30	4000
NgBox10/65	1808	29	2992	PIB	2010-12-03	M	South	Genital	0	22	<30	4000
NgBox10/66	103	1444	7680	PIA	2010-12-03	F	South	Genital	0	23	<30	4214
NgBox10/67	161	1562	8573	PIA	2010-12-04	M	South	Genital	0	57	≥30	4564
NgBox10/68	4143	29	6940	PIB	2010-12-04	M	South	Anorectal	0	30	≥30	4124
NgBox10/69	4101	1329	7209	PIA	2010-12-02	M	North	Genital	0	24	<30	4870
NgBox10/70	4536	1449	7706	PIB	2010-12-07	M		Genital	0	56	≥30	4700
NgBox10/71	4101	1330	6876	PIA	2010-12-15	F	North	Genital	0	19	<30	4868
NgBox10/72	3141	444	5183	PIB	2010-12-13	F	South	Genital	0	21	<30	4207
NgBox10/73	4536	29	7707	PIB	2010-12-13	M		Genital	0	22	<30	4740
NgBox10/74	4631	1450	7708	PIB	2010-12-14	M	North	Genital	0	24	<30	4870
NgBox10/75	4101	1330	6876	PIA	2010-12-15	M	North	Other	0	41	≥30	4873
NgBox10/76	697	835	7709	PIA	2010-12-17	M	South	Genital	0	34	≥30	4000
NgBox10/77	4632	4	7710	PIB	2010-12-16	F	South	Genital	0	23	<30	4011
NgBox10/78	103	1444	7680	PIA	2010-12-20	M	South	Genital	0	38	≥30	4211
NgBox10/79	4536	197	7660	PIB	2010-12-14	F	North	Genital	0	14	<30	4825
NgBox10/80	4143	29	6940	PIB	2010-12-21	M	South	Genital	0	27	<30	4000
NgBox10/81	4633	1332	7711	PIB	2010-12-20	M	South	Anorectal	0	20	<30	4000
NgBox11/01	4143	29	6940	PIB	2010-12-21	M	South	Genital	0	51	≥30	4551
NgBox11/02	4	4	225	PIB	2010-12-23	M	South	Genital	0	19	<30	4006
NgBox11/03	4572	33	7607	PIB	2010-12-23	M	South	Oropharangeal	0	27	<30	4005
NgBox11/04	1808	29	2992	PIB	2010-12-24	M	South	Genital	0	31	≥30	4285
NgBox11/05	4634	1440	7712	PIB	2010-12-20	M	North	Genital	0	24	<30	4875
NgBox11/09	1840	29	3042	PIA	2010-12-20	F	North	Genital	0	27	<30	4825
NgBox11/10	262	1332	6880	PIB	2010-12-21	M	South	Genital	0	21	<30	4000
NgBox11/11	4101	1330	6876	PIA	2010-12-29	M	North	Genital	0	29	<30	4870
NgBox11/12	262	1332	6880	PIB	2010-12-29	M	South	Genital	0	32	≥30	4223
NgBox11/13	90	21	436	PIA	2010-12-30	F		Genital	0	23	<30	2450
NgBox11/14	4101	1330	6876	PIA	2010-12-28	M	North	Genital	0	28	<30	4875
NgBox11/15	1808	29	2992	PIB	2010-12-31	M	North	Genital	0	29	<30	4870
NgBox11/16	407	1334	7713	PIA	2011-01-01	M	South	Invasive	1	71	≥30	4060
NgBox11/17	4112	27	6896	PIA	2011-01-04	M	South	Genital	0	42	≥30	4019
NgBox11/18	1601	4	3056	PIB	2011-01-07	M	South	Genital	0	33	≥30	4152
NgBox11/19	543	110	1405	PIB	2011-01-04	M	South	Genital	0	45	≥30	4227
NgBox11/20	4101	1330	6876	PIA	2010-12-25	F	North	Genital	0	19	<30	4825
NgBox11/23	53	21	147	PIB	2011-01-08	F		Genital	0	65	≥30	4655
NgBox11/24	543	899	4278	PIB	2011-01-06	M	South	Genital	0	53	≥30	4000
NgBox11/25	4101	1330	6876	PIA	2011-07-25	F	North	Other	0	14	<30	4816
NgBox11/26	4104	1334	6886	PIA	2012-01-25	M	North	Genital	0	27	<30	4870
NgBox11/27	407	1447	8073	PIA	2012-03-30	M	North	Genital	0	20	<30	4810
NgBox11/28	4810	21	8074	PIB	2012-04-07	M		Genital	0	18	<30	2166
NgBox11/29	4143	29	6940	PIB	2012-04-09	M	South	Genital	0	28	<30	4154
NgBox11/30	4401	33	7354	PIB	2010-12-11	F	South	Genital	0	30	≥30	4304
NgBox11/31	4	4	225	PIB	2010-12-17	M	South	Anorectal	0	30	≥30	4005
NgBox11/32	2280	1329	6863	PIB	2010-01-22	M		Genital	0	37	≥30	4740
NgBox11/33	2280	1329	6863	PIB	2010-02-11	M	North	Genital	0	20	<30	4870
NgBox11/35	4301	1178	7189	PIA	2010-02-19	M	North	Genital	0	18	<30	4870
NgBox11/36	543	899	4278	PIB	2010-02-19	F	South	Genital	0	30	≥30	4000
NgBox11/37	4112	27	6896	PIA	2010-02-22	F	South	Genital	0	17	<30	4109
NgBox11/38	4112	27	6896	PIA	2010-02-23	M	South	Genital	0	29	<30	4217
NgBox11/40	262	1332	6880	PIB	2010-03-09	M	North	Genital	0	24	<30	4810
NgBox11/41	4101	1330	6876	PIA	2010-03-08	M	North	Genital	0	17	<30	4871
NgBox11/42	1808	29	2992	PIB	2010-03-11	M	South	Anorectal	0	23	<30	4215
NgBox11/43	4792	1483	8037	PIA	2010-03-23	M	South	Genital	0	27	<30	4350
NgBox11/44	4101	1330	6876	PIA	2010-03-10	F	North	Genital	0	18	<30	4875
NgBox11/46	1840	29	3042	PIA	2010-03-18	M	North	Genital	0	16	<30	4825
NgBox11/47	3059	29	5049	PIB	2010-03-25	M	South	Genital	0	26	<30	4300
NgBox11/48	4401	33	7354	PIB	2010-05-11	M	South	Genital	0	31	≥30	4215
NgBox11/50	61	27	356	PIB	2010-09-15	F	South	Genital	0	23	<30	4560
NgBox11/51	4	4	225	PIB	2010-09-30	M	South	Anorectal	0	40	≥30	4152
NgBox11/52	4099	349	6879	PIB	2010-10-23	M		Genital	0	17	<30	4605
NgBox14/01	4101	1330	6876	PIA	2011-04-15	F	North	Genital	0	15	<30	4814
NgBox14/02	14	33	21	PIB	2011-04-13	M	South	Other	0	29	<30	4565
NgBox14/03	4294	6	7178	PIB	2011-04-13	F	South	Genital	0	34	≥30	4051
NgBox14/04	908	110	1407	PIB	2011-04-12	M	South	Genital	0	49	≥30	4215
NgBox14/05	4099	349	6879	PIB	2011-04-11	M		Genital	0	18	<30	4700
NgBox14/06	543	899	4278	PIB	2011-04-12	M	South	Anorectal	0	30	≥30	4006
NgBox14/09	4104	1329	6937	PIA	2011-04-13	F	North	Genital	0	17	<30	4870
NgBox14/10	1808	29	2992	PIB	2011-04-12	M	South	Anorectal	0	29	<30	4000
NgBox14/11	4101	1330	6876	PIA	2011-04-06	F	North	Genital	0	38	≥30	4816
NgBox14/12	4274	1329	7137	PIB	2011-04-10	M	North	Genital	0	21	<30	4870
NgBox14/13	4	4	225	PIB	2011-04-14	M	South	Genital	0	39	≥30	4504
NgBox14/14	123	92	2110	PIA	2011-05-06	M	South	Genital	0	20	<30	4564
NgBox14/15	4101	1330	6876	PIA	2011-04-13	F	North	Genital	0	17	<30	4895
NgBox14/16	4101	1334	6939	PIA	2011-04-13	F	North	Genital	0	20	<30	4825
NgBox14/17	124	1447	7703	PIB	2011-04-14	F		Genital	0	24	<30	O/S
NgBox14/18	147	197	1214	PIA	2011-04-18	M	South	Genital	0	26	<30	4405
NgBox14/19	4099	349	6879	PIB	2011-04-19	M	South	Genital	0	17	<30	4280
NgBox14/20	4338	33	7265	PIB	2011-04-14	F		Genital	0	19	<30	4614
NgBox14/21	847	29	1313	PIB	2011-04-19	M	South	Oropharangeal	0	29	<30	4215
NgBox14/22	4112	835	8038	PIA	2011-04-20	M	South	Genital	0	59	≥30	4213
NgBox14/23	4292	35	7175	PIB	2011-04-21	M	South	Genital	0	26	<30	4114
NgBox14/24	4101	1330	6876	PIA	2011-04-18	F	North	Genital	0	24	<30	4869
NgBox14/25	4104	1329	6937	PIA	2011-04-18	F	North	Genital	0	18	<30	4870
NgBox14/26	4101	1330	6876	PIA	2011-04-28	F	North	Other	0	17	<30	4871
NgBox14/27	4101	1330	6876	PIA	2011-04-21	M	North	Genital	0	24	<30	4810
NgBox14/28	14	33	21	PIB	2011-04-21	M	South	Oropharangeal	0	26	<30	4215
NgBox14/31	904	349	1415	PIB	2011-04-17	F	North	Genital	0	17	<30	4811
NgBox14/32	904	349	1415	PIB	2011-04-21	M	North	Genital	0	17	<30	4811
NgBox14/33	8	5	12	PIB	2011-04-21	M	North	Genital	0	26	<30	4815
NgBox14/34	4099	349	6879	PIB	2011-04-15	M	North	Genital	0	16	<30	4810
NgBox14/35	4101	1410	7410	PIA	2011-04-22	F	North	Genital	0	21	<30	4825
NgBox14/36	4310	4	7205	PIB	2011-04-23	M	South	Oropharangeal	0	25	<30	4006
NgBox14/37	301	29	359	PIB	2011-04-20	M	South	Genital	0	38	≥30	4005
NgBox14/38	4793	1161	8039	PIB	2011-04-21	M		Genital	0	25	<30	4742
NgBox14/39	4101	1330	6876	PIA	2011-04-23	M	North	Genital	0	17	<30	4811
NgBox14/40	4	28	6882	PIB	2011-04-27	M	South	Genital	0	25	<30	4000
NgBox14/41	908	110	1407	PIB	2011-04-28	M	South	Genital	0	18	<30	4034
NgBox14/42	4099	349	6879	PIB	2011-04-27	M	South	Other	0	17	<30	4300
NgBox14/45	4101	1330	6876	PIA	2011-04-28	M	North	Genital	0	56	≥30	4870
NgBox14/46	4101	1330	6876	PIA	2011-04-28	M	North	Genital	0	22	<30	4890
NgBox14/47	14	33	21	PIB	2011-04-28	M	South	Oropharangeal	0	27	<30	4064
NgBox14/48	4146	1344	6943	PIB	2011-04-28	F	North	Genital	0	21	<30	4870
NgBox14/49	4101	1330	6876	PIA	2011-04-25	F	North	Genital	0	17	<30	4812
NgBox14/50	1840	29	3042	PIA	2011-04-28	F	North	Genital	0	16	<30	4825
NgBox14/51	4143	29	6940	PIB	2011-04-29	M	South	Anorectal	0	40	≥30	4110
NgBox14/52	4101	1442	7678	PIA	2011-05-03	F	South	Genital	0	21	<30	4509
NgBox14/53	4101	1330	6876	PIA	2011-04-30	M	North	Genital	0	29	<30	4870
NgBox14/55	4101	1330	6876	PIA	2011-04-29	M	North	Genital	0	32	≥30	4870
NgBox14/56	4099	1406	7659	PIB	2011-05-04	M	North	Genital	0	48	≥30	4810
NgBox14/57	4104	1329	6937	PIA	2011-05-03	M	North	Eye	0	0	<30	4880
NgBox14/58	4287	29	7164	PIB	2011-05-04	M	South	Genital	0	20	<30	4101
NgBox14/59	4310	4	7205	PIB	2011-05-04	M	South	Genital	0	53	≥30	4005
NgBox14/60	4101	1410	7410	PIA	2011-05-04	M		Genital	0	29	<30	4715
NgBox14/61	301	29	359	PIB	2011-05-05	M	North	Genital	0	51	≥30	4810
NgBox14/62	4101	1330	6876	PIA	2011-05-08	F	North	Genital	0	18	<30	4815
NgBox14/63	19	25	5268	PIB	2011-05-10	M	South	Genital	0	33	≥30	4169
NgBox14/64	1808	29	2992	PIB	2011-05-10	F	South	Genital	0	28	<30	4118
NgBox14/65	161	349	7803	PIA	2011-05-12	M	South	Genital	0	26	<30	4303
NgBox14/66	4101	1334	6939	PIA	2011-05-11	M	North	Genital	0	23	<30	4870
NgBox14/67	4104	1329	6937	PIA	2011-05-12	M	North	Other	0	16	<30	4870
NgBox14/68	1808	29	2992	PIB	2011-05-13	M	South	Anorectal	0	39	≥30	4350
NgBox14/69	847	29	1313	PIB	2011-05-09	M	South	Genital	0	27	<30	4207
NgBox14/70	4794	136	8040	PIB	2011-05-13	M	South	Genital	0	45	≥30	4000
NgBox14/71	14	33	21	PIB	2011-05-13	M		Genital	0	19	<30	4754
NgBox14/72	4112	1284	7179	PIA	2011-05-12	F	North	Genital	0	16	<30	4870
NgBox14/73	4101	1330	6876	PIA	2011-05-10	F	North	Genital	0	22	<30	4876
NgBox14/74	4101	1330	6876	PIA	2011-05-13	M		Genital	0	21	<30	4605
NgBox14/75	4099	349	6879	PIB	2011-05-16	M	South	Genital	0	22	<30	4304
NgBox14/76	4	4	225	PIB	2011-05-16	M	South	Anorectal	0	29	<30	4030
NgBox14/77	4	28	6882	PIB	2011-05-17	M	South	Genital	0	31	≥30	4220
NgBox14/78	4310	4	7205	PIB	2011-05-18	M	South	Genital	0	30	≥30	4209
NgBox14/79	4	28	6882	PIB	2011-05-18	M	South	Genital	0	23	<30	4114
NgBox14/80	4143	29	6940	PIB	2011-05-18	M	South	Genital	0	46	≥30	4000
NgBox14/81	4101	1330	6876	PIA	2011-05-16	F	North	Genital	0	20	<30	4883
NgBox15/01	2280	1329	6863	PIB	2011-05-16	M	North	Genital	0	20	<30	4870
NgBox15/02	4310	4	7205	PIB	2011-05-17	M	South	Anorectal	0	55	≥30	4005
NgBox15/03	4101	1330	6876	PIA	2011-05-13	F	North	Other	0	18	<30	4814
NgBox15/04	1808	29	2992	PIB	2011-05-16	M	North	Genital	0	57	≥30	4810
NgBox15/05	4101	1330	6876	PIA	2011-05-21	F	South	Genital	0	21	<30	4303
NgBox15/06	4310	4	7205	PIB	2011-05-17	M	South	Genital	0	43	≥30	4030
NgBox15/07	1840	29	3042	PIA	2011-05-19	F	South	Genital	0	22	<30	4506
NgBox15/08	904	349	1415	PIB	2011-05-18	M	North	Genital	0	15	<30	4810
NgBox15/09	4394	1439	7666	PIB	2011-05-21	F	North	Genital	0	19	<30	4812
NgBox15/10	301	29	359	PIB	2011-05-26	M	South	Genital	0	28	<30	4073
NgBox15/11	4101	1330	6876	PIA	2011-05-07	M	North	Genital	0	20	<30	4815
NgBox15/12	4769	349	7997	PIB	2011-05-24	F	South	Anorectal	0	35	≥30	4000
NgBox15/13	4394	1439	7666	PIB	2011-05-25	F	North	Genital	0	27	<30	4816
NgBox15/14	4101	1330	6876	PIA	2011-05-26	F	North	Genital	0	20	<30	4818
NgBox15/15	4112	1284	7179	PIA	2011-05-25	F	North	Genital	0	17	<30	4871
NgBox15/19	263	26	384	PIB	2011-06-02	F	South	Genital	0	19	<30	4500
NgBox15/20	5082	137	8568	PIB	2011-05-31	M	South	Genital	0	67	≥30	4066
NgBox15/21	161	1479	8569	PIA	2011-05-27	F	South	Genital	0	17	<30	4132
NgBox15/22	4101	1330	6876	PIA	2011-05-30	M	North	Genital	0	24	<30	4883
NgBox15/23	4101	1330	6876	PIA	2011-06-01	F	North	Genital	0	22	<30	4870
NgBox15/24	4101	1330	6876	PIA	2011-06-01	M	North	Genital	0	29	<30	4870
NgBox15/25	4101	1330	6876	PIA	2011-06-01	F	North	Genital	0	34	≥30	4870
NgBox15/26	4101	1330	6876	PIA	2011-06-02	M	North	Genital	0	40	≥30	4816
NgBox15/27	1808	29	2992	PIB	2011-05-30	M	South	Genital	0	45	≥30	4560
NgBox15/28	908	110	1407	PIB	2011-06-01	M	South	Genital	0	42	≥30	4350
NgBox15/29	4401	33	7354	PIB	2011-05-31	F	South	Genital	0	20	<30	4129
NgBox15/30	908	110	1407	PIB	2011-05-30	M	South	Genital	0	26	<30	4006
NgBox15/31	4633	1332	7711	PIB	2011-05-31	M	South	Genital	0	29	<30	4113
NgBox15/32	3129	6	5170	PIB	2011-05-17	M	South	Genital	0	17	<30	4020
NgBox15/33	4101	1334	6939	PIA	2011-06-02	F	North	Genital	0	20	<30	4871
NgBox15/34	4770	29	7998	PIB	2011-06-01	M	South	Genital	0	25	<30	4169
NgBox15/36	4771	1330	7999	PIA	2011-06-02	F	North	Genital	0	17	<30	4817
NgBox15/37	4099	1406	7659	PIB	2011-05-30	M	North	Genital	0	28	<30	4816
NgBox15/39	908	110	1407	PIB	2011-06-03	M	South	Genital	0	22	<30	4000
NgBox15/40	28	29	995	PIB	2011-06-04	M	South	Genital	0	27	<30	4210
NgBox15/41	3129	6	5170	PIB	2011-06-10	M	South	Genital	0	19	<30	4032
NgBox15/42	1291	96	8000	PIB	2011-06-03	F	South	Genital	0	26	<30	4551
NgBox15/43	4310	4	7205	PIB	2011-06-02	M	South	Oropharangeal	0	25	<30	4000
NgBox15/44	3129	6	5170	PIB	2011-06-02	F	South	Genital	0	18	<30	4020
NgBox15/45	1808	29	2992	PIB	2011-06-04	F	South	Genital	0	25	<30	4127
NgBox15/46	1403	92	8001	PIA	2011-06-07	M	South	Genital	0	25	<30	4122
NgBox15/47	4099	349	6879	PIB	2011-06-07	M		Genital	0	21	<30	4700
NgBox15/48	90	330	1686	PIA	2011-06-10	M		Genital	0	51	≥30	3220
NgBox15/49	4772	29	8574	PIA	2011-06-11	M	South	Oropharangeal	0	19	<30	4068
NgBox15/50	1808	29	2992	PIB	2011-06-01	M	South	Genital	0	18	<30	4560
NgBox15/51	4101	1330	6876	PIA	2011-06-06	M	North	Genital	0	19	<30	4816
NgBox15/52	4099	349	6879	PIB	2011-06-10	M	North	Genital	0	14	<30	4816
NgBox15/53	124	1274	6318	PIB	2011-06-18	M	North	Genital	0	50	≥30	4870
NgBox15/54	4773	334	8575	PIB	2011-06-18	M	South	Genital	0	25	<30	4132
NgBox15/55	543	899	4278	PIB	2011-06-12	M	South	Genital	0	24	<30	4213
NgBox15/56	4774	21	8002	PIA	2011-06-14	M	South	Genital	0	44	≥30	4215
NgBox15/57	14	33	21	PIB	2011-06-16	M	South	Genital	0	43	≥30	4006
NgBox15/58	263	26	384	PIB	2011-06-15	F	South	Genital	0	22	<30	4122
NgBox15/59	1808	29	2992	PIB	2011-06-13	M	South	Genital	0	44	≥30	4306
NgBox15/60	4	28	6882	PIB	2011-06-14	M	South	Oropharangeal	0	26	<30	4101
NgBox15/61	4	4	225	PIB	2011-06-14	M	South	Genital	0	21	<30	4000
NgBox15/62	1808	29	2992	PIB	2011-06-15	M	South	Anorectal	0	23	<30	4000
NgBox15/63	1808	29	2992	PIB	2011-06-14	M	South	Genital	0	45	≥30	4006
NgBox15/64	4310	4	7205	PIB	2011-06-17	M	South	Anorectal	0	31	≥30	4509
NgBox15/65	4774	21	8002	PIA	2011-06-15	F	South	Oropharangeal	0	42	≥30	4215
NgBox15/66	4	28	6882	PIB	2011-06-15	F	South	Genital	0	28	<30	4132
NgBox15/67	1808	29	2992	PIB	2011-06-20	M	South	Genital	0	53	≥30	4018
NgBox15/68	262	1332	6880	PIB	2011-06-20	M	South	Anorectal	0	19	<30	4065
NgBox15/69	4310	4	7205	PIB	2011-06-20	M	South	Genital	0	20	<30	4064
NgBox15/70	263	26	384	PIB	2011-06-20	M	North	Genital	0	20	<30	4870
NgBox15/71	1808	29	2992	PIB	2011-06-23	M	North	Genital	0	52	≥30	4870
NgBox15/72	4104	1329	6937	PIA	2011-06-22	M	South	Genital	0	28	<30	4207
NgBox15/73	4101	1330	6876	PIA	2011-06-16	F	North	Genital	0	17	<30	4875
NgBox15/74	4	28	6882	PIB	2011-06-23	M	South	Other	0	21	<30	4006
NgBox15/75	4633	1332	7711	PIB	2011-06-24	M	South	Genital	0	35	≥30	4120
NgBox15/76	4146	1344	6943	PIB	2011-06-24	M	North	Genital	0	37	≥30	4868
NgBox15/77	997	137	1582	PIB	2011-06-22	F	South	Genital	0	18	<30	4067
NgBox15/78	1808	29	2992	PIB	2011-06-25	M	South	Oropharangeal	0	42	≥30	4152
NgBox15/79	14	33	21	PIB	2011-06-27	M	North	Genital	0	20	<30	4825
NgBox15/80	1808	29	2992	PIB	2011-06-28	M	South	Genital	0	38	≥30	4000
NgBox15/81	103	21	772	PIA	2011-06-29	M		Genital	0	21	<30	O/S
NgBox16/01	4101	1330	6876	PIA	2011-06-28	F		Genital	0	20	<30	4700
NgBox16/02	4104	1329	6937	PIA	2011-06-29	F	North	Genital	0	19	<30	4814
NgBox16/03	4099	1406	7659	PIB	2011-06-27	M	North	Genital	0	28	<30	4810
NgBox16/04	2893	29	4786	PIB	2011-07-01	M	South	Genital	0	22	<30	4000
NgBox16/05	4101	1330	6876	PIA	2011-06-28	M	North	Genital	0	16	<30	4816
NgBox16/06	4101	1284	7336	PIA	2011-06-30	F	North	Genital	0	17	<30	4870
NgBox16/08	847	29	1313	PIB	2011-07-04	M	South	Genital	0	34	≥30	4225
NgBox16/09	4656	1334	8003	PIB	2011-07-04	M	South	Genital	0	38	≥30	4558
NgBox16/10	4104	1329	6937	PIA	2011-07-06	M	North	Genital	0	20	<30	4865
NgBox16/11	4101	1330	6876	PIA	2011-07-01	F	North	Genital	0	26	<30	4875
NgBox16/12	4101	1480	8004	PIA	2011-07-04	F	North	Genital	0	19	<30	4875
NgBox16/13	4101	1382	7207	PIA	2011-07-05	M	North	Genital	0	48	≥30	4816
NgBox16/14	4101	1330	6876	PIA	2011-07-07	M	North	Genital	0	17	<30	4816
NgBox16/15	847	29	1313	PIB	2011-07-05	M	South	Genital	0	22	<30	4341
NgBox16/16	301	29	359	PIB	2011-07-07	M	South	Genital	0	26	<30	4169
NgBox16/17	904	349	1415	PIB	2011-07-01	M	North	Genital	0	18	<30	4825
NgBox16/18	4104	1334	6886	PIA	2011-07-09	F	North	Genital	0	19	<30	4870
NgBox16/19	4146	1344	6943	PIB	2011-07-11	M	North	Genital	0	20	<30	4870
NgBox16/20	2569	241	4186	PIB	2011-07-11	M	South	Genital	0	36	≥30	4210
NgBox16/21	997	137	1582	PIB	2011-07-12	M		Genital	0	35	≥30	2480
NgBox16/22	4150	1341	6950	PIA	2011-07-13	F	South	Invasive	1	18	<30	4216
NgBox16/23	4	4	225	PIB	2011-07-07	M	South	Genital	0	26	<30	4109
NgBox16/24	4128	21	6927	PIB	2011-07-09	F	North	Genital	0	20	<30	4871
NgBox16/25	4101	1330	6876	PIA	2011-07-12	M	North	Genital	0	17	<30	4875
NgBox16/26	407	1343	6938	PIA	2011-07-13	F	North	Genital	0	20	<30	4870
NgBox16/27	4394	1439	7666	PIB	2011-07-11	F	North	Genital	0	31	≥30	4816
NgBox16/28	4104	1329	6937	PIA	2011-07-12	M	North	Genital	0	22	<30	4870
NgBox16/29	4533	1440	7648	PIB	2011-07-14	M	North	Genital	0	19	<30	4878
NgBox16/30	4112	1284	7179	PIA	2011-07-13	M	North	Genital	0	16	<30	4870
NgBox16/31	301	29	359	PIB	2011-07-18	M	South	Genital	0	22	<30	4170
NgBox16/32	14	33	21	PIB	2011-07-14	M	South	Anorectal	0	24	<30	4170
NgBox16/33	2569	241	4186	PIB	2011-07-15	F	South	Oropharangeal	0	37	≥30	4000
NgBox16/34	2280	1329	6863	PIB	2011-07-14	M	North	Genital	0	13	<30	4875
NgBox16/35	1840	29	3042	PIA	2011-07-15	F	South	Genital	0	16	<30	4000
NgBox16/36	2764	33	7269	PIB	2011-07-18	M	South	Genital	0	32	≥30	4000
NgBox16/37	2764	33	7269	PIB	2011-07-18	M	South	Anorectal	0	26	<30	4000
NgBox16/38	4101	1330	6876	PIA	2011-07-12	M	North	Other	0	38	≥30	4816
NgBox16/39	908	110	1407	PIB	2011-07-15	M	South	Genital	0	28	<30	4010
NgBox16/40	997	137	1582	PIB	2011-07-22	M	South	Genital	0	20	<30	4035
NgBox16/41	4	4	225	PIB	2011-07-19	M	South	Anorectal	0	26	<30	4000
NgBox16/42	4146	1344	6943	PIB	2011-07-15	F	North	Genital	0	20	<30	4875
NgBox16/43	4101	1330	6876	PIA	2011-07-20	F	North	Genital	0	16	<30	4891
NgBox16/44	4112	1284	7179	PIA	2011-07-15	M	North	Genital	0	16	<30	4875
NgBox16/45	1808	29	2992	PIB	2011-07-19	M	South	Genital	0	70	≥30	4560
NgBox16/46	4	4	225	PIB	2011-07-21	M	South	Oropharangeal	0	25	<30	4000
NgBox16/47	4101	1330	6876	PIA	2011-07-21	M	North	Genital	0	21	<30	4816
NgBox16/48	4101	1330	6876	PIA	2011-07-21	M	North	Genital	0	20	<30	4811
NgBox16/50	4112	1284	7179	PIA	2011-07-22	F	North	Genital	0	17	<30	4874
NgBox16/51	301	29	359	PIB	2011-07-26	M	South	Genital	0	34	≥30	4215
NgBox16/52	4655	29	7749	PIB	2011-07-22	M	South	Anorectal	0	23	<30	4113
NgBox16/53	1808	29	2992	PIB	2011-07-25	M	South	Genital	0	66	≥30	4207
NgBox16/55	3216	479	5309	PIB	2011-07-26	M	South	Genital	0	44	≥30	4213
NgBox16/56	3494	29	5836	PIB	2011-07-28	M	South	Genital	0	37	≥30	4215
NgBox16/57	1808	29	2992	PIB	2011-07-24	M	South	Genital	0	22	<30	4214
NgBox16/58	908	110	1407	PIB	2011-07-25	M	South	Genital	0	23	<30	4152
NgBox16/59	103	835	7188	PIA	2011-07-28	F	South	Genital	0	58	≥30	4573
NgBox16/60	4101	1330	6876	PIA	2011-07-28	M	North	Genital	0	22	<30	4874
NgBox16/62	4101	1382	7207	PIA	2011-07-29	M	North	Anorectal	0	18	<30	4816
NgBox16/63	4634	1440	7712	PIB	2011-08-03	M	North	Genital	0	19	<30	4871
NgBox16/64	90	29	758	PIA	2011-07-26	M	North	Genital	0	22	<30	4810
NgBox16/65	4656	1455	7750	PIB	2011-08-07	F	South	Genital	0	29	<30	4000
NgBox16/66	4104	1329	6937	PIA	2011-08-07	F	North	Genital	0	24	<30	4881
NgBox16/67	263	26	384	PIB	2011-08-01	F	South	Genital	0	39	≥30	4218
NgBox16/68	4657	1456	7751	PIA	2011-08-03	F	South	Genital	0	21	<30	4121
NgBox16/69	4101	1330	6876	PIA	2011-08-03	M	South	Genital	0	17	<30	4304
NgBox16/70	4101	1330	6876	PIA	2011-08-03	F	South	Genital	0	21	<30	4101
NgBox16/71	14	33	21	PIB	2011-08-07	M	South	Genital	0	23	<30	4032
NgBox16/72	4101	1330	6876	PIA	2011-08-05	M	South	Genital	0	44	≥30	4210
NgBox16/74	997	137	1582	PIB	2011-08-05	M	South	Genital	0	61	≥30	4215
NgBox16/75	4101	1334	6939	PIA	2011-08-01	F	North	Genital	0	16	<30	4874
NgBox16/76	227	32	5031	PIB	2011-08-03	M	South	Genital	0	21	<30	4000
NgBox16/77	14	33	21	PIB	2011-08-02	M	South	Oropharangeal	0	19	<30	4054
NgBox16/78	4394	1330	7343	PIB	2011-08-02	M	North	Genital	0	23	<30	4870
NgBox16/79	1808	29	2992	PIB	2011-08-04	M	South	Genital	0	38	≥30	4000
NgBox16/80	4444	1412	7414	PIA	2011-08-05	M	South	Oropharangeal	0	19	<30	4000
NgBox16/81	4658	29	7752	PIB	2011-08-05	M	North	Genital	0	41	≥30	4879
NgBox17/01	4101	1330	6876	PIA	2011-08-07	M	South	Genital	0	28	<30	4305
NgBox17/03	908	110	1407	PIB	2011-08-06	M	South	Anorectal	0	27	<30	4005
NgBox17/04	14	33	21	PIB	2011-08-08	M		Genital	0	28	<30	4740
NgBox17/05	4401	33	7354	PIB	2011-08-08	M	South	Other	0	43	≥30	4133
NgBox17/06	3229	137	5333	PIB	2011-08-08	M	South	Genital	0	21	<30	4000
NgBox17/07	4104	1334	6886	PIA	2011-08-12	M	South	Genital	0	42	≥30	4017
NgBox17/08	1808	29	2992	PIB	2011-08-09	M	North	Genital	0	51	≥30	4812
NgBox17/09	1808	29	2992	PIB	2011-08-11	F	South	Genital	0	28	<30	4114
NgBox17/10	4	28	6882	PIB	2011-08-12	M	South	Genital	0	28	<30	4000
NgBox17/12	2430	330	4729	PIB	2011-08-11	M		Genital	0	21	<30	O/S
NgBox17/13	4101	1330	6876	PIA	2011-08-10	F	North	Genital	0	23	<30	4871
NgBox17/14	4112	1284	7179	PIA	2011-08-11	F	North	Genital	0	40	≥30	4869
NgBox17/15	4099	349	6879	PIB	2011-08-10	M		Genital	0	22	<30	4700
NgBox17/16	4659	4	7753	PIB	2011-08-15	M	South	Genital	0	16	<30	4301
NgBox17/17	4656	1455	7750	PIB	2011-08-11	F	North	Genital	0	21	<30	4810
NgBox17/18	2941	430	7754	PIA	2011-08-12	M	North	Genital	0	41	≥30	4818
NgBox17/19	4534	1329	7657	PIB	2011-08-08	F	North	Genital	0	49	≥30	4870
NgBox17/20	4660	29	7755	PIB	2011-08-11	M	South	Oropharangeal	0	39	≥30	4020
NgBox17/21	908	110	1407	PIB	2011-08-11	M	South	Genital	0	38	≥30	4000
NgBox17/22	2893	29	4786	PIB	2011-08-15	M	South	Genital	0	38	≥30	4215
NgBox17/23	4634	1440	7712	PIB	2011-08-10	F	North	Genital	0	17	<30	4868
NgBox17/24	4104	1329	6937	PIA	2011-08-10	M	South	Genital	0	20	<30	4000
NgBox17/25	4661	1334	7756	PIB	2011-08-17	M	South	Genital	0	63	≥30	4101
NgBox17/26	1808	29	2992	PIB	2011-08-17	M	South	Oropharangeal	0	38	≥30	4215
NgBox17/27	4662	1098	7757	PIB	2011-08-17	M	South	Genital	0	70	≥30	4124
NgBox17/28	1808	29	2992	PIB	2011-08-16	M	South	Genital	0	49	≥30	4303
NgBox17/29	4143	29	6940	PIB	2011-08-15	M	South	Genital	0	32	≥30	4030
NgBox17/30	4104	1329	6937	PIA	2011-08-16	F	North	Invasive	1	16	<30	4869
NgBox17/31	4099	349	6879	PIB	2011-08-22	M	South	Genital	0	17	<30	4306
NgBox17/32	19	25	5268	PIB	2011-08-19	M		Genital	0	24	<30	4740
NgBox17/33	2893	29	4786	PIB	2011-08-23	M	South	Genital	0	25	<30	4069
NgBox17/34	4663	29	7758	PIB	2011-08-25	M		Genital	0	20	<30	4660
NgBox17/35	4664	349	7759	PIB	2011-08-24	M	South	Genital	0	15	<30	4303
NgBox17/36	4128	21	6927	PIB	2011-08-19	M	North	Genital	0	10	<30	4871
NgBox17/37	4101	1330	6876	PIA	2011-08-19	F	South	Genital	0	36	≥30	4220
NgBox17/38	14	33	21	PIB	2011-08-25	M	South	Genital	0	43	≥30	4151
NgBox17/39	4634	1440	7712	PIB	2011-08-24	F	North	Genital	0	22	<30	4807
NgBox17/40	4668	33	7763	PIB	2011-08-19	F	South	Genital	0	29	<30	4178
NgBox17/41	4146	1344	6943	PIB	2011-08-23	F	North	Genital	0	17	<30	4870
NgBox17/42	4101	1330	6876	PIA	2011-08-22	M	North	Genital	0	24	<30	4810
NgBox17/43	3048	125	7764	PIA	2011-08-25	M		Oropharangeal	0	19	<30	4670
NgBox17/44	1808	29	2992	PIB	2011-08-26	M	South	Genital	0	31	≥30	4051
NgBox17/45	4143	29	6940	PIB	2011-08-19	M	South	Genital	0	21	<30	4169
NgBox17/46	847	29	1313	PIB	2011-08-29	M	South	Genital	0	39	≥30	4123
NgBox17/47	14	33	21	PIB	2011-09-03	M	South	Genital	0	52	≥30	4217
NgBox17/48	4143	29	6940	PIB	2011-08-31	M	South	Genital	0	32	≥30	4000
NgBox17/49	4099	349	6879	PIB	2011-09-06	F	South	Genital	0	18	<30	4487
NgBox17/51	147	197	1214	PIA	2011-08-24	M	North	Genital	0	24	<30	4825
NgBox17/52	4104	29	7765	PIA	2011-08-22	F	North	Genital	0	16	<30	4875
NgBox17/53	4313	29	7213	PIA	2011-08-30	F	North	Genital	0	22	<30	4883
NgBox17/54	4101	1330	6876	PIA	2011-09-02	M	North	Genital	0	32	≥30	4880
NgBox17/55	3494	29	5836	PIB	2011-08-26	M	South	Oropharangeal	0	34	≥30	4115
NgBox17/56	1808	29	2992	PIB	2011-09-07	M	South	Genital	0	52	≥30	4507
NgBox17/57	90	137	1691	PIA	2011-09-04	M	South	Genital	0	29	<30	4118
NgBox17/58	1808	29	2992	PIB	2011-08-29	M	South	Genital	0	26	<30	4031
NgBox17/59	14	33	21	PIB	2011-09-06	M	South	Anorectal	0	25	<30	4215
NgBox17/60	4101	1330	6876	PIA	2011-09-05	F		Genital	0	27	<30	2470
NgBox17/61	4143	29	6940	PIB	2011-09-03	M		Genital	0	48	≥30	2450
NgBox17/62	4669	1458	7766	PIB	2011-09-07	M	South	Genital	0	40	≥30	4350
NgBox17/63	14	33	21	PIB	2011-09-06	M	South	Oropharangeal	0	41	≥30	4000
NgBox17/64	2893	29	4786	PIB	2011-09-07	M	South	Genital	0	21	<30	4000
NgBox17/66	847	29	1313	PIB	2011-09-09	F	South	Genital	0	36	≥30	4124
NgBox17/67	1808	29	2992	PIB	2011-09-09	M	South	Anorectal	0	52	≥30	4000
NgBox17/68	4099	349	6879	PIB	2011-09-05	F		Genital	0	16	<30	4713
NgBox17/69	4112	1284	7179	PIA	2011-09-05	F	North	Genital	0	18	<30	4875
NgBox17/70	3696	29	6280	PIB	2011-09-12	M	North	Anorectal	0	24	<30	4810
NgBox17/71	4390	33	7337	PIB	2011-09-13	M	South	Genital	0	21	<30	4170
NgBox17/72	262	1332	6880	PIB	2011-09-12	M	South	Anorectal	0	48	≥30	4031
NgBox17/73	4533	1440	7648	PIB	2011-09-12	M	North	Genital	0	25	<30	4870
NgBox17/75	1808	29	2992	PIB	2011-09-19	M	South	Genital	0	44	≥30	4020
NgBox17/77	407	1284	7767	PIA	2011-09-14	M	North	Genital	0	21	<30	4870
NgBox17/78	4104	1329	6937	PIA	2011-09-14	M	North	Genital	0	16	<30	4870
NgBox17/79	4146	1344	6943	PIB	2011-09-13	F	North	Genital	0	21	<30	4868
NgBox17/80	4533	1440	7648	PIB	2011-09-13	F	North	Genital	0	28	<30	4870
NgBox17/81	4534	1329	7657	PIB	2011-09-13	F	North	Genital	0	40	≥30	4869
NgBox18/01	4670	1178	7768	PIA	2011-09-14	M	South	Genital	0	35	≥30	4034
NgBox18/03	1808	29	2992	PIB	2011-09-13	M	South	Anorectal	0	56	≥30	4170
NgBox18/06	4101	1330	6876	PIA	2011-09-12	F	North	Genital	0	18	<30	4825
NgBox18/07	28	29	995	PIB	2011-09-12	M	South	Genital	0	60	≥30	4053
NgBox18/08	4148	29	6946	PIB	2011-09-21	M	South	Genital	0	41	≥30	4000
NgBox18/09	14	33	21	PIB	2011-09-21	M	South	Genital	0	28	<30	4000
NgBox18/10	3704	29	6293	PIB	2011-09-23	M		Genital	0	53	≥30	2450
NgBox18/11	543	29	1288	PIB	2011-09-20	M	South	Genital	0	64	≥30	4304
NgBox18/12	1808	29	2992	PIB	2011-09-20	M	South	Genital	0	40	≥30	4510
NgBox18/13	4101	1330	6876	PIA	2011-09-19	M	North	Genital	0	23	<30	4810
NgBox18/14	543	29	1288	PIB	2011-09-25	M	North	Genital	0	72	≥30	4883
NgBox18/15	4444	1412	7414	PIA	2011-09-23	M	South	Anorectal	0	36	≥30	4006
NgBox18/16	1808	29	2992	PIB	2011-09-25	M	South	Genital	0	55	≥30	4500
NgBox18/17	1808	29	2992	PIB	2011-09-23	M	South	Anorectal	0	45	≥30	4000
NgBox18/18	4390	33	7337	PIB	2011-09-22	M	South	Oropharangeal	0	41	≥30	4000
NgBox18/19	4101	1329	7209	PIA	2011-09-23	F	North	Genital	0	19	<30	4816
NgBox18/20	543	29	1288	PIB	2011-09-22	F	South	Genital	0	61	≥30	4304
NgBox18/21	4101	1334	6939	PIA	2011-09-22	F	North	Genital	0	27	<30	4876
NgBox18/22	4671	1459	7769	PIA	2011-09-27	M	South	Genital	0	19	<30	4000
NgBox18/23	407	1343	6938	PIA	2011-09-26	M	North	Genital	0	23	<30	4870
NgBox18/24	1914	110	3158	PIB	2011-09-30	M	South	Genital	0	24	<30	4069
NgBox18/25	4099	349	6879	PIB	2011-09-28	M	South	Genital	0	19	<30	4350
NgBox18/26	1808	29	2992	PIB	2011-09-28	M	South	Genital	0	26	<30	4215
NgBox18/27	105	3	4768	PIB	2011-09-28	M	South	Anorectal	0	26	<30	4215
NgBox18/29	2893	29	4786	PIB	2011-09-28	M	South	Genital	0	31	≥30	4170
NgBox18/31	4671	1459	7769	PIA	2011-09-27	F	South	Genital	0	24	<30	4034
NgBox18/32	14	33	21	PIB	2011-09-29	M	South	Oropharangeal	0	20	<30	4000
NgBox18/33	407	1343	6938	PIA	2011-09-29	M	North	Genital	0	25	<30	4874
NgBox18/34	4101	1330	6876	PIA	2011-09-28	F	North	Genital	0	25	<30	4871
NgBox18/35	4146	1344	6943	PIB	2011-09-29	F	North	Genital	0	16	<30	4868
NgBox18/36	28	29	995	PIB	2011-09-30	M		Genital	0	46	≥30	2482
NgBox18/37	4672	1460	7770	PIB	2011-10-01	M	North	Genital	0	23	<30	4810
NgBox18/38	4101	1330	6876	PIA	2011-09-19	M	North	Genital	0	18	<30	4825
NgBox18/39	1808	29	2992	PIB	2011-10-03	M	South	Genital	0	25	<30	4035
NgBox18/40	1050	98	1737	PIB	2011-10-05	M	South	Genital	0	33	≥30	4211
NgBox18/41	3494	29	5836	PIB	2011-10-04	M	South	Anorectal	0	54	≥30	4000
NgBox18/42	4663	29	7758	PIB	2011-10-04	M		Genital	0	18	<30	4650
NgBox18/43	4101	1330	6876	PIA	2011-10-04	F	North	Genital	0	21	<30	4870
NgBox18/44	263	26	384	PIB	2011-10-03	M	North	Genital	0	21	<30	4810
NgBox18/45	4310	4	7205	PIB	2011-10-04	M	South	Genital	0	40	≥30	4000
NgBox18/47	908	110	1407	PIB	2011-10-03	M	South	Genital	0	50	≥30	4006
NgBox18/48	4673	29	7771	PIB	2011-10-08	M	South	Genital	0	51	≥30	4350
NgBox18/49	4143	29	6940	PIB	2011-10-06	M	South	Genital	0	28	<30	4380
NgBox18/50	301	29	359	PIB	2011-10-07	M	South	Anorectal	0	47	≥30	4059
NgBox18/51	301	29	359	PIB	2011-10-06	M	South	Genital	0	20	<30	4000
NgBox18/52	4101	1382	7207	PIA	2011-10-06	M	North	Anorectal	0	18	<30	4816
NgBox18/53	4112	1284	7179	PIA	2011-10-11	F	North	Genital	0	15	<30	4814
NgBox18/54	4658	29	7752	PIB	2011-10-03	M	South	Anorectal	0	23	<30	4102
NgBox18/55	847	29	1313	PIB	2011-10-07	F		Genital	0	23	<30	4740
NgBox18/56	4101	29	7212	PIA	2011-10-07	F	North	Genital	0	18	<30	4871
NgBox18/57	847	29	1313	PIB	2011-10-09	M		Genital	0	25	<30	4740
NgBox18/58	1808	29	2992	PIB	2011-10-07	M	North	Genital	0	36	≥30	4810
NgBox18/59	4101	1330	6876	PIA	2011-10-06	M		Genital	0	16	<30	6467
NgBox18/60	4440	563	7437	PIB	2011-10-10	M	South	Genital	0	24	<30	4114
NgBox18/61	4679	29	7773	PIB	2011-10-12	M	South	Anorectal	0	22	<30	4152
NgBox18/62	1808	29	2992	PIB	2011-10-12	M	South	Anorectal	0	36	≥30	4005
NgBox18/63	847	29	1313	PIB	2011-10-12	F	South	Genital	0	30	≥30	4207
NgBox18/64	4101	1330	6876	PIA	2011-10-12	M	North	Genital	0	17	<30	4880
NgBox18/65	4128	21	6927	PIB	2011-10-11	F	North	Other	0	21	<30	4871
NgBox18/66	1403	1462	7774	PIA	2011-10-10	F	South	Genital	0	55	≥30	4500
NgBox18/67	3114	294	7775	PIA	2011-10-10	M	South	Genital	0	63	≥30	4563
NgBox18/68	4112	1284	7179	PIA	2011-10-10	F	North	Genital	0	20	<30	4870
NgBox18/69	4104	1329	6937	PIA	2011-10-12	F	North	Genital	0	22	<30	4870
NgBox18/70	4394	1330	7343	PIB	2011-10-11	M	North	Genital	0	29	<30	4870
NgBox18/71	4101	1330	6876	PIA	2011-10-12	F	North	Genital	0	18	<30	4870
NgBox18/72	4101	1330	6876	PIA	2011-10-15	F	North	Genital	0	18	<30	4880
NgBox18/73	4099	349	6879	PIB	2011-10-15	F		Genital	0	19	<30	4700
NgBox18/75	2569	241	4186	PIB	2011-10-21	M	South	Genital	0	22	<30	4101
NgBox18/77	4104	1329	6937	PIA	2011-10-14	F	North	Genital	0	23	<30	4814
NgBox18/78	1775	29	7776	PIB	2011-10-20	M	South	Genital	0	21	<30	4226
NgBox18/79	19	25	5268	PIB	2011-10-18	M	South	Genital	0	34	≥30	4215
NgBox18/80	3494	29	5836	PIB	2011-10-19	M	South	Anorectal	0	41	≥30	4061
NgBox18/81	4104	1329	6937	PIA	2011-10-19	F	North	Genital	0	23	<30	4870
NgBox19/01	147	1329	7665	PIA	2011-10-19	M	North	Genital	0	17	<30	4825
NgBox19/03	4101	1330	6876	PIA	2011-10-24	F	North	Genital	0	23	<30	4871
NgBox19/04	2415	149	7777	PIB	2011-10-19	M	South	Genital	0	21	<30	4352
NgBox19/05	4104	1329	6937	PIA	2011-10-21	F	North	Genital	0	27	<30	4875
NgBox19/06	4149	1463	7778	PIB	2011-10-19	M	North	Genital	0	18	<30	4871
NgBox19/07	908	110	1407	PIB	2011-10-20	M	North	Genital	0	28	<30	4812
NgBox19/08	4394	1439	7666	PIB	2011-10-22	F		Genital	0	23	<30	O/S
NgBox19/09	4394	1439	7666	PIB	2011-10-22	M	North	Other	0	29	<30	4814
NgBox19/10	4143	29	6940	PIB	2011-10-26	M	South	Genital	0	39	≥30	4000
NgBox19/11	147	1408	7406	PIA	2011-10-25	M		Genital	0	32	≥30	852
NgBox19/12	1808	29	2992	PIB	2011-10-25	M	South	Genital	0	23	<30	4014
NgBox19/13	289	19	7210	PIB	2011-10-25	M	South	Genital	0	15	<30	4305
NgBox19/14	1808	29	2992	PIB	2011-10-25	M	South	Oropharangeal	0	20	<30	4113
NgBox19/15	904	349	1415	PIB	2011-10-24	F	North	Genital	0	32	≥30	4870
NgBox19/16	4394	1330	7343	PIB	2011-10-24	F	North	Genital	0	27	<30	4825
NgBox19/17	4143	29	6940	PIB	2011-10-27	M	South	Genital	0	36	≥30	4005
NgBox19/18	407	1343	6938	PIA	2011-10-26	M	North	Genital	0	18	<30	4810
NgBox19/19	14	33	21	PIB	2011-10-26	M	South	Genital	0	42	≥30	4215
NgBox19/20	4104	1329	6937	PIA	2011-10-27	F	North	Genital	0	21	<30	4878
NgBox19/21	4101	1330	6876	PIA	2011-10-28	F	North	Genital	0	19	<30	4870
NgBox19/22	4143	29	6940	PIB	2011-10-28	M	South	Oropharangeal	0	38	≥30	4000
NgBox19/23	4441	295	7407	PIB	2011-11-01	M	South	Genital	0	60	≥30	4102
NgBox19/24	4149	1329	6949	PIB	2011-11-02	M	North	Genital	0	23	<30	4871
NgBox19/25	2893	29	4786	PIB	2011-10-31	M	North	Genital	0	34	≥30	4873
NgBox19/26	90	1409	7408	PIA	2011-11-01	M	North	Invasive	1	22	<30	4810
NgBox19/27	4104	1329	6937	PIA	2011-11-02	M	North	Invasive	1	37	≥30	4811
NgBox19/28	147	1007	4819	PIA	2011-10-31	M		Genital	0	67	≥30	4670
NgBox19/29	3409	29	7409	PIB	2011-11-03	M	South	Genital	0	31	≥30	4051
NgBox19/30	4101	1410	7410	PIA	2011-11-02	F	North	Genital	0	30	≥30	4825
NgBox19/31	4101	1330	6876	PIA	2011-11-02	F	North	Genital	0	24	<30	4810
NgBox19/32	14	33	21	PIB	2011-11-04	M	South	Genital	0	30	≥30	4005
NgBox19/33	4442	953	7411	PIB	2011-11-01	M	South	Oropharangeal	0	23	<30	4000
NgBox19/34	2425	1411	7412	PIB	2011-11-03	M	South	Genital	0	26	<30	4000
NgBox19/35	262	1332	6880	PIB	2011-11-03	M	South	Anorectal	0	43	≥30	4000
NgBox19/36	90	29	758	PIA	2011-11-03	M		Genital	0	40	≥30	810
NgBox19/38	3409	29	7409	PIB	2011-11-07	M	South	Anorectal	0	36	≥30	4215
NgBox19/39	4443	349	7413	PIB	2011-11-01	M		Genital	0	22	<30	4701
NgBox19/40	301	29	359	PIB	2011-11-09	M	South	Anorectal	0	24	<30	4000
NgBox19/41	4146	1344	6943	PIB	2011-11-07	F	North	Genital	0	14	<30	4870
NgBox19/42	4143	29	6940	PIB	2011-11-10	M	South	Genital	0	30	≥30	4000
NgBox19/43	908	110	1407	PIB	2011-11-09	M	South	Anorectal	0	21	<30	4560
NgBox19/44	2569	241	4186	PIB	2011-11-09	M	South	Genital	0	30	≥30	4020
NgBox19/45	4099	349	6879	PIB	2011-11-08	F	North	Genital	0	17	<30	4880
NgBox19/46	543	899	4278	PIB	2011-11-12	F	South	Genital	0	23	<30	4218
NgBox19/47	4143	29	6940	PIB	2011-11-14	M	South	Genital	0	36	≥30	4006
NgBox19/48	4101	1330	6876	PIA	2011-11-12	F	South	Other	0	14	<30	4110
NgBox19/50	407	1343	6938	PIA	2011-11-12	M	North	Genital	0	28	<30	4880
NgBox19/51	4394	1330	7343	PIB	2011-11-12	F	North	Other	0	33	≥30	4814
NgBox19/52	4444	1412	7414	PIA	2011-11-09	M	North	Genital	0	36	≥30	4810
NgBox19/53	4394	1330	7343	PIB	2011-11-07	F	North	Genital	0	18	<30	4811
NgBox19/54	543	107	4676	PIB	2011-11-14	M	South	Genital	0	58	≥30	4215
NgBox19/55	543	107	4676	PIB	2011-11-14	F	South	Genital	0	53	≥30	4215
NgBox19/56	301	29	359	PIB	2011-11-14	M	South	Genital	0	32	≥30	4114
NgBox19/57	4443	349	7413	PIB	2011-11-11	F		Genital	0	19	<30	4700
NgBox19/58	14	33	21	PIB	2011-11-14	M	South	Genital	0	19	<30	4215
NgBox19/59	4446	29	7415	PIB	2011-11-15	M	South	Anorectal	0	47	≥30	4074
NgBox19/60	4292	35	7175	PIB	2011-11-16	F	South	Genital	0	15	<30	4505
NgBox19/61	1808	29	2992	PIB	2011-11-16	M	South	Genital	0	46	≥30	4000
NgBox19/62	4447	21	7416	PIB	2011-11-15	M	North	Genital	0	31	≥30	4830
NgBox19/63	14	33	21	PIB	2011-11-19	M	South	Anorectal	0	28	<30	4060
NgBox19/65	227	26	190	PIB	2011-11-11	M	South	Genital	0	23	<30	4215
NgBox19/66	4104	1334	6886	PIA	2011-11-17	M	North	Genital	0	19	<30	4870
NgBox19/67	193	27	6898	PIB	2011-11-23	F		Genital	0	19	<30	2480
NgBox19/68	1808	29	2992	PIB	2011-11-17	M	South	Genital	0	25	<30	4000
NgBox19/69	39	27	51	PIB	2011-11-10	F	South	Genital	0	19	<30	4000
NgBox19/70	1808	29	2992	PIB	2011-11-17	M	South	Anorectal	0	25	<30	4109
NgBox19/71	262	1332	6880	PIB	2011-11-21	M	South	Genital	0	35	≥30	4013
NgBox19/72	90	110	334	PIA	2011-11-18	F	South	Genital	0	55	≥30	4130
NgBox19/73	4143	29	6940	PIB	2011-11-24	M	South	Genital	0	27	<30	4157
NgBox19/74	61	27	356	PIB	2011-11-23	F	South	Genital	0	19	<30	4505
NgBox19/75	4401	33	7354	PIB	2011-11-22	M	South	Genital	0	28	<30	4017
NgBox19/76	4101	1330	6876	PIA	2011-11-21	F	North	Genital	0	32	≥30	4870
NgBox19/77	4099	349	6879	PIB	2011-11-21	F	South	Genital	0	30	≥30	4501
NgBox19/78	4099	349	6879	PIB	2011-11-21	M		Genital	0	32	≥30	4701
NgBox19/79	4101	1330	6876	PIA	2011-11-15	F	North	Genital	0	23	<30	4812
NgBox19/80	103	4	1941	PIA	2011-11-19	F	South	Genital	0	22	<30	4013
NgBox19/81	2569	241	4186	PIB	2011-11-18	F	South	Genital	0	23	<30	4560
NgBox20/01	1808	29	2992	PIB	2011-11-21	M	South	Genital	0	28	<30	4064
NgBox20/02	4394	1330	7343	PIB	2011-11-22	M	South	Genital	0	21	<30	4207
NgBox20/03	4101	1330	6876	PIA	2011-11-21	M	South	Genital	0	16	<30	4184
NgBox20/04	785	60	3611	PIB	2011-11-23	M	South	Genital	0	30	≥30	4152
NgBox20/05	301	29	359	PIB	2011-11-30	M	South	Genital	0	55	≥30	4500
NgBox20/06	4448	98	7417	PIB	2011-11-28	F	South	Genital	0	22	<30	4500
NgBox20/07	316	27	7419	PIB	2011-11-24	F	South	Genital	0	21	<30	4127
NgBox20/08	2893	29	4786	PIB	2011-11-24	M	North	Genital	0	42	≥30	4879
NgBox20/09	4101	1330	6876	PIA	2011-11-24	M	North	Genital	0	25	<30	4871
NgBox20/10	4101	1284	7336	PIA	2011-11-27	M	North	Eye	0	18	<30	4860
NgBox20/11	4099	349	6879	PIB	2011-11-28	M		Genital	0	21	<30	4700
NgBox20/12	4099	349	6879	PIB	2011-11-28	M		Genital	0	42	≥30	4700
NgBox20/13	4401	33	7354	PIB	2011-11-24	M	South	Genital	0	31	≥30	4030
NgBox20/14	4143	29	6940	PIB	2011-11-28	M	South	Genital	0	42	≥30	4059
NgBox20/15	1808	29	2992	PIB	2011-11-29	M	South	Anorectal	0	37	≥30	4051
NgBox20/16	4101	1330	6876	PIA	2011-11-30	M	South	Genital	0	16	<30	4054
NgBox20/17	4104	1334	6886	PIA	2011-11-29	F	North	Genital	0	27	<30	4875
NgBox20/18	4101	1330	6876	PIA	2011-11-27	M	North	Genital	0	46	≥30	4871
NgBox20/19	2280	1329	6863	PIB	2011-11-24	F	North	Genital	0	18	<30	4875
NgBox20/20	4099	349	6879	PIB	2011-12-02	M		Genital	0	39	≥30	4713
NgBox20/21	4449	98	7418	PIB	2011-12-01	M	South	Anorectal	0	28	<30	4000
NgBox20/22	4101	1330	6876	PIA	2011-11-28	M	South	Genital	0	15	<30	4127
NgBox20/23	4099	349	6879	PIB	2011-11-29	M	North	Genital	0	27	<30	4810
NgBox20/24	697	295	1100	PIA	2011-12-02	F	South	Oropharangeal	0	22	<30	4215
NgBox20/35	4104	1329	6937	PIA	2011-12-01	M	North	Genital	0	27	<30	4870
NgBox20/36	3347	1381	7203	PIB	2011-12-04	M	North	Genital	0	22	<30	4878
NgBox20/37	1808	29	2992	PIB	2011-11-29	M	South	Anorectal	0	45	≥30	4519
NgBox20/38	4099	349	6879	PIB	2011-12-08	M	South	Genital	0	18	<30	4465
NgBox20/39	4099	349	6879	PIB	2011-12-10	M	South	Other	0	23	<30	4305
NgBox20/40	543	899	4278	PIB	2011-12-06	M		Genital	0	18	<30	2483
NgBox20/41	1808	29	2992	PIB	2011-12-07	M	South	Anorectal	0	23	<30	4000
NgBox20/42	14	33	21	PIB	2011-12-05	M	South	Oropharangeal	0	21	<30	4000
NgBox20/43	4099	349	6879	PIB	2011-12-04	M		Genital	0	17	<30	4730
NgBox20/44	4304	29	7204	PIA	2011-12-09	M	South	Genital	0	26	<30	4000
NgBox20/45	4143	29	6940	PIB	2011-12-07	M	South	Genital	0	39	≥30	4005
NgBox20/46	4	4	225	PIB	2011-12-06	M	South	Anorectal	0	25	<30	4000
NgBox20/47	4147	1329	6944	PIB	2011-12-01	F	North	Genital	0	19	<30	4875
NgBox20/48	4112	1284	7179	PIA	2011-12-06	M	North	Genital	0	20	<30	4870
NgBox20/49	4101	1330	6876	PIA	2011-12-06	F	North	Genital	0	21	<30	4871
NgBox20/50	4101	1330	6876	PIA	2011-12-14	F	North	Genital	0	14	<30	4872
NgBox20/51	1808	29	2992	PIB	2011-12-08	M	South	Genital	0	30	≥30	4000
NgBox20/52	14	33	21	PIB	2011-12-08	M	South	Oropharangeal	0	19	<30	4054
NgBox20/53	2043	110	3378	PIB	2011-12-09	M	South	Other	0	29	<30	4019
NgBox20/54	301	29	359	PIB	2011-12-12	M	South	Genital	0	41	≥30	4000
NgBox20/55	1808	29	2992	PIB	2011-12-08	M	South	Anorectal	0	44	≥30	4560
NgBox20/56	227	26	190	PIB	2011-12-14	F		Genital	0	26	<30	4721
NgBox20/57	4310	4	7205	PIB	2011-12-09	M	South	Genital	0	41	≥30	4217
NgBox20/58	4101	1330	6876	PIA	2011-12-12	F	North	Genital	0	31	≥30	4825
NgBox20/59	4101	1330	6876	PIA	2011-12-09	M	North	Eye	0	0	<30	4830
NgBox20/60	14	33	21	PIB	2011-12-13	M	South	Genital	0	27	<30	4215
NgBox20/61	301	29	359	PIB	2011-12-13	M	South	Anorectal	0	41	≥30	4000
NgBox20/62	847	29	1313	PIB	2011-12-12	F	South	Genital	0	20	<30	4114
NgBox20/63	391	33	5267	PIB	2011-12-13	M	South	Anorectal	0	22	<30	4000
NgBox20/64	4146	1344	6943	PIB	2011-12-12	F	North	Genital	0	17	<30	4870
NgBox20/65	4101	1330	6876	PIA	2011-12-14	F	North	Genital	0	25	<30	4871
NgBox20/66	4104	1329	6937	PIA	2011-12-13	F	North	Genital	0	17	<30	4875
NgBox20/67	1808	29	2992	PIB	2011-12-14	M	South	Anorectal	0	42	≥30	4010
NgBox20/68	2893	29	4786	PIB	2011-12-16	M	South	Genital	0	63	≥30	4210
NgBox20/69	263	26	384	PIB	2011-12-14	F	North	Genital	0	21	<30	4869
NgBox20/70	4311	29	7206	PIB	2011-12-12	M		Genital	0	34	≥30	812
NgBox20/71	4101	1330	6876	PIA	2011-12-15	M	North	Genital	0	20	<30	4825
NgBox20/72	4292	35	7175	PIB	2011-12-17	M	South	Genital	0	26	<30	4012
NgBox20/73	53	21	147	PIB	2011-12-19	M	South	Genital	0	19	<30	4000
NgBox20/74	4128	21	6927	PIB	2011-12-15	M	North	Genital	0	26	<30	4871
NgBox20/75	4101	1330	6876	PIA	2011-12-18	F	North	Genital	0	15	<30	4871
NgBox20/76	1808	29	2992	PIB	2011-12-19	M	South	Anorectal	0	50	≥30	4215
NgBox20/77	4101	1382	7207	PIA	2011-12-19	M	North	Genital	0	52	≥30	4816
NgBox20/78	4101	1330	6876	PIA	2011-12-22	M	South	Other	0	15	<30	4131
NgBox20/79	4101	1330	6876	PIA	2011-12-21	M	North	Genital	0	17	<30	4825
NgBox20/80	1808	29	2992	PIB	2011-12-19	M	South	Oropharangeal	0	50	≥30	4215
NgBox20/81	3652	92	7208	PIB	2011-12-22	M	South	Genital	0	45	≥30	4567
NgBox21/01	4099	349	6879	PIB	2011-12-20	M	South	Genital	0	23	<30	4519
NgBox21/02	301	29	359	PIB	2011-12-22	M	South	Anorectal	0	37	≥30	4121
NgBox21/03	1808	29	2992	PIB	2011-12-23	M	South	Genital	0	54	≥30	4005
NgBox21/04	4101	1329	7209	PIA	2011-12-22	F	North	Genital	0	20	<30	4871
NgBox21/05	1808	29	2992	PIB	2011-12-26	M	South	Genital	0	48	≥30	4210
NgBox21/06	543	899	4278	PIB	2011-12-24	M	South	Genital	0	21	<30	4275
NgBox21/07	3558	4	5967	PIB	2011-12-27	M		Genital	0	52	≥30	2010
NgBox21/08	4292	35	7175	PIB	2011-12-21	M	South	Genital	0	20	<30	4111
NgBox21/09	14	33	21	PIB	2011-12-27	M		Genital	0	25	<30	O/S
NgBox21/10	4143	29	6940	PIB	2011-12-30	M	South	Other	0	31	≥30	4068
NgBox21/11	289	19	7210	PIB	2012-01-02	M	South	Genital	0	17	<30	4066
NgBox21/12	1808	29	2992	PIB	2011-12-29	M	South	Genital	0	41	≥30	4306
NgBox21/13	4101	1330	6876	PIA	2011-12-28	M	South	Genital	0	22	<30	4510
NgBox21/14	14	29	4270	PIB	2011-12-28	M	South	Anorectal	0	32	≥30	4120
NgBox21/15	14	29	4270	PIB	2011-12-26	M	South	Genital	0	42	≥30	4120
NgBox21/16	697	295	1100	PIA	2011-12-22	M		Genital	0	21	<30	O/S
NgBox21/17	4101	1330	6876	PIA	2011-12-28	F	North	Invasive	1	17	<30	4869	52755	ERS11906292
NgBox21/18	4101	1330	6876	PIA	2012-01-01	M		Genital	0	24	<30	2470
NgBox21/19	4101	1330	6876	PIA	2011-12-29	M	South	Genital	0	18	<30	4503
NgBox21/20	1808	29	2992	PIB	2011-12-28	M	South	Genital	0	21	<30	4116
NgBox21/21	4312	1329	7211	PIA	2011-12-30	M	North	Genital	0	48	≥30	4810
NgBox21/22	90	21	436	PIA	2011-12-27	M		Genital	0	26	<30	O/S
NgBox21/23	407	1343	6938	PIA	2011-12-30	M	North	Genital	0	26	<30	4870
NgBox21/24	4101	1330	6876	PIA	2012-01-07	M	North	Genital	0	33	≥30	4872
NgBox21/25	14	33	21	PIB	2012-01-03	M	South	Genital	0	41	≥30	4102
NgBox21/26	262	1332	6880	PIB	2011-12-22	M	South	Anorectal	0	40	≥30	4000
NgBox21/27	4104	1329	6937	PIA	2012-01-08	M	South	Genital	0	34	≥30	4506
NgBox21/28	1903	110	3149	PIB	2012-01-05	M	South	Anorectal	0	30	≥30	4051
NgBox21/29	4101	29	7212	PIA	2012-01-03	M	North	Genital	0	17	<30	4814
NgBox21/30	4313	29	7213	PIA	2012-01-04	M	North	Genital	0	21	<30	4868
NgBox21/31	4	28	6882	PIB	2012-01-07	F	South	Genital	0	22	<30	4350
NgBox21/32	1840	29	3042	PIA	2012-01-03	M	North	Genital	0	33	≥30	4816
NgBox21/33	4101	1330	6876	PIA	2012-01-04	F	North	Genital	0	15	<30	4880
NgBox21/34	4313	29	7213	PIA	2012-01-03	F	North	Genital	0	21	<30	4870
NgBox21/36	2569	241	4186	PIB	2012-01-09	M	South	Genital	0	25	<30	4000
NgBox21/37	3494	29	5836	PIB	2012-01-07	M		Genital	0	63	≥30	4655
NgBox21/38	4389	129	7335	PIB	2012-01-04	M	South	Genital	0	26	<30	4103
NgBox21/39	14	33	21	PIB	2012-01-04	M	South	Genital	0	36	≥30	4207
NgBox21/40	4101	1284	7336	PIA	2012-01-13	M		Genital	0	27	<30	2470
NgBox21/43	4390	33	7337	PIB	2012-01-09	M	South	Oropharangeal	0	18	<30	4000
NgBox21/44	3402	129	7338	PIA	2012-01-09	M	South	Genital	0	49	≥30	4133
NgBox21/45	4391	272	7339	PIB	2012-01-10	M	South	Genital	0	20	<30	4209
NgBox21/46	591	4	7340	PIB	2012-01-08	M		Genital	0	26	<30	812
NgBox21/47	4101	1330	6876	PIA	2012-01-11	F	North	Genital	0	19	<30	4890
NgBox21/50	4101	1330	6876	PIA	2012-01-11	F	North	Genital	0	22	<30	4870
NgBox21/51	4392	1404	7341	PIB	2012-01-11	M	North	Genital	0	48	≥30	4875
NgBox21/52	4128	21	6927	PIB	2012-01-12	M	North	Genital	0	18	<30	4871
NgBox21/53	3377	137	5578	PIB	2012-01-16	M	South	Genital	0	36	≥30	4000
NgBox21/54	301	29	359	PIB	2012-01-17	M	South	Anorectal	0	22	<30	4000
NgBox21/55	289	19	7210	PIB	2012-01-16	M	South	Genital	0	18	<30	4000
NgBox21/56	4393	5	7342	PIB	2012-01-16	M	South	Genital	0	23	<30	4030
NgBox21/57	1808	29	2992	PIB	2012-01-16	F	South	Genital	0	20	<30	4122
NgBox21/58	4099	349	6879	PIB	2012-01-18	M	North	Genital	0	18	<30	4879
NgBox21/59	904	349	1415	PIB	2012-01-13	M	North	Genital	0	22	<30	4888
NgBox21/60	4101	1330	6876	PIA	2012-01-17	M	North	Genital	0	18	<30	4816
NgBox21/61	4394	1330	7343	PIB	2012-01-14	F	North	Eye	0	0	<30	4820
NgBox21/62	4104	1334	6886	PIA	2012-01-13	F	North	Genital	0	24	<30	4875
NgBox21/63	4104	1329	6937	PIA	2012-01-17	M	North	Genital	0	21	<30	4817
NgBox21/65	1808	29	2992	PIB	2012-01-16	M	South	Oropharangeal	0	27	<30	4215
NgBox21/66	4395	399	7344	PIB	2012-01-18	M	South	Anorectal	0	29	<30	4215
NgBox21/67	4396	563	7345	PIB	2012-01-22	F	South	Genital	0	27	<30	4169
NgBox21/69	402	60	7346	PIA	2012-01-24	M	South	Genital	0	25	<30	4000
NgBox21/70	14	33	21	PIB	2012-01-24	M	South	Oropharangeal	0	24	<30	4000
NgBox21/71	4397	29	7347	PIB	2012-01-24	M	South	Anorectal	0	20	<30	4000
NgBox21/72	4101	1330	6876	PIA	2012-01-18	F	South	Genital	0	34	≥30	4510
NgBox21/73	14	33	21	PIB	2012-01-25	M	South	Oropharangeal	0	30	≥30	4000
NgBox21/74	14	33	21	PIB	2012-01-04	M	South	Anorectal	0	22	<30	4560
NgBox21/75	263	26	384	PIB	2012-01-16	M	South	Genital	0	20	<30	4000
NgBox21/76	4143	29	6940	PIB	2012-01-11	M	South	Oropharangeal	0	53	≥30	4000
NgBox21/77	4101	1330	6876	PIA	2012-01-23	M	North	Genital	0	20	<30	4872
NgBox21/78	301	29	359	PIB	2012-01-30	M	South	Genital	0	20	<30	4509
NgBox21/79	4394	1330	7343	PIB	2012-01-24	M	North	Genital	0	26	<30	4820
NgBox21/80	14	33	21	PIB	2012-01-27	M	South	Genital	0	34	≥30	4215
NgBox21/81	4143	29	6940	PIB	2012-01-30	M	South	Genital	0	28	<30	4005
NgBox22/01	4099	349	6879	PIB	2012-01-24	M		Genital	0	21	<30	4700
NgBox22/02	2569	241	4186	PIB	2012-01-27	M	South	Genital	0	54	≥30	4508
NgBox22/03	908	110	1407	PIB	2012-01-27	M	South	Oropharangeal	0	42	≥30	4064
NgBox22/04	2569	241	4186	PIB	2012-01-28	F	South	Genital	0	21	<30	4217
NgBox22/05	4143	29	6940	PIB	2012-01-30	M	South	Genital	0	26	<30	4032
NgBox22/06	1808	29	2992	PIB	2012-01-26	M		Genital	0	24	<30	O/S
NgBox22/07	14	33	21	PIB	2012-01-30	M	South	Anorectal	0	46	≥30	4005
NgBox22/08	1808	29	2992	PIB	2012-01-31	M	South	Anorectal	0	44	≥30	4101
NgBox22/09	543	899	4278	PIB	2012-01-30	F	South	Genital	0	20	<30	4214
NgBox22/10	402	33	5785	PIA	2012-01-31	M	South	Genital	0	25	<30	4562
NgBox22/11	4398	21	7348	PIB	2012-02-01	M	South	Genital	0	24	<30	4000
NgBox22/12	1808	29	2992	PIB	2012-02-02	M	South	Genital	0	24	<30	4011
NgBox22/13	14	33	21	PIB	2012-02-01	M	South	Genital	0	24	<30	4103
NgBox22/14	227	32	5031	PIB	2012-02-01	M	South	Genital	0	33	≥30	4000
NgBox22/15	1808	29	2992	PIB	2012-02-03	M	South	Genital	0	26	<30	4000
NgBox22/16	4399	1405	7349	PIB	2012-02-03	F	South	Genital	0	22	<30	4220
NgBox22/17	2759	92	7350	PIA	2012-02-04	M	South	Genital	0	34	≥30	4356
NgBox22/18	4400	1331	7351	PIB	2012-02-10	M	North	Genital	0	17	<30	4871
NgBox22/19	147	349	7126	PIA	2012-02-07	F	North	Invasive	1	32	≥30	4825	52756	ERS11906293
NgBox22/20	908	110	1407	PIB	2012-02-13	M	South	Genital	0	21	<30	4061
NgBox22/21	908	110	1407	PIB	2012-02-07	M	South	Genital	0	55	≥30	4215
NgBox22/23	908	110	1407	PIB	2012-02-08	M		Genital	0	33	≥30	4700
NgBox22/25	4099	1406	7659	PIB	2012-02-10	F	North	Genital	0	30	≥30	4810
NgBox22/26	1489	563	2400	PIB	2012-02-14	M	South	Genital	0	22	<30	4211
NgBox22/27	2893	29	4786	PIB	2012-02-11	M	North	Genital	0	28	<30	4877
NgBox22/28	2656	29	7353	PIB	2012-02-14	M	South	Anorectal	0	61	≥30	4152
NgBox22/29	4101	1330	6876	PIA	2012-02-14	M	North	Genital	0	19	<30	4814
NgBox22/30	904	349	1415	PIB	2012-02-16	M	North	Genital	0	20	<30	4868
NgBox22/31	4104	1334	6886	PIA	2012-02-13	M	North	Genital	0	27	<30	4870
NgBox22/32	2893	29	4786	PIB	2012-02-16	M	North	Genital	0	47	≥30	4870
NgBox22/33	4104	1329	6937	PIA	2012-02-14	F	North	Genital	0	38	≥30	4869
NgBox22/34	4099	349	6879	PIB	2012-02-15	F	South	Genital	0	23	<30	4487
NgBox22/36	4101	1330	6876	PIA	2012-02-06	F	North	Genital	0	20	<30	4870
NgBox22/37	14	33	21	PIB	2012-02-16	M	South	Oropharangeal	0	26	<30	4000
NgBox22/38	4099	349	6879	PIB	2012-02-17	M	South	Genital	0	18	<30	4020
NgBox22/39	147	555	2343	PIA	2012-02-15	M		Genital	0	47	≥30	2230
NgBox22/40	227	26	190	PIB	2012-02-17	F	South	Genital	0	16	<30	4305
NgBox22/41	279	25	5993	PIB	2012-02-16	M	South	Anorectal	0	25	<30	4000
NgBox22/42	4401	33	7354	PIB	2012-02-09	M	South	Genital	0	23	<30	4114
NgBox22/43	4101	1330	6876	PIA	2012-02-16	M	North	Genital	0	16	<30	4860
NgBox22/45	2280	1329	6863	PIB	2012-02-17	F	North	Genital	0	40	≥30	4816
NgBox22/46	4104	1334	6886	PIA	2012-02-20	F	North	Genital	0	17	<30	4870
NgBox22/47	4072	110	6813	PIB	2012-02-17	M	South	Oropharangeal	0	25	<30	4000
NgBox22/48	14	33	21	PIB	2012-02-20	M	South	Oropharangeal	0	21	<30	4000
NgBox22/49	14	33	21	PIB	2012-02-21	M	South	Anorectal	0	32	≥30	4171
NgBox22/50	2569	241	4186	PIB	2012-02-23	M	South	Genital	0	19	<30	4109
NgBox22/51	263	26	384	PIB	2012-02-23	M	South	Genital	0	22	<30	4011
NgBox22/52	105	3	4768	PIB	2012-02-21	M	South	Oropharangeal	0	24	<30	4000
NgBox22/53	4101	1330	6876	PIA	2012-02-21	F	North	Genital	0	21	<30	4871
NgBox22/54	14	33	21	PIB	2012-02-25	M	South	Genital	0	32	≥30	4171
NgBox22/56	4101	349	7705	PIA	2012-02-22	M	North	Genital	0	18	<30	4810
NgBox22/57	14	33	21	PIB	2012-02-22	M	South	Oropharangeal	0	28	<30	4000
NgBox22/58	1489	563	2400	PIB	2012-02-22	F	South	Genital	0	21	<30	4211
NgBox22/59	105	3	4768	PIB	2012-02-27	M	South	Genital	0	20	<30	4034
NgBox22/60	4148	29	6946	PIB	2012-02-27	M	South	Genital	0	19	<30	4012
NgBox22/61	908	110	1407	PIB	2012-02-27	F		Genital	0	41	≥30	2350
NgBox22/62	105	3	4768	PIB	2012-02-23	M	South	Genital	0	38	≥30	4000
NgBox22/63	4443	349	7413	PIB	2012-02-24	M		Genital	0	29	<30	4701
NgBox22/64	4143	29	6940	PIB	2012-02-29	M	South	Anorectal	0	29	<30	4101
NgBox22/65	1808	29	2992	PIB	2012-02-26	F	South	Genital	0	39	≥30	4500
NgBox22/66	4143	29	6940	PIB	2012-02-28	M	South	Genital	0	25	<30	4000
NgBox22/67	2569	241	4186	PIB	2012-02-28	M	South	Genital	0	32	≥30	4215
NgBox22/68	3494	29	5836	PIB	2012-02-28	M	South	Genital	0	22	<30	4078
NgBox22/69	14	33	21	PIB	2012-02-27	M	South	Anorectal	0	26	<30	4114
NgBox22/70	1808	29	2992	PIB	2012-02-22	M		Genital	0	27	<30	4700
NgBox22/71	4099	349	6879	PIB	2012-02-28	M		Genital	0	15	<30	4700
NgBox22/72	4905	29	8176	PIB	2012-02-29	M	South	Genital	0	25	<30	4300
NgBox22/73	4146	1344	6943	PIB	2012-03-01	M	North	Genital	0	18	<30	4875
NgBox22/74	1808	29	2992	PIB	2012-03-06	M	South	Genital	0	23	<30	4000
NgBox22/75	952	107	1493	PIB	2012-03-05	F	South	Genital	0	63	≥30	4226
NgBox22/76	4101	1284	7336	PIA	2012-02-28	F	North	Genital	0	16	<30	4860
NgBox22/77	14	33	21	PIB	2012-03-02	M	South	Genital	0	34	≥30	4011
NgBox22/78	1678	33	6711	PIB	2012-02-25	M	South	Anorectal	0	44	≥30	4103
NgBox22/79	301	29	359	PIB	2012-03-03	M	South	Genital	0	25	<30	4151
NgBox22/80	251	91	2998	PIA	2012-03-05	M	South	Genital	0	31	≥30	4000
NgBox23/01	908	110	1407	PIB	2012-03-01	M		Genital	0	20	<30	4670
NgBox23/02	1808	29	2992	PIB	2012-03-06	M	South	Genital	0	49	≥30	4303
NgBox23/03	4099	349	6879	PIB	2012-03-06	F	North	Genital	0	26	<30	4814
NgBox23/05	262	267	1119	PIB	2012-03-02	M	South	Genital	0	22	<30	4000
NgBox23/06	4099	349	6879	PIB	2012-03-05	M	South	Genital	0	18	<30	4350
NgBox23/07	14	33	21	PIB	2012-03-05	M	South	Genital	0	25	<30	4000
NgBox23/08	4143	29	6940	PIB	2012-03-08	M	South	Genital	0	23	<30	4000
NgBox23/09	193	27	6898	PIB	2012-03-03	F	South	Genital	0	20	<30	4109
NgBox23/10	4906	29	8177	PIB	2012-03-01	M	South	Genital	0	46	≥30	4000
NgBox23/11	4099	349	6879	PIB	2012-03-05	F	South	Genital	0	14	<30	4350
NgBox23/12	4099	349	6879	PIB	2012-03-05	M		Genital	0	39	≥30	4720
NgBox23/13	908	110	1407	PIB	2012-03-09	M		Genital	0	29	<30	2025
NgBox23/14	601	1332	8178	PIB	2012-03-11	M	South	Oropharangeal	0	35	≥30	4005
NgBox23/15	4443	349	7413	PIB	2012-03-12	M	South	Genital	0	28	<30	4350
NgBox23/16	4099	349	6879	PIB	2012-03-06	M		Genital	0	18	<30	4700
NgBox23/17	4099	349	6879	PIB	2012-03-09	F	South	Genital	0	18	<30	4358
NgBox23/18	1808	29	2992	PIB	2012-03-07	M	South	Oropharangeal	0	69	≥30	4000
NgBox23/19	4099	349	6879	PIB	2012-03-09	F	North	Genital	0	30	≥30	4868
NgBox23/20	4101	1330	6876	PIA	2012-03-12	M		Genital	0	17	<30	2470
NgBox23/21	90	294	3228	PIA	2012-03-15	F	South	Genital	0	21	<30	4066
NgBox23/23	4672	1331	8179	PIB	2012-03-15	M	South	Genital	0	51	≥30	4152
NgBox23/24	4398	21	7348	PIB	2012-03-12	M	South	Genital	0	22	<30	4000
NgBox23/25	407	1343	6938	PIA	2012-03-12	M	North	Genital	0	29	<30	4880
NgBox23/26	1808	29	2992	PIB	2012-03-12	M	South	Genital	0	22	<30	4000
NgBox23/27	4101	349	7705	PIA	2012-03-11	F	North	Genital	0	56	≥30	4816
NgBox23/28	4907	1334	8180	PIB	2012-03-13	F	South	Genital	0	23	<30	4000
NgBox23/30	463	27	697	PIB	2012-03-13	M	South	Genital	0	23	<30	4000
NgBox23/31	4072	110	6813	PIB	2012-03-12	M		Anorectal	0	51	≥30	2010
NgBox23/32	14	33	21	PIB	2012-03-16	M	South	Anorectal	0	25	<30	4006
NgBox23/33	4148	29	6946	PIB	2012-03-15	M	South	Oropharangeal	0	33	≥30	4120
NgBox23/34	4104	1329	6937	PIA	2012-03-17	F	North	Genital	0	41	≥30	4880
NgBox23/35	1808	29	2992	PIB	2012-03-15	M	South	Genital	0	41	≥30	4012
NgBox23/36	4146	1329	6947	PIB	2012-03-15	F	North	Genital	0	16	<30	4880
NgBox23/37	161	1346	6948	PIA	2012-03-17	M		Eye	0	30	≥30	6051
NgBox23/38	4149	1329	6949	PIB	2012-03-19	M		Genital	0	28	<30	4740
NgBox23/40	4150	1341	6950	PIA	2012-03-19	M	South	Genital	0	17	<30	4209
NgBox23/41	1808	29	2992	PIB	2012-03-16	M	South	Anorectal	0	45	≥30	4000
NgBox23/42	4872	33	8181	PIB	2012-03-20	M	South	Genital	0	23	<30	4067
NgBox23/43	4104	1329	6937	PIA	2012-03-21	M	North	Genital	0	37	≥30	4876
NgBox23/44	908	110	1407	PIB	2012-03-24	M		Genital	0	22	<30	4740
NgBox23/45	1808	29	2992	PIB	2012-03-23	M	South	Anorectal	0	35	≥30	4000
NgBox23/47	4143	29	6940	PIB	2012-03-22	M	South	Genital	0	29	<30	4000
NgBox23/48	908	110	1407	PIB	2012-03-21	M	North	Genital	0	24	<30	4810
NgBox23/49	4104	1329	6937	PIA	2012-03-20	F	North	Genital	0	28	<30	4818
NgBox23/50	4149	1329	6949	PIB	2012-03-21	F		Invasive	1	22	<30	4710
NgBox23/51	4099	349	6879	PIB	2012-03-22	M		Genital	0	17	<30	4700
NgBox23/52	14	33	21	PIB	2012-03-23	M	South	Genital	0	30	≥30	4551
NgBox23/54	4101	1330	6876	PIA	2012-03-22	F	North	Genital	0	34	≥30	4810
NgBox23/56	4099	1406	7659	PIB	2012-03-21	M	North	Other	0	29	<30	4817
NgBox23/57	4104	1334	6886	PIA	2012-03-24	F	North	Invasive	1	49	≥30	4870	52757	ERS11906294
NgBox23/58	4104	1329	6937	PIA	2012-03-24	F	North	Genital	0	15	<30	4880
NgBox23/59	4143	29	6940	PIB	2012-03-21	M	South	Genital	0	26	<30	4000
NgBox23/60	4148	29	6946	PIB	2012-03-30	M	South	Genital	0	32	≥30	4064
NgBox23/61	4101	1330	6876	PIA	2012-03-26	F	North	Genital	0	13	<30	4815
NgBox23/62	14	33	21	PIB	2012-03-27	M	South	Anorectal	0	24	<30	4215
NgBox23/64	90	1044	4990	PIA	2012-03-26	M	South	Genital	0	44	≥30	4005
NgBox23/65	14	33	21	PIB	2012-03-28	M	South	Oropharangeal	0	25	<30	4215
NgBox23/66	14	33	21	PIB	2012-03-30	M	South	Anorectal	0	21	<30	4215
NgBox23/67	4101	1330	6876	PIA	2012-03-27	M	North	Genital	0	25	<30	4812
NgBox23/68	4149	1329	6949	PIB	2012-03-28	F		Genital	0	16	<30	4740
NgBox23/69	90	1044	4990	PIA	2012-04-04	M	South	Genital	0	42	≥30	4000
NgBox23/70	4443	349	7413	PIB	2012-03-26	M	South	Genital	0	21	<30	4510
NgBox23/72	4148	29	6946	PIB	2012-04-05	M	South	Genital	0	32	≥30	4000
NgBox23/73	4104	1329	6937	PIA	2012-02-15	M	North	Invasive	1	29	<30	4814
NgBox23/74	4104	1329	6937	PIA	2012-02-23	F	North	Invasive	1	20	<30	4814
NgBox23/75	407	1343	6938	PIA	2012-01-06	F	North	Invasive	1	29	<30	4815
NgBox23/76	4101	1330	6876	PIA	2011-08-07	F	North	Invasive	1	17	<30	4814
NgBox23/78	4101	1334	6939	PIA	2011-04-04	F	North	Invasive	1	15	<30	4810	52754	ERS11906295
NgBox23/79	4101	349	7705	PIA	2012-03-29	M	North	Genital	0	20	<30	4816
NgBox23/80	4	4	225	PIB	2012-03-31	M	South	Genital	0	42	≥30	4034
NgBox23/81	4099	349	6879	PIB	2012-04-02	M	South	Genital	0	18	<30	4215
NgBox24/01	4101	1284	7336	PIA	2012-04-02	F	North	Genital	0	16	<30	4811
NgBox24/02	14	33	21	PIB	2012-04-05	M	South	Oropharangeal	0	29	<30	4005
NgBox24/03	1808	29	2992	PIB	2012-04-05	M	North	Oropharangeal	0	57	≥30	4870
NgBox24/04	4101	1330	6876	PIA	2012-04-03	M	North	Genital	0	31	≥30	4890
NgBox24/05	4101	1330	6876	PIA	2012-03-31	M	North	Genital	0	25	<30	4870
NgBox24/06	14	33	21	PIB	2012-04-04	M	South	Genital	0	26	<30	4069
NgBox24/07	4	29	2493	PIB	2012-04-02	M	South	Genital	0	20	<30	4300
NgBox24/08	4099	349	6879	PIB	2012-03-26	F	South	Genital	0	31	≥30	4070
NgBox24/09	4779	29	8017	PIB	2012-04-03	M	South	Genital	0	43	≥30	4000
NgBox24/11	4101	349	7705	PIA	2012-04-04	M	North	Genital	0	32	≥30	4810
NgBox24/12	4101	1330	6876	PIA	2012-04-02	F	North	Genital	0	16	<30	4810
NgBox24/13	4101	1330	6876	PIA	2012-04-11	F	South	Genital	0	17	<30	4127
NgBox24/14	14	33	21	PIB	2012-04-11	M	South	Genital	0	21	<30	4306
NgBox24/15	316	27	7419	PIB	2012-04-08	M	South	Genital	0	42	≥30	4078
NgBox24/16	908	110	1407	PIB	2012-04-11	M	South	Genital	0	38	≥30	4064
NgBox24/17	4146	1344	6943	PIB	2012-04-12	M		Genital	0	24	<30	4701
NgBox24/18	2569	241	4186	PIB	2012-04-11	F	South	Genital	0	19	<30	4065
NgBox24/19	14	33	21	PIB	2012-04-12	M	South	Anorectal	0	24	<30	4215
NgBox24/20	820	92	8018	PIA	2012-04-13	F	North	Oropharangeal	0	24	<30	4868
NgBox24/21	4101	1329	7209	PIA	2012-04-15	F	North	Other	0	14	<30	4870
NgBox24/22	4101	1330	6876	PIA	2012-04-12	M		Genital	0	23	<30	4715
NgBox24/23	908	110	1407	PIB	2012-04-13	M	South	Genital	0	31	≥30	4000
NgBox24/24	908	110	1407	PIB	2012-04-17	F	South	Genital	0	35	≥30	4073
NgBox24/25	908	110	1407	PIB	2012-04-16	M	South	Genital	0	22	<30	4059
NgBox24/26	4148	29	6946	PIB	2012-04-12	M	South	Oropharangeal	0	20	<30	4000
NgBox24/27	4104	1334	6886	PIA	2012-04-17	F	North	Genital	0	20	<30	4870
NgBox24/28	4101	1330	6876	PIA	2012-04-17	M	North	Genital	0	19	<30	4870
NgBox24/29	4101	1330	6876	PIA	2012-04-17	F	North	Genital	0	23	<30	4871
NgBox24/30	4313	1329	7808	PIA	2012-04-19	M	North	Genital	0	17	<30	4871
NgBox24/31	4101	349	7705	PIA	2012-04-17	M	North	Genital	0	22	<30	4816
NgBox24/32	1808	29	2992	PIB	2012-04-16	M	South	Anorectal	0	16	<30	4000
NgBox24/33	4101	1330	6876	PIA	2012-04-16	M	North	Genital	0	24	<30	4890
NgBox24/34	4101	1330	6876	PIA	2012-04-16	M	North	Genital	0	31	≥30	4870
NgBox24/35	785	60	3611	PIB	2012-04-24	M	South	Genital	0	27	<30	4034
NgBox24/36	1808	29	2992	PIB	2012-04-20	M	South	Oropharangeal	0	26	<30	4000
NgBox24/37	4104	1329	6937	PIA	2012-04-16	F	North	Genital	0	55	≥30	4810
NgBox24/38	4101	1344	7812	PIA	2012-04-19	F		Genital	0	18	<30	4713
NgBox24/39	14	33	21	PIB	2012-04-20	M		Oropharangeal	0	24	<30	4700
NgBox24/40	1808	29	2992	PIB	2012-04-24	M	South	Genital	0	22	<30	4000
NgBox24/41	4101	1330	6876	PIA	2012-04-23	F	South	Genital	0	8	<30	4405
NgBox24/42	14	33	21	PIB	2012-04-18	M	South	Genital	0	23	<30	4010
NgBox24/43	4104	1334	6886	PIA	2012-04-24	F	North	Genital	0	15	<30	4870
NgBox24/44	2280	1329	6863	PIB	2012-04-23	F	North	Genital	0	21	<30	4811
NgBox24/45	4101	1330	6876	PIA	2012-04-23	F	North	Genital	0	17	<30	4816
NgBox24/46	30	743	3307	PIB	2012-04-27	M	South	Genital	0	37	≥30	4217
NgBox24/47	4780	70	8019	PIB	2012-04-28	M	South	Genital	0	30	≥30	4209
NgBox24/48	4313	1329	7808	PIA	2012-04-26	M	North	Genital	0	18	<30	4871
NgBox24/49	1808	29	2992	PIB	2012-04-27	M	South	Genital	0	54	≥30	4215
NgBox24/52	4781	918	8020	PIB	2012-04-26	M		Genital	0	24	<30	O/S
NgBox24/53	4146	1344	6943	PIB	2012-04-23	M		Genital	0	25	<30	4700
NgBox24/54	4668	33	7763	PIB	2012-04-30	M	South	Genital	0	18	<30	4074
NgBox24/55	30	743	3307	PIB	2012-05-03	M	South	Oropharangeal	0	21	<30	4215
NgBox24/56	2569	241	4186	PIB	2012-05-01	F	South	Anorectal	0	25	<30	4215
NgBox24/57	4394	1330	7343	PIB	2012-04-26	M	North	Genital	0	16	<30	4811
NgBox24/58	1445	738	3284	PIB	2012-04-27	F	South	Genital	0	20	<30	4109
NgBox24/59	90	29	758	PIA	2012-05-01	M	South	Genital	0	26	<30	4000
NgBox24/60	4689	1330	8021	PIA	2012-05-01	F	North	Genital	0	20	<30	4869
NgBox24/61	4782	1481	8022	PIB	2012-05-03	M	North	Genital	0	26	<30	4825
NgBox24/63	4656	1334	8003	PIB	2012-05-09	M	South	Genital	0	52	≥30	4106
NgBox24/64	1808	29	2992	PIB	2012-05-10	M	South	Genital	0	47	≥30	4051
NgBox24/65	912	263	8024	PIB	2012-05-12	F	South	Genital	0	25	<30	4030
NgBox24/67	14	33	21	PIB	2012-05-08	M	South	Genital	0	29	<30	4000
NgBox24/68	4101	1334	6939	PIA	2012-05-08	M	North	Genital	0	18	<30	4875
NgBox24/69	4783	33	8025	PIB	2012-05-11	M	South	Anorectal	0	26	<30	4000
NgBox24/70	4689	1330	8021	PIA	2012-05-11	M	North	Genital	0	20	<30	4870
NgBox24/71	262	1332	6880	PIB	2012-05-14	M	South	Genital	0	33	≥30	4215
NgBox24/72	2569	241	4186	PIB	2012-05-10	F	South	Genital	0	28	<30	4122
NgBox24/73	908	110	1407	PIB	2012-05-14	M	South	Genital	0	36	≥30	4000
NgBox24/74	912	263	8024	PIB	2012-05-20	M	South	Genital	0	30	≥30	4221
NgBox24/75	912	263	8024	PIB	2012-05-14	F	South	Genital	0	27	<30	4218
NgBox24/76	1808	29	2992	PIB	2012-05-14	M	South	Genital	0	33	≥30	4566
NgBox24/77	4104	1329	6937	PIA	2012-05-16	F	North	Genital	0	21	<30	4871
NgBox24/78	407	1343	6938	PIA	2012-05-11	M	North	Genital	0	22	<30	4875
NgBox24/79	4101	1284	7336	PIA	2012-05-22	F	South	Genital	0	24	<30	4211
NgBox24/80	402	884	8026	PIA	2012-05-17	M	South	Genital	0	38	≥30	4000
NgBox24/81	4099	349	6879	PIB	2012-05-09	M	North	Genital	0	37	≥30	4810
NgBox25/01	4099	349	6879	PIB	2012-05-11	M	North	Genital	0	42	≥30	4814
NgBox25/02	147	1329	7665	PIA	2012-05-17	M	North	Genital	0	19	<30	4825
NgBox25/03	488	953	5060	PIB	2012-05-15	M	South	Anorectal	0	50	≥30	4118
NgBox25/04	908	110	1407	PIB	2012-05-28	M		Genital	0	28	<30	4670
NgBox25/05	2569	241	4186	PIB	2012-05-28	F		Genital	0	57	≥30	2460
NgBox25/06	4784	66	8027	PIB	2012-05-22	M	South	Genital	0	46	≥30	4017
NgBox25/07	4149	1329	6949	PIB	2012-05-20	F	North	Genital	0	19	<30	4800
NgBox25/09	4446	29	7415	PIB	2012-05-21	M	South	Genital	0	52	≥30	4211
NgBox25/10	301	29	359	PIB	2012-05-23	M	North	Anorectal	0	27	<30	4879
NgBox25/11	4785	21	8028	PIB	2012-05-24	F	South	Genital	0	28	<30	4059
NgBox25/12	1808	29	2992	PIB	2012-05-26	M	South	Genital	0	27	<30	4165
NgBox25/13	4101	1330	6876	PIA	2012-05-22	M	North	Genital	0	32	≥30	4870
NgBox25/14	4101	1330	6876	PIA	2012-05-23	F	North	Genital	0	14	<30	4878
NgBox25/15	4099	349	6879	PIB	2012-05-30	M	South	Genital	0	33	≥30	4133
NgBox25/16	4148	29	6946	PIB	2012-05-23	M	South	Anorectal	0	18	<30	4000
NgBox25/17	4099	349	6879	PIB	2012-06-04	F	South	Genital	0	28	<30	4000
NgBox25/18	1808	29	2992	PIB	2012-05-31	M	South	Genital	0	22	<30	4000
NgBox25/19	908	110	1407	PIB	2012-05-28	M	South	Genital	0	25	<30	4000
NgBox25/21	2569	241	4186	PIB	2012-05-29	F	South	Oropharangeal	0	31	≥30	4000
NgBox25/22	4104	1329	6937	PIA	2012-05-30	F	North	Invasive	1	34	≥30	4890
NgBox25/23	4443	349	7413	PIB	2012-06-06	M	South	Genital	0	32	≥30	4127
NgBox25/24	4101	349	7705	PIA	2012-05-30	F	North	Genital	0	25	<30	4814
NgBox25/25	4443	349	7413	PIB	2012-05-30	F	South	Genital	0	18	<30	4285
NgBox25/27	4148	29	6946	PIB	2012-06-01	M	South	Genital	0	22	<30	4000
NgBox25/28	4689	1330	8021	PIA	2012-06-01	F	North	Genital	0	24	<30	4870
NgBox25/29	2569	241	4186	PIB	2012-06-07	F	South	Genital	0	25	<30	4169
NgBox25/30	1389	29	8053	PIB	2012-06-07	M	South	Genital	0	24	<30	4035
NgBox25/31	2923	1486	8054	PIB	2012-05-25	M	South	Genital	0	44	≥30	4000
NgBox25/32	4802	1334	8055	PIA	2012-05-31	M	North	Genital	0	25	<30	4876
NgBox25/33	4802	1334	8055	PIA	2012-05-31	F	North	Genital	0	23	<30	4876
NgBox25/34	4148	29	6946	PIB	2012-05-31	M	South	Oropharangeal	0	21	<30	4000
NgBox25/35	14	33	21	PIB	2012-06-04	M	South	Anorectal	0	21	<30	4215
NgBox25/36	2569	241	4186	PIB	2012-06-05	M	South	Oropharangeal	0	31	≥30	4215
NgBox25/37	2569	241	4186	PIB	2012-06-05	F	South	Genital	0	24	<30	4215
NgBox25/40	90	1044	4990	PIA	2012-06-05	M	South	Genital	0	57	≥30	4000
NgBox25/41	4803	29	8056	PIB	2012-06-07	M	South	Genital	0	20	<30	4000
NgBox25/42	8	5	12	PIB	2012-06-05	F	North	Genital	0	22	<30	4875
NgBox25/43	4101	349	7705	PIA	2012-06-09	M	North	Genital	0	20	<30	4812
NgBox25/44	407	1487	8057	PIA	2012-06-06	M	North	Genital	0	24	<30	4825
NgBox25/46	904	349	1415	PIB	2012-06-05	M	North	Genital	0	39	≥30	4825
NgBox25/47	90	884	8058	PIA	2012-06-08	M	South	Genital	0	76	≥30	4000
NgBox25/49	4104	1334	6886	PIA	2012-06-06	M	North	Genital	0	19	<30	4807
NgBox25/50	301	29	359	PIB	2012-06-05	M	South	Genital	0	19	<30	4560
NgBox25/51	227	26	190	PIB	2012-06-12	F	South	Genital	0	22	<30	4051
NgBox25/53	1808	29	2992	PIB	2012-06-18	M	South	Genital	0	30	≥30	4032
NgBox25/54	4804	33	8059	PIB	2012-06-18	F	South	Genital	0	18	<30	4077
NgBox25/55	4104	1334	6886	PIA	2012-06-14	M	North	Genital	0	27	<30	4870
NgBox25/56	4101	1330	6876	PIA	2012-06-14	M	North	Genital	0	16	<30	4875
NgBox25/58	407	1343	6938	PIA	2012-06-15	M	North	Other	0	19	<30	4883
NgBox25/59	4146	1344	6943	PIB	2012-06-12	M		Genital	0	25	<30	2481
NgBox25/61	407	1466	7796	PIA	2012-06-12	M		Genital	0	60	≥30	O/S
NgBox25/62	3669	110	6200	PIB	2012-06-18	M	South	Genital	0	22	<30	4011
NgBox25/63	1808	29	2992	PIB	2012-06-12	M	South	Genital	0	34	≥30	4311
NgBox25/64	4143	29	6940	PIB	2012-06-14	M		Genital	0	62	≥30	4740
NgBox25/65	4104	1329	6937	PIA	2012-06-15	F	North	Genital	0	30	≥30	4810
NgBox25/68	4687	2	7797	PIB	2012-06-13	M	South	Genital	0	34	≥30	4000
NgBox25/69	4099	349	6879	PIB	2012-06-18	M		Genital	0	25	<30	4702
NgBox25/70	90	1044	4990	PIA	2012-06-22	M	South	Genital	0	52	≥30	4030
NgBox25/71	4099	349	6879	PIB	2012-06-20	F	South	Genital	0	24	<30	4559
NgBox25/72	4688	98	7798	PIB	2012-06-21	M	North	Genital	0	25	<30	4812
NgBox25/73	14	33	21	PIB	2012-06-21	F	South	Oropharangeal	0	20	<30	4000
NgBox25/74	4104	1329	6937	PIA	2012-06-19	M	North	Genital	0	31	≥30	4876
NgBox25/75	4443	349	7413	PIB	2012-06-25	M	South	Genital	0	22	<30	4211
NgBox25/76	543	110	1405	PIB	2012-06-27	M	South	Genital	0	75	≥30	4352
NgBox25/77	18	27	25	PIB	2012-06-22	F	North	Genital	0	19	<30	4877
NgBox25/79	4112	1460	7799	PIA	2012-06-29	M	South	Genital	0	29	<30	4221
NgBox25/80	4099	349	6879	PIB	2012-06-25	M		Genital	0	45	≥30	4715
NgBox25/81	61	1467	7800	PIB	2012-06-25	M	South	Genital	0	31	≥30	4211
NgBox26/01	4101	349	7705	PIA	2012-06-25	M	North	Genital	0	28	<30	4814
NgBox26/03	4689	1329	7801	PIA	2012-06-25	F	North	Genital	0	39	≥30	4870
NgBox26/04	4146	1344	6943	PIB	2012-06-20	F	North	Genital	0	19	<30	4875
NgBox26/05	4101	1330	6876	PIA	2012-06-26	F	North	Genital	0	12	<30	4878
NgBox26/06	316	27	7419	PIB	2012-06-28	M	South	Genital	0	42	≥30	4078
NgBox26/07	4101	349	7705	PIA	2012-06-27	F	North	Genital	0	17	<30	4810
NgBox26/08	4099	349	6879	PIB	2012-06-26	M	North	Genital	0	20	<30	4816
NgBox26/10	4101	1330	6876	PIA	2012-06-26	F	North	Genital	0	17	<30	4876
NgBox26/11	4443	349	7413	PIB	2012-06-26	F	South	Genital	0	23	<30	4160
NgBox26/12	997	1468	7802	PIB	2012-07-02	M	South	Genital	0	54	≥30	4006
NgBox26/13	161	349	7803	PIA	2012-07-03	M	South	Genital	0	21	<30	4068
NgBox26/14	1294	137	7804	PIB	2012-06-29	M	South	Genital	0	30	≥30	4000
NgBox26/15	4784	66	8027	PIB	2012-07-02	M	South	Genital	0	46	≥30	4017
NgBox26/16	289	19	7210	PIB	2012-07-06	M	South	Genital	0	26	<30	4032
NgBox26/17	4148	29	6946	PIB	2012-07-07	M	South	Anorectal	0	31	≥30	4067
NgBox26/18	4099	349	6879	PIB	2012-07-06	M	South	Genital	0	15	<30	4350
NgBox26/19	263	26	384	PIB	2012-07-05	M	North	Genital	0	24	<30	4814
NgBox26/20	263	26	384	PIB	2012-07-05	F	North	Genital	0	38	≥30	4883
NgBox26/21	4104	1329	6937	PIA	2012-07-05	F	North	Genital	0	14	<30	4865
NgBox26/22	4149	1329	6949	PIB	2012-07-02	F		Genital	0	17	<30	4740
NgBox26/23	4101	1329	7209	PIA	2012-07-03	M	North	Genital	0	50	≥30	4816
NgBox26/24	4149	1329	6949	PIB	2012-07-03	M		Genital	0	19	<30	4740
NgBox26/25	4035	10	7806	PIB	2012-07-06	F	North	Genital	0	27	<30	4881
NgBox26/26	316	27	7419	PIB	2012-07-02	F	South	Genital	0	39	≥30	4304
NgBox26/27	402	33	5785	PIA	2012-07-10	M	South	Genital	0	23	<30	4000
NgBox26/28	4143	29	6940	PIB	2012-07-11	M	South	Genital	0	36	≥30	4051
NgBox26/29	147	1469	7807	PIA	2012-07-11	F	North	Genital	0	27	<30	4870
NgBox26/30	4099	349	6879	PIB	2012-07-13	M		Genital	0	24	<30	4700
NgBox26/31	301	29	359	PIB	2012-07-12	M	South	Genital	0	50	≥30	4217
NgBox26/32	4099	349	6879	PIB	2012-07-11	F		Other	0	14	<30	4721
NgBox26/34	4148	29	6946	PIB	2012-07-14	M	South	Anorectal	0	21	<30	4153
NgBox26/35	4443	349	7413	PIB	2012-07-11	F	South	Genital	0	34	≥30	4132
NgBox26/36	4313	1329	7808	PIA	2012-07-13	F	North	Genital	0	22	<30	4868
NgBox26/37	90	1044	4990	PIA	2012-07-18	M	South	Anorectal	0	41	≥30	4068
NgBox26/38	4690	241	7809	PIB	2012-07-16	F		Genital	0	34	≥30	2173
NgBox26/39	14	33	21	PIB	2012-07-18	M	South	Genital	0	22	<30	4000
NgBox26/40	279	25	5993	PIB	2012-07-17	M	South	Genital	0	34	≥30	4305
NgBox26/41	4446	29	7415	PIB	2012-07-17	M	South	Genital	0	62	≥30	4300
NgBox26/42	4691	29	7810	PIB	2012-07-18	M	South	Genital	0	33	≥30	4103
NgBox26/43	4101	1330	6876	PIA	2012-07-17	M		Genital	0	17	<30	2477
NgBox26/44	4146	1344	6943	PIB	2012-07-16	F		Genital	0	16	<30	4700
NgBox26/45	1808	29	2992	PIB	2012-07-16	M	South	Oropharangeal	0	29	<30	4000
NgBox26/46	4101	1330	6876	PIA	2012-07-16	M	North	Genital	0	18	<30	4868
NgBox26/47	4313	1329	7808	PIA	2012-07-18	M	North	Genital	0	14	<30	4807
NgBox26/49	463	27	697	PIB	2012-07-16	F	South	Genital	0	21	<30	4114
NgBox26/50	4143	29	6940	PIB	2012-07-20	M	South	Genital	0	25	<30	4000
NgBox26/51	14	33	21	PIB	2012-07-20	M	South	Anorectal	0	53	≥30	4000
NgBox26/52	4101	1344	7812	PIA	2012-07-20	F	North	Genital	0	16	<30	4814
NgBox26/53	4394	1330	7343	PIB	2012-07-16	F	North	Genital	0	17	<30	4816
NgBox26/54	4101	349	7705	PIA	2012-07-08	F	North	Genital	0	23	<30	4814
NgBox26/55	1489	563	2400	PIB	2012-07-23	M	South	Genital	0	49	≥30	4217
NgBox26/56	4692	29	7811	PIB	2012-07-09	M	South	Anorectal	0	26	<30	4000
NgBox26/57	14	33	21	PIB	2012-07-15	M		Genital	0	25	<30	2450
NgBox26/58	4101	1330	6876	PIA	2012-07-23	M	North	Genital	0	18	<30	4890
NgBox26/59	4146	1344	6943	PIB	2012-07-23	M	North	Genital	0	40	≥30	4888
NgBox26/60	4101	1330	6876	PIA	2012-07-24	M		Other	0	21	<30	4720
NgBox26/61	193	27	6898	PIB	2012-07-25	F	South	Genital	0	16	<30	4054
NgBox26/62	4693	61	7813	PIB	2012-07-25	F	South	Genital	0	22	<30	4132
NgBox26/63	4099	349	6879	PIB	2012-07-24	F	South	Genital	0	20	<30	4350
NgBox26/64	14	33	21	PIB	2012-07-26	M	South	Genital	0	21	<30	4215
NgBox26/65	14	33	21	PIB	2012-07-23	M	South	Genital	0	22	<30	4000
NgBox26/66	90	953	5624	PIA	2012-07-26	M	South	Genital	0	33	≥30	4160
NgBox26/67	227	26	190	PIB	2012-07-20	F	South	Genital	0	43	≥30	4221
NgBox26/68	4146	1344	6943	PIB	2012-07-27	F		Genital	0	18	<30	4701
NgBox26/69	4392	1440	7814	PIB	2012-07-26	M	North	Genital	0	18	<30	4875
NgBox26/70	4150	1341	6950	PIA	2012-07-29	F	South	Genital	0	17	<30	4220
NgBox26/71	4281	1375	7161	PIB	2012-07-30	M	South	Genital	0	43	≥30	4218
NgBox26/72	1808	29	2992	PIB	2012-07-27	M	North	Anorectal	0	31	≥30	4878
NgBox26/73	1808	29	2992	PIB	2012-08-01	M	South	Genital	0	32	≥30	4506
NgBox26/74	4101	1334	6939	PIA	2012-07-30	F	North	Genital	0	14	<30	4875
NgBox26/75	4104	1329	6937	PIA	2012-07-31	F	North	Invasive	1	34	≥30	4870
NgBox26/76	4099	349	6879	PIB	2012-08-02	F	North	Genital	0	22	<30	4870
NgBox26/77	4146	1344	6943	PIB	2012-08-02	F	North	Genital	0	21	<30	4870
NgBox26/78	14	33	21	PIB	2012-08-01	M	South	Genital	0	22	<30	4000
NgBox26/79	96	1464	7779	PIA	2012-08-02	M	North	Genital	0	26	<30	4875
NgBox26/80	4101	1330	6876	PIA	2012-08-05	M	North	Genital	0	57	≥30	4810
NgBox26/81	1483	33	2387	PIB	2012-08-09	M	North	Genital	0	39	≥30	4811
NgBox27/01	1808	29	2992	PIB	2012-08-06	M	South	Genital	0	26	<30	4000
NgBox27/02	4101	1330	6876	PIA	2012-08-10	M	North	Genital	0	30	≥30	4880
NgBox27/03	4099	349	6879	PIB	2012-08-06	M	South	Genital	0	19	<30	4350
NgBox27/04	4099	349	6879	PIB	2012-08-09	M	South	Other	0	27	<30	4304
NgBox27/05	4099	349	6879	PIB	2012-08-06	M	South	Genital	0	33	≥30	4350
NgBox27/06	4104	1329	6937	PIA	2012-08-08	M	North	Eye	0	2	<30	4870
NgBox27/07	4099	349	6879	PIB	2012-08-06	M		Genital	0	20	<30	4670
NgBox27/08	4394	1330	7343	PIB	2012-08-07	F	North	Genital	0	22	<30	4816
NgBox27/09	4099	349	6879	PIB	2012-08-07	M	North	Genital	0	23	<30	4870
NgBox27/10	85	39	7780	PIA	2012-08-13	F	South	Genital	0	61	≥30	4053
NgBox27/11	4674	24	7781	PIB	2012-08-13	M	North	Anorectal	0	63	≥30	4814
NgBox27/12	1903	29	4822	PIB	2012-08-14	M	South	Oropharangeal	0	50	≥30	4000
NgBox27/13	301	29	359	PIB	2012-08-10	F	South	Genital	0	36	≥30	4000
NgBox27/15	4099	349	6879	PIB	2012-08-15	M	North	Genital	0	48	≥30	4870
NgBox27/16	1808	29	2992	PIB	2012-08-14	M	South	Genital	0	47	≥30	4557
NgBox27/17	4146	1344	6943	PIB	2012-08-15	F		Genital	0	24	<30	4700
NgBox27/18	193	27	6898	PIB	2012-08-13	M	South	Eye	0	0	<30	4300
NgBox27/19	4146	1344	6943	PIB	2012-08-15	M	North	Genital	0	18	<30	4873
NgBox27/20	4	4	225	PIB	2012-08-16	F	South	Genital	0	24	<30	4215
NgBox27/21	4099	349	6879	PIB	2012-08-17	M	South	Genital	0	20	<30	4352
NgBox27/22	14	33	21	PIB	2012-08-16	M	South	Oropharangeal	0	47	≥30	4061
NgBox27/23	54	149	7782	PIB	2012-08-17	F		Genital	0	22	<30	2464
NgBox27/24	4675	137	7783	PIB	2012-08-20	F	South	Genital	0	61	≥30	4217
NgBox27/25	14	33	21	PIB	2012-08-21	M	South	Oropharangeal	0	26	<30	4000
NgBox27/26	4101	1330	6876	PIA	2012-08-21	F	North	Genital	0	19	<30	4870
NgBox27/27	4104	1329	6937	PIA	2012-08-25	F	North	Genital	0	3	<30	4870
NgBox27/28	4104	1334	6886	PIA	2012-07-02	M	North	Genital	0	20	<30	4870
NgBox27/29	4676	33	7784	PIB	2012-08-24	M	South	Genital	0	24	<30	4035
NgBox27/30	1808	29	2992	PIB	2012-08-22	M	South	Anorectal	0	28	<30	4000
NgBox27/31	3361	29	5553	PIB	2012-08-22	F	South	Genital	0	20	<30	4207
NgBox27/32	4578	29	7616	PIB	2012-08-24	M	South	Genital	0	24	<30	4120
NgBox27/33	4099	349	6879	PIB	2012-08-24	F		Genital	0	28	<30	4701
NgBox27/34	4443	349	7413	PIB	2012-08-25	M	South	Genital	0	19	<30	4214
NgBox27/35	4677	60	7785	PIB	2012-08-23	M	North	Genital	0	62	≥30	4805
NgBox27/36	4678	33	7786	PIB	2012-08-28	F	South	Genital	0	20	<30	4000
NgBox27/37	2569	241	4186	PIB	2012-08-28	F		Genital	0	22	<30	2452
NgBox27/38	4446	29	7415	PIB	2012-08-28	M	South	Anorectal	0	25	<30	4075
NgBox27/39	4099	349	6879	PIB	2012-08-28	M		Genital	0	24	<30	4740
NgBox27/40	697	295	1100	PIA	2012-08-29	F	South	Genital	0	38	≥30	4557
NgBox27/41	1808	29	2992	PIB	2012-08-30	M	South	Genital	0	37	≥30	4064
NgBox27/42	4675	137	7783	PIB	2012-09-04	M		Other	0	25	<30	4745
NgBox27/43	1808	29	2992	PIB	2012-09-05	M	South	Anorectal	0	33	≥30	4215
NgBox27/44	2569	241	4186	PIB	2012-08-31	F	South	Genital	0	24	<30	4171
NgBox27/45	103	21	772	PIA	2012-08-28	M	South	Invasive	1	18	<30	4508
NgBox27/46	4143	29	6940	PIB	2012-08-31	M	South	Genital	0	25	<30	4000
NgBox27/47	908	110	1407	PIB	2012-09-03	M	South	Genital	0	30	≥30	4000
NgBox27/49	1808	29	2992	PIB	2012-09-03	M	South	Genital	0	42	≥30	4122
NgBox27/50	14	33	21	PIB	2012-09-03	M	South	Genital	0	56	≥30	4300
NgBox27/51	14	33	21	PIB	2012-09-07	M	South	Genital	0	32	≥30	4305
NgBox27/52	1808	29	2992	PIB	2012-09-07	M	South	Genital	0	25	<30	4275
NgBox27/53	908	110	1407	PIB	2012-09-07	M	South	Anorectal	0	30	≥30	4169
NgBox27/54	4805	137	8060	PIA	2012-09-11	M	South	Genital	0	23	<30	4215
NgBox27/55	4101	1329	7209	PIA	2012-09-11	M	North	Genital	0	16	<30	4865
NgBox27/56	4101	1330	6876	PIA	2012-09-10	F	North	Genital	0	17	<30	4870
NgBox27/57	1808	29	2992	PIB	2012-09-10	M	South	Genital	0	37	≥30	4000
NgBox27/58	14	33	21	PIB	2012-09-12	M	South	Anorectal	0	32	≥30	4128
NgBox27/59	4394	1330	7343	PIB	2012-09-09	M	North	Genital	0	17	<30	4811
NgBox27/60	4443	349	7413	PIB	2012-09-14	F		Genital	0	17	<30	4714
NgBox27/61	1808	29	2992	PIB	2012-09-14	M	North	Genital	0	33	≥30	4810
NgBox27/63	14	33	21	PIB	2012-09-11	M	South	Oropharangeal	0	22	<30	4350
NgBox27/64	908	110	1407	PIB	2012-09-18	M	South	Genital	0	29	<30	4000
NgBox27/65	4101	1330	6876	PIA	2012-09-14	F	North	Genital	0	19	<30	4895
NgBox27/66	4104	1329	6937	PIA	2012-09-17	F	North	Genital	0	17	<30	4868
NgBox27/67	4101	1329	7209	PIA	2012-09-17	F	North	Genital	0	14	<30	4870
NgBox27/68	4806	29	8061	PIB	2012-09-20	M	South	Anorectal	0	34	≥30	4215
NgBox27/69	4785	21	8028	PIB	2012-09-21	F	South	Genital	0	0	<30	4014
NgBox27/70	3361	29	5553	PIB	2012-09-21	M	South	Anorectal	0	26	<30	4030
NgBox27/71	2078	110	3431	PIB	2012-09-22	F	South	Genital	0	30	≥30	4064
NgBox27/72	251	136	368	PIA	2012-09-21	M	South	Genital	0	25	<30	4000
NgBox27/73	90	1106	5225	PIA	2012-09-25	M	South	Genital	0	32	≥30	4215
NgBox27/74	4807	1178	8062	PIA	2012-09-25	M	South	Genital	0	33	≥30	4215
NgBox27/75	4394	1330	7343	PIB	2012-09-26	F	North	Genital	0	29	<30	4825
NgBox27/76	4099	349	6879	PIB	2012-09-27	M	North	Genital	0	17	<30	4825
NgBox27/77	147	29	8063	PIA	2012-09-24	F	North	Genital	0	23	<30	4880
NgBox27/78	4099	349	6879	PIB	2012-09-25	M		Genital	0	22	<30	2409
NgBox27/79	4104	1329	6937	PIA	2012-09-27	F	North	Genital	0	22	<30	4880
NgBox27/80	4101	1330	6876	PIA	2012-09-28	F	South	Other	0	13	<30	4340
NgBox27/81	14	33	21	PIB	2012-09-25	M	South	Genital	0	30	≥30	4123
NgBox28/01	3361	29	5553	PIB	2012-09-29	F	South	Genital	0	17	<30	4115
NgBox28/02	1808	29	2992	PIB	2012-10-02	M	South	Genital	0	42	≥30	4122
NgBox28/03	14	33	21	PIB	2012-10-04	M	South	Genital	0	23	<30	4006
NgBox28/04	4908	1175	8182	PIB	2012-10-04	M	South	Genital	0	40	≥30	4014
NgBox28/05	14	33	21	PIB	2012-10-04	M	South	Genital	0	36	≥30	4301
NgBox28/06	4536	349	8183	PIB	2012-10-03	M	South	Genital	0	29	<30	4500
NgBox28/07	4150	21	8184	PIA	2012-10-02	M	South	Genital	0	47	≥30	4115
NgBox28/08	4909	1507	8185	PIB	2012-10-02	M	South	Genital	0	37	≥30	4000
NgBox28/09	908	110	1407	PIB	2012-10-02	M	South	Anorectal	0	33	≥30	4000
NgBox28/10	4101	1330	6876	PIA	2012-10-03	M	North	Genital	0	26	<30	4870
NgBox28/11	1808	29	2992	PIB	2012-10-05	M	South	Genital	0	33	≥30	4556
NgBox28/12	4099	349	6879	PIB	2012-08-29	M		Genital	0	20	<30	4700
NgBox28/13	407	1343	6938	PIA	2012-09-15	M	North	Genital	0	18	<30	4871
NgBox28/14	4910	1329	8186	PIB	2012-09-17	M	North	Genital	0	17	<30	4825
NgBox28/15	4911	267	8187	PIB	2012-10-04	F	South	Genital	0	22	<30	4160
NgBox28/16	4443	349	7413	PIB	2012-10-05	F	South	Genital	0	39	≥30	4118
NgBox28/17	4101	1330	6876	PIA	2012-10-05	M	South	Genital	0	24	<30	4000
NgBox28/18	4104	1329	6937	PIA	2012-10-02	M	North	Genital	0	24	<30	4876
NgBox28/19	4099	349	6879	PIB	2012-10-06	F	North	Genital	0	16	<30	4825
NgBox28/20	4101	1330	6876	PIA	2012-10-08	F	South	Genital	0	27	<30	4054
NgBox28/21	908	110	1407	PIB	2012-10-10	M	South	Genital	0	41	≥30	4000
NgBox28/22	4101	1330	6876	PIA	2012-10-09	M	North	Genital	0	18	<30	4869
NgBox28/23	1489	563	2400	PIB	2012-10-10	M	South	Genital	0	19	<30	4215
NgBox28/24	4918	110	8194	PIB	2012-10-12	M	South	Anorectal	0	30	≥30	4215
NgBox28/25	4911	267	8187	PIB	2012-10-12	M	South	Genital	0	21	<30	4132
NgBox28/26	5083	1439	8570	PIB	2012-10-15	F	South	Genital	0	19	<30	4012
NgBox28/27	2656	29	7353	PIB	2012-10-15	M	South	Genital	0	19	<30	4000
NgBox28/28	4101	1509	8195	PIA	2012-10-12	F	North	Genital	0	12	<30	4816
NgBox28/29	14	33	21	PIB	2012-10-15	M	South	Oropharangeal	0	26	<30	4101
NgBox28/30	3361	29	5553	PIB	2012-10-16	M	South	Anorectal	0	31	≥30	4005
NgBox28/31	4101	1344	7812	PIA	2012-10-16	M		Genital	0	16	<30	4701
NgBox28/32	407	1343	6938	PIA	2012-10-12	F	South	Genital	0	18	<30	4114
NgBox28/33	4099	349	6879	PIB	2012-10-16	M	North	Genital	0	20	<30	4868
NgBox28/34	4101	349	7705	PIA	2012-10-17	M	North	Genital	0	39	≥30	4810
NgBox28/35	3605	1161	6060	PIB	2012-10-16	F	South	Genital	0	37	≥30	4019
NgBox28/36	4099	349	6879	PIB	2012-10-19	M		Genital	0	21	<30	4700
NgBox28/37	4101	1344	7812	PIA	2012-10-19	F		Other	0	29	<30	4701
NgBox28/38	904	349	1415	PIB	2012-10-16	F	North	Genital	0	42	≥30	4816
NgBox28/39	4919	25	8196	PIB	2012-10-14	M	North	Genital	0	64	≥30	4885
NgBox28/40	4443	349	7413	PIB	2012-10-18	F	South	Genital	0	41	≥30	4305
NgBox28/41	4104	1329	6937	PIA	2012-10-17	M	North	Genital	0	25	<30	4878
NgBox28/42	4146	1344	6943	PIB	2012-10-18	F	North	Genital	0	17	<30	4870
NgBox28/43	96	1488	8068	PIA	2012-10-18	F	North	Genital	0	24	<30	4814
NgBox28/44	1808	29	2992	PIB	2012-10-22	M	South	Genital	0	33	≥30	4215
NgBox28/45	4394	1330	7343	PIB	2012-10-17	M	North	Genital	0	15	<30	4812
NgBox28/46	4099	349	6879	PIB	2012-10-15	M	North	Genital	0	18	<30	4825
NgBox28/47	14	33	21	PIB	2012-10-17	M	South	Anorectal	0	27	<30	4000
NgBox28/50	4104	1329	6937	PIA	2012-10-22	F	North	Invasive	1	15	<30	4869
NgBox28/51	1489	563	2400	PIB	2012-10-17	M	South	Anorectal	0	43	≥30	4000
NgBox28/52	1489	563	2400	PIB	2012-10-17	M	South	Oropharangeal	0	37	≥30	4000
NgBox28/53	4104	1329	6937	PIA	2012-10-22	M	North	Genital	0	18	<30	4871
NgBox28/54	908	110	1407	PIB	2012-10-25	M	South	Anorectal	0	37	≥30	4006
NgBox28/55	4920	129	8197	PIB	2012-10-26	M		Genital	0	40	≥30	2485
NgBox28/56	3361	29	5553	PIB	2012-10-23	M	South	Genital	0	23	<30	4132
NgBox28/57	4762	137	7989	PIB	2012-10-22	M	South	Genital	0	22	<30	4000
NgBox28/58	316	27	7419	PIB	2012-10-22	M	South	Genital	0	22	<30	4000
NgBox28/59	316	27	7419	PIB	2012-10-26	M	South	Genital	0	23	<30	4032
NgBox28/60	90	110	334	PIA	2012-10-24	M	North	Genital	0	57	≥30	4870
NgBox28/61	4099	349	6879	PIB	2012-10-26	M		Genital	0	27	<30	4700
NgBox28/62	3402	29	8571	PIA	2012-10-28	M	South	Genital	0	22	<30	4059
NgBox28/64	4101	1344	7812	PIA	2012-10-22	M		Other	0	21	<30	4713
NgBox28/65	904	349	1415	PIB	2012-10-24	F	North	Genital	0	31	≥30	4816
NgBox28/66	908	110	1407	PIB	2012-10-25	M	South	Oropharangeal	0	26	<30	4000
NgBox28/67	158	4	217	PIB	2012-10-28	F	North	Genital	0	20	<30	4825
NgBox28/68	1903	29	4822	PIB	2012-10-30	M	South	Oropharangeal	0	42	≥30	4215
NgBox28/69	997	1468	7802	PIB	2012-10-30	M	South	Anorectal	0	22	<30	4113
NgBox28/70	4	4	225	PIB	2012-10-30	F	South	Genital	0	20	<30	4131
NgBox28/71	4099	349	6879	PIB	2012-11-01	M	South	Genital	0	31	≥30	4017
NgBox28/72	3711	4	6301	PIB	2012-10-31	M	South	Genital	0	22	<30	4013
NgBox28/73	4394	1330	7343	PIB	2012-10-30	F	North	Genital	0	17	<30	4825
NgBox28/75	4101	1344	7812	PIA	2012-11-02	M		Genital	0	16	<30	4701
NgBox28/76	4104	1329	6937	PIA	2012-11-01	F	North	Genital	0	17	<30	4875
NgBox28/77	4104	1329	6937	PIA	2012-11-03	F	North	Genital	0	17	<30	4870
NgBox28/78	1808	29	2992	PIB	2012-11-05	M	South	Anorectal	0	37	≥30	4030
NgBox28/79	847	29	1313	PIB	2012-11-06	M	South	Genital	0	18	<30	4133
NgBox28/80	1808	29	2992	PIB	2012-11-07	M	South	Anorectal	0	22	<30	4000
NgBox28/81	1808	29	2992	PIB	2012-11-05	M	South	Genital	0	25	<30	4000
NgBox29/01	4921	1510	8198	PIA	2012-11-05	M	South	Genital	0	46	≥30	4000
NgBox29/02	263	26	384	PIB	2012-11-05	M	South	Oropharangeal	0	54	≥30	4000
NgBox29/03	2656	29	7353	PIB	2012-11-08	M	South	Genital	0	20	<30	4000
NgBox29/04	4101	349	7705	PIA	2012-11-01	F	North	Genital	0	19	<30	4812
NgBox29/05	391	33	5267	PIB	2012-11-08	M	South	Genital	0	31	≥30	4215
NgBox29/06	4101	1284	7336	PIA	2012-11-09	M		Genital	0	19	<30	2400
NgBox29/07	4099	349	6879	PIB	2012-11-08	F	North	Genital	0	18	<30	4870
NgBox29/08	4101	1382	7207	PIA	2012-11-15	F	North	Genital	0	21	<30	4871
NgBox29/09	4099	349	6879	PIB	2012-11-15	F	South	Genital	0	18	<30	4207
NgBox29/10	2569	241	4186	PIB	2012-11-15	M	South	Genital	0	42	≥30	4551
NgBox29/11	4922	1511	8199	PIA	2012-11-12	F		Genital	0	27	<30	O/S
NgBox29/12	14	33	21	PIB	2012-11-15	F	South	Genital	0	22	<30	4132
NgBox29/13	2569	241	4186	PIB	2012-11-13	F	South	Genital	0	28	<30	4000
NgBox29/14	1903	29	4822	PIB	2012-11-15	M	South	Anorectal	0	25	<30	4000
NgBox29/15	4099	349	6879	PIB	2012-11-07	M	North	Genital	0	22	<30	4816
NgBox29/16	4394	1330	7343	PIB	2012-11-12	F	North	Genital	0	22	<30	4816
NgBox29/17	4101	1330	6876	PIA	2012-11-16	M	South	Genital	0	18	<30	4118
NgBox29/18	1808	29	2992	PIB	2012-11-16	M	South	Anorectal	0	20	<30	4000
NgBox29/19	96	1178	8065	PIA	2012-11-14	F	North	Genital	0	20	<30	4870
NgBox29/20	1808	29	2992	PIB	2012-11-21	M	South	Anorectal	0	23	<30	4110
NgBox29/21	316	27	7419	PIB	2012-11-16	F	South	Genital	0	31	≥30	4000
NgBox29/22	4099	349	6879	PIB	2012-11-20	M		Genital	0	18	<30	4731
NgBox29/23	723	441	8200	PIB	2012-11-21	M	South	Anorectal	0	20	<30	4230
NgBox29/24	1808	29	2992	PIB	2012-11-21	M	South	Genital	0	53	≥30	4017
NgBox29/25	1840	29	3042	PIA	2012-11-19	M	North	Genital	0	40	≥30	4869
NgBox29/26	14	33	21	PIB	2012-11-20	M	South	Anorectal	0	20	<30	4303
NgBox29/27	1808	29	2992	PIB	2012-11-26	M	South	Genital	0	52	≥30	4215
NgBox29/28	262	1332	6880	PIB	2012-11-22	M	South	Anorectal	0	25	<30	4000
NgBox29/29	4923	1334	8201	PIA	2012-11-19	M	North	Genital	0	23	<30	4875
NgBox29/30	4924	25	8202	PIB	2012-11-19	M	South	Anorectal	0	28	<30	4000
NgBox29/31	1808	29	2992	PIB	2012-11-26	M	South	Oropharangeal	0	61	≥30	4000
NgBox29/32	316	27	7419	PIB	2012-12-01	F	South	Other	0	34	≥30	4208
NgBox29/33	4146	1344	6943	PIB	2012-12-01	M		Genital	0	36	≥30	4702
NgBox29/34	3704	29	6293	PIB	2012-11-26	M	South	Anorectal	0	21	<30	4000
NgBox29/35	1808	29	2992	PIB	2012-11-29	M	South	Anorectal	0	31	≥30	4000
NgBox29/36	5005	1539	8367	PIB	2012-11-29	M	South	Genital	0	36	≥30	4000
NgBox29/37	5006	25	8368	PIB	2012-11-29	M	South	Genital	0	26	<30	4000
NgBox29/38	4394	1330	7343	PIB	2012-11-29	F	North	Genital	0	31	≥30	4825
NgBox29/39	4101	1284	7336	PIA	2012-12-07	M	South	Genital	0	19	<30	4552
NgBox29/40	5007	29	8369	PIB	2012-12-05	M		Genital	0	18	<30	3182
NgBox29/41	4691	29	7810	PIB	2012-12-06	M	South	Genital	0	38	≥30	4006
NgBox29/42	316	27	7419	PIB	2012-12-03	F	South	Genital	0	31	≥30	4217
NgBox29/43	4446	29	7415	PIB	2012-12-07	M	South	Anorectal	0	21	<30	4000
NgBox29/44	997	98	4644	PIB	2012-12-10	F	South	Genital	0	26	<30	4109
NgBox29/45	2298	9	8405	PIB	2012-12-10	F	South	Genital	0	29	<30	4077
NgBox29/46	4446	29	7415	PIB	2012-11-29	M	South	Oropharangeal	0	26	<30	4000
NgBox29/47	2569	241	4186	PIB	2012-12-16	M	North	Genital	0	20	<30	4816
NgBox29/48	14	33	21	PIB	2012-12-11	F	South	Anorectal	0	49	≥30	4118
NgBox29/49	4146	1344	6943	PIB	2012-12-11	M	North	Genital	0	15	<30	4870
NgBox29/50	2569	241	4186	PIB	2012-12-16	M	South	Genital	0	47	≥30	4563
NgBox29/51	14	33	21	PIB	2012-12-13	M	South	Genital	0	27	<30	4000
NgBox29/52	904	1546	8406	PIB	2012-12-11	F	North	Genital	0	21	<30	4810
NgBox29/53	4146	1344	6943	PIB	2012-12-13	M	North	Genital	0	27	<30	4820
NgBox29/54	263	26	384	PIB	2012-12-12	F	South	Other	0	26	<30	4059
NgBox29/55	4802	1334	8055	PIA	2012-12-12	M	North	Genital	0	21	<30	4862
NgBox29/56	908	110	1407	PIB	2012-12-10	M	South	Anorectal	0	27	<30	4000
NgBox29/57	96	1178	8065	PIA	2012-12-13	F	North	Genital	0	38	≥30	4875
NgBox29/58	4919	25	8196	PIB	2012-12-19	M	North	Genital	0	22	<30	4815
NgBox29/59	4101	1547	8407	PIA	2012-12-16	M	North	Genital	0	16	<30	4870
NgBox29/60	316	27	7419	PIB	2012-12-16	M	South	Genital	0	23	<30	4159
NgBox29/61	4446	29	7415	PIB	2012-12-18	M	South	Genital	0	24	<30	4000
NgBox29/62	4143	29	6940	PIB	2012-12-19	F	South	Genital	0	67	≥30	4122
NgBox29/63	4	4	225	PIB	2012-12-20	M	South	Genital	0	24	<30	4215
NgBox29/64	3704	29	6293	PIB	2012-12-18	M	South	Anorectal	0	27	<30	4000
NgBox29/65	4446	29	7415	PIB	2012-12-20	M	South	Genital	0	16	<30	4000
NgBox29/66	904	349	1415	PIB	2012-12-19	M	North	Genital	0	42	≥30	4811
NgBox29/67	14	33	21	PIB	2012-12-21	M	South	Anorectal	0	36	≥30	4011
NgBox29/68	4446	29	7415	PIB	2012-12-19	M	South	Oropharangeal	0	31	≥30	4006
NgBox29/69	96	1548	8697	PIA	2012-12-20	M	South	Genital	0	54	≥30	4311
NgBox29/70	14	33	21	PIB	2012-12-24	M	South	Oropharangeal	0	28	<30	4300
NgBox29/71	543	29	1288	PIB	2012-12-24	M	South	Genital	0	23	<30	4561
NgBox29/72	147	334	8409	PIA	2012-12-21	M	South	Genital	0	21	<30	4000
NgBox29/73	2002	33	8410	PIA	2012-12-24	M	South	Genital	0	25	<30	4568
NgBox29/74	14	33	21	PIB	2012-12-20	F	South	Genital	0	19	<30	4209
NgBox29/75	4104	1329	6937	PIA	2012-12-24	F		Genital	0	15	<30	4740
NgBox29/76	1222	1334	8411	PIA	2012-12-24	F	South	Genital	0	23	<30	4051
NgBox29/77	4104	1329	6937	PIA	2012-12-21	F	South	Genital	0	17	<30	4171
NgBox29/78	4101	1334	6939	PIA	2012-12-28	M	North	Genital	0	25	<30	4870
NgBox29/79	263	26	384	PIB	2012-12-28	F	South	Genital	0	24	<30	4006
NgBox29/80	5022	1344	8412	PIB	2012-12-24	M	North	Genital	0	22	<30	4875
NgBox29/81	14	33	21	PIB	2012-12-31	M	South	Genital	0	21	<30	4034
NgBox30/01	14	33	21	PIB	2011-01-06	M	South	Oropharangeal	0	26	<30	4064
NgBox30/02	2932	263	4845	PIB	2011-01-11	M	South	Oropharangeal	0	35	≥30	4215
NgBox30/03	2280	1329	6863	PIB	2011-01-14	M	North	Genital	0	27	<30	4810
NgBox30/04	5023	1549	8413	PIB	2011-01-05	M	South	Genital	0	45	≥30	4077
NgBox30/05	970	1550	8414	PIA	2011-01-10	M	South	Genital	0	51	≥30	4500
NgBox30/07	182	29	2018	PIB	2011-01-11	M	South	Genital	0	22	<30	4214
NgBox30/08	1808	29	2992	PIB	2011-01-10	M	South	Genital	0	24	<30	4006
NgBox30/09	908	110	1407	PIB	2011-01-11	M	South	Genital	0	28	<30	4000
NgBox30/10	4101	1330	6876	PIA	2011-01-07	M	North	Genital	0	39	≥30	4816
[truncated: 1,954 more rows]
